# Supplementary material for: Gene expression vs. sequence divergence: comparative transcriptome sequencing among natural Rhinolophus ferrumequinum populations with different acoustic phenotypes
Source: Front Zool. 2019 Sep 13;16:37. doi: 10.1186/s12983-019-0336-7 (PMC6743130; doi:10.1186/s12983-019-0336-7)
Supplement: Supplementary file 1 — Additional file 1: Table S1. Summary of investigated climate and environmental variables. Table S2. Summary of Trinity de novo transcriptome assembly statistics of Rhinolophus ferrumequinum. Table S3. Annotation result statistics between unigenes and databases. Table S4. Nr functional annotation of four unigene datasets hits to Rhinolophus sinicus and other species. Table S5. Complete results of the Gene Ontology (GO) enrichment analysis for gene sets in modules defined by Weighted gene co-expression network analysis (WGCNA). Table S6. Complete results of the Kyoto Encyclopedia of Genes and Genomes (KEGG) enrichment analysis for gene sets in modules defined by WGCNA. Table S7. Complete results of the GO enrichment analysis for the merged gene set in modules significant associated with RF. Table S8. Complete results of the GO enrichment analysis for the merged gene set in modules significantly associated with FL. Table S9. Outlier loci (N = 349) identified in two tests for selection. ‘SNP position’ shows the position in the contig that contains the outlier loci. ‘Tests’ shows which tests identified the SNP as an outlier. Table S10. Detail of genes under positive selection. [file 12983_2019_336_MOESM1_ESM.xlsx]

## Sheet: Table S1
Table S1. Summary of investigated climate and environmental variables.
bio1	Annual Mean Temperature (°C*10)
bio2	Mean Diurnal Range (Mean of monthly (max temp ‐ min temp))
bio3	Isothermality ((BIO2/BIO7)*100)
bio4	Temperature Seasonality (100*standard deviation of mean monthly temperatures)
bio5	Max Temperature of Warmest Month (°C*10)
bio6	Min Temperature of Coldest Month (°C*10)
bio7	Temperature Annual Range (BIO5‐BIO6)
bio8	Mean Temperature of Wettest Quarter (°C*10)
bio9	Mean Temperature of Driest Quarter (°C*10)
bio10	Mean Temperature of Warmest Quarter (°C*10)
bio11	Mean Temperature of Coldest Quarter (°C*10)
bio12	Annual Precipitation (mm)
bio13	Precipitation of Wettest Month (mm)
bio14	Precipitation of Driest Month (mm)
bio15	Precipitation Seasonality [Coefficient of Variation (i.e. standard deviation/mean)]
bio16	Precipitation of Wettest Quarter (mm)
bio17	Precipitation of Driest Quarter (mm)
bio18	Precipitation of Warmest Quarter (mm)
bio19	Precipitation of Coldest Quarter (mm)

## Sheet: Table S2
Table S2 Summary of Trinity de novo transcriptome assembly statistics of Rhinolophus ferrumequinum
schemes	Total Number of Transcripts	Total Number of Genes	N50 (All)	Average length	Max Length (bp)	Mean length (bp)	Assembly (bp)	GC percentage
ALL	110250	70704	2532	1047	27462	201	80356901	48.291
JL	103932	32709	2250	950	26968	201	98836710	47.7714
YN	68110	29079	2595	1050	28130	201	71557172	48.4813
HN	53558	27012	2811	1256	27425	201	67281522	48.9395

## Sheet: Table S3
Table S3 Annotation result statistics between unigenes and databases.
schemes	Total Unigenes	Nr	Swissprot	KOG	Kegg	annotation genes	without annotation gene	Percent of genes having annotation (%)
ALL	70704	26176	22063	15916	14557	26393	44311	37.33
JL	103932	30791	25769	18111	16699	31180	72752	30
YN	68110	27312	23639	16923	15335	27530	40580	40.42
HN	53558	25643	22559	16202	14667	25883	27675	48.33

## Sheet: Table S4
Table S4. Nr functional annotation of four unigene datasets hits to Rhinolophus sinicus and other species.
schemes	species	annotation genes	Total Unigenes
ALL	Rhinolophus sinicus	13470	26176
	Hipposideros armiger	1635
	Homo sapiens	1111
	Pteropus alecto	526
	Rousettus aegyptiacus	396
	Other	9038
JL	Rhinolophus sinicus	14388	30791
	Hipposideros armiger	1808
	Homo sapiens	1345
	Pteropus alecto	681
	Sus scrofa	569
	Other	12000
YN	Rhinolophus sinicus	14318	27312
	Hipposideros armiger	1746
	Homo sapiens	1099
	Pteropus alecto	568
	Sus scrofa	384
	Other	9197
HN	Rhinolophus sinicus	14059	25643
	Hipposideros armiger	1633
	Homo sapiens	926
	Pteropus alecto	479
	Mus musculus	321
	Other	8225

## Sheet: Table S5
Table S5 Complete results of the Gene Ontology (GO) enrichment analysis for gene sets in modules defined by WGCNA.
ModuleID	Ontology	GO ID	Description	Number of Genes	pvalue	fdr	geneID
M6	Biological process	GO:0043903	regulation of symbiosis, encompassing mutualism through parasitism	12	7.90395e-07	0.00142429	Unigene0028490;Unigene0046144;Unigene0043075;Unigene0008061;Unigene0005273;Unigene0049102;Unigene0035171;Unigene0040334;Unigene0036817;Unigene0008141;Unigene0049354;Unigene0000252
M6	Biological process	GO:1903900	regulation of viral life cycle	10	4.68825e-06	0.00396412	Unigene0028490;Unigene0046144;Unigene0043075;Unigene0008061;Unigene0005273;Unigene0049102;Unigene0035171;Unigene0040334;Unigene0036817;Unigene0008141
M6	Biological process	GO:0050792	regulation of viral process	10	6.65622e-06	0.00396412	Unigene0028490;Unigene0046144;Unigene0043075;Unigene0008061;Unigene0005273;Unigene0049102;Unigene0035171;Unigene0040334;Unigene0036817;Unigene0008141
M6	Biological process	GO:0043900	regulation of multi-organism process	13	8.79938e-06	0.00396412	Unigene0002917;Unigene0028490;Unigene0046144;Unigene0043075;Unigene0008061;Unigene0005273;Unigene0049102;Unigene0035171;Unigene0040334;Unigene0036817;Unigene0008141;Unigene0000252;Unigene0049354
M6	Biological process	GO:0043122	regulation of I-kappaB kinase/NF-kappaB signaling	14	1.46532e-05	0.00528101	Unigene0031474;Unigene0048556;Unigene0047938;Unigene0001338;Unigene0007726;Unigene0047124;Unigene0049354;Unigene0001673;Unigene0033091;Unigene0035969;Unigene0000252;Unigene0064199;Unigene0030662;Unigene0028490
M6	Biological process	GO:0051090	regulation of sequence-specific DNA binding transcription factor activity	13	1.98392e-05	0.00595838	Unigene0000137;Unigene0046144;Unigene0043911;Unigene0000252;Unigene0036553;Unigene0028490;Unigene0001673;Unigene0033091;Unigene0036557;Unigene0005247;Unigene0047938;Unigene0049354;Unigene0040320
M6	Biological process	GO:0051704	multi-organism process	43	2.72431e-05	0.00701316	Unigene0008141;Unigene0005247;Unigene0035802;Unigene0038606;Unigene0027351;Unigene0054861;Unigene0030534;Unigene0033091;Unigene0037666;Unigene0046494;Unigene0050337;Unigene0001673;Unigene0035171;Unigene0002398;Unigene0042637;Unigene0008061;Unigene0049102;Unigene0042638;Unigene0048988;Unigene0048026;Unigene0029756;Unigene0045647;Unigene0029631;Unigene0000252;Unigene0043170;Unigene0043911;Unigene00…
M5	Cellular component	GO:0005576	extracellular region	12	1.52891e-07	1.269e-05	Unigene0032056;Unigene0037122;Unigene0014076;Unigene0001962;Unigene0032301;Unigene0020061;Unigene0040319;Unigene0014411;Unigene0058022;Unigene0020803;Unigene0032759;Unigene0028403
M5	Cellular component	GO:0044421	extracellular region part	11	1.21196e-06	5.02964e-05	Unigene0032056;Unigene0037122;Unigene0020061;Unigene0058022;Unigene0028403;Unigene0014076;Unigene0014411;Unigene0032301;Unigene0032759;Unigene0020803;Unigene0040319
M5	Cellular component	GO:0005583	fibrillar collagen trimer	2	0.000259389	0.00430585	Unigene0032056;Unigene0037122
M5	Cellular component	GO:0098643	banded collagen fibril	2	0.000259389	0.00430585	Unigene0032056;Unigene0037122
M5	Cellular component	GO:0098644	complex of collagen trimers	2	0.000259389	0.00430585	Unigene0032056;Unigene0037122
M1	Cellular component	GO:0097458	neuron part	142	1.25034e-45	3.82605e-43	Unigene0035193;Unigene0006625;Unigene0030040;Unigene0051334;Unigene0002087;Unigene0045857;Unigene0006096;Unigene0000239;Unigene0044148;Unigene0049225;Unigene0049477;Unigene0043132;Unigene0005586;Unigene0034509;Unigene0032955;Unigene0035775;Unigene0004519;Unigene0024532;Unigene0007288;Unigene0030297;Unigene0001071;Unigene0020272;Unigene0005940;Unigene0029807;Unigene0006270;Unigene0002819;Unigene00…
M1	Cellular component	GO:0043005	neuron projection	134	1.14043e-43	1.74486e-41	Unigene0035193;Unigene0006625;Unigene0030040;Unigene0051334;Unigene0002087;Unigene0045857;Unigene0006096;Unigene0000239;Unigene0044148;Unigene0049225;Unigene0049477;Unigene0043132;Unigene0005586;Unigene0034509;Unigene0032955;Unigene0035775;Unigene0004519;Unigene0024532;Unigene0007288;Unigene0030297;Unigene0001071;Unigene0020272;Unigene0005940;Unigene0029807;Unigene0006270;Unigene0002819;Unigene00…
M1	Cellular component	GO:0045202	synapse	90	1.14977e-37	1.17276e-35	Unigene0037266;Unigene0035021;Unigene0030267;Unigene0042156;Unigene0040837;Unigene0050822;Unigene0030265;Unigene0039819;Unigene0038134;Unigene0037263;Unigene0044642;Unigene0030297;Unigene0041202;Unigene0038701;Unigene0036092;Unigene0040652;Unigene0041492;Unigene0037340;Unigene0005066;Unigene0045718;Unigene0024040;Unigene0050465;Unigene0027316;Unigene0050464;Unigene0029807;Unigene0005940;Unigene00…
M1	Cellular component	GO:0044456	synapse part	81	9.39013e-36	7.18345e-34	Unigene0036092;Unigene0040652;Unigene0039819;Unigene0041492;Unigene0037340;Unigene0005066;Unigene0045718;Unigene0040837;Unigene0024040;Unigene0050465;Unigene0037263;Unigene0027316;Unigene0050464;Unigene0029807;Unigene0005940;Unigene0038795;Unigene0003934;Unigene0040479;Unigene0038134;Unigene0047384;Unigene0048331;Unigene0051887;Unigene0028145;Unigene0040559;Unigene0046038;Unigene0005291;Unigene00…
M1	Cellular component	GO:0044425	membrane part	426	1.81402e-35	1.11018e-33	Unigene0042967;Unigene0039797;Unigene0035193;Unigene0006606;Unigene0041492;Unigene0045857;Unigene0023917;Unigene0003755;Unigene0049852;Unigene0033555;Unigene0029807;Unigene0051835;Unigene0040076;Unigene0042498;Unigene0013425;Unigene0049580;Unigene0021846;Unigene0036092;Unigene0037266;Unigene0037677;Unigene0033075;Unigene0004655;Unigene0006576;Unigene0052119;Unigene0033726;Unigene0021845;Unigene00…
M1	Cellular component	GO:0016020	membrane	534	9.94803e-34	5.0735e-32	Unigene0042644;Unigene0042967;Unigene0039797;Unigene0035193;Unigene0006606;Unigene0041492;Unigene0045857;Unigene0023917;Unigene0003755;Unigene0049852;Unigene0046825;Unigene0007288;Unigene0044633;Unigene0046306;Unigene0032955;Unigene0040499;Unigene0033555;Unigene0029807;Unigene0051835;Unigene0040076;Unigene0013425;Unigene0033364;Unigene0047013;Unigene0005277;Unigene0046609;Unigene0051337;Unigene00…
M1	Cellular component	GO:0031224	intrinsic component of membrane	361	1.93529e-30	8.45999e-29	Unigene0041492;Unigene0045857;Unigene0023917;Unigene0003755;Unigene0049852;Unigene0013425;Unigene0049580;Unigene0021846;Unigene0036092;Unigene0037266;Unigene0037677;Unigene0033075;Unigene0004655;Unigene0006576;Unigene0052119;Unigene0033726;Unigene0021845;Unigene0040837;Unigene0037263;Unigene0036335;Unigene0006625;Unigene0031580;Unigene0042156;Unigene0041430;Unigene0005885;Unigene0051653;Unigene00…
M1	Cellular component	GO:0042995	cell projection	176	1.6643e-29	6.36593e-28	Unigene0035193;Unigene0006625;Unigene0030040;Unigene0051334;Unigene0002087;Unigene0045857;Unigene0006096;Unigene0000239;Unigene0044148;Unigene0049225;Unigene0040889;Unigene0047370;Unigene0049477;Unigene0043132;Unigene0005586;Unigene0034509;Unigene0032955;Unigene0035775;Unigene0004519;Unigene0024532;Unigene0007288;Unigene0030297;Unigene0001071;Unigene0020272;Unigene0005940;Unigene0029807;Unigene00…
M1	Cellular component	GO:0097060	synaptic membrane	54	3.87146e-23	1.3163e-21	Unigene0008241;Unigene0046672;Unigene0048331;Unigene0003934;Unigene0033648;Unigene0037311;Unigene0033909;Unigene0048332;Unigene0037266;Unigene0028145;Unigene0006058;Unigene0030267;Unigene0030265;Unigene0041492;Unigene0004519;Unigene0004512;Unigene0030145;Unigene0037263;Unigene0047384;Unigene0005277;Unigene0036092;Unigene0006625;Unigene0040559;Unigene0041052;Unigene0005291;Unigene0038134;Unigene00…
M1	Cellular component	GO:0098590	plasma membrane region	70	2.39663e-22	7.33369e-21	Unigene0049510;Unigene0052239;Unigene0051041;Unigene0042391;Unigene0005885;Unigene0045857;Unigene0036828;Unigene0007288;Unigene0051030;Unigene0047370;Unigene0048631;Unigene0002087;Unigene0022960;Unigene0008865;Unigene0006025;Unigene0027316;Unigene0005066;Unigene0054586;Unigene0045718;Unigene0048332;Unigene0033648;Unigene0006058;Unigene0037263;Unigene0009034;Unigene0037166;Unigene0042156;Unigene00…
M1	Cellular component	GO:0098589	membrane region	81	2.74849e-20	7.64581e-19	Unigene0049510;Unigene0052239;Unigene0051041;Unigene0042391;Unigene0005885;Unigene0045857;Unigene0036828;Unigene0007288;Unigene0051030;Unigene0047370;Unigene0048631;Unigene0002087;Unigene0022960;Unigene0008865;Unigene0006025;Unigene0027316;Unigene0005066;Unigene0054586;Unigene0045718;Unigene0048332;Unigene0033648;Unigene0006058;Unigene0037263;Unigene0009034;Unigene0037166;Unigene0042156;Unigene00…
M1	Cellular component	GO:0044297	cell body	57	4.44803e-20	1.13425e-18	Unigene0043489;Unigene0040531;Unigene0049392;Unigene0006270;Unigene0039266;Unigene0052340;Unigene0024532;Unigene0070676;Unigene0004816;Unigene0037485;Unigene0035775;Unigene0032630;Unigene0052425;Unigene0039489;Unigene0005940;Unigene0045995;Unigene0047372;Unigene0036303;Unigene0045857;Unigene0022483;Unigene0028524;Unigene0047373;Unigene0000627;Unigene0043375;Unigene0048568;Unigene0035971;Unigene00…
M1	Cellular component	GO:0044459	plasma membrane part	112	7.12134e-18	1.67625e-16	Unigene0041492;Unigene0045857;Unigene0033555;Unigene0029807;Unigene0051835;Unigene0040076;Unigene0021846;Unigene0036092;Unigene0013425;Unigene0037266;Unigene0037677;Unigene0033075;Unigene0004655;Unigene0006576;Unigene0052119;Unigene0033726;Unigene0021845;Unigene0040837;Unigene0037263;Unigene0036335;Unigene0006625;Unigene0031580;Unigene0042156;Unigene0041430;Unigene0005885;Unigene0051653;Unigene00…
M1	Cellular component	GO:0034702	ion channel complex	48	4.59298e-17	1.0039e-15	Unigene0021846;Unigene0036092;Unigene0013425;Unigene0037266;Unigene0037677;Unigene0033075;Unigene0004655;Unigene0006576;Unigene0052119;Unigene0033726;Unigene0021845;Unigene0040837;Unigene0037263;Unigene0036335;Unigene0006625;Unigene0031580;Unigene0042156;Unigene0041430;Unigene0005885;Unigene0051653;Unigene0029807;Unigene0034743;Unigene0049397;Unigene0027995;Unigene0045034;Unigene0019228;Unigene00…
M1	Cellular component	GO:1902495	transmembrane transporter complex	48	1.01152e-16	1.93453e-15	Unigene0021846;Unigene0036092;Unigene0013425;Unigene0037266;Unigene0037677;Unigene0033075;Unigene0004655;Unigene0006576;Unigene0052119;Unigene0033726;Unigene0021845;Unigene0040837;Unigene0037263;Unigene0036335;Unigene0006625;Unigene0031580;Unigene0042156;Unigene0041430;Unigene0005885;Unigene0051653;Unigene0029807;Unigene0034743;Unigene0049397;Unigene0027995;Unigene0045034;Unigene0019228;Unigene00…
M1	Cellular component	GO:1990351	transporter complex	48	1.01152e-16	1.93453e-15	Unigene0005885;Unigene0019228;Unigene0051653;Unigene0029807;Unigene0039266;Unigene0007779;Unigene0046609;Unigene0047013;Unigene0006625;Unigene0039296;Unigene0039394;Unigene0041430;Unigene0052657;Unigene0052119;Unigene0049397;Unigene0051393;Unigene0033075;Unigene0047384;Unigene0052237;Unigene0047742;Unigene0034743;Unigene0037263;Unigene0045034;Unigene0036335;Unigene0040837;Unigene0033726;Unigene00…
M1	Cellular component	GO:0008328	ionotropic glutamate receptor complex	21	9.94583e-15	1.79025e-13	Unigene0021846;Unigene0036092;Unigene0013425;Unigene0037266;Unigene0037677;Unigene0033075;Unigene0004655;Unigene0006576;Unigene0052119;Unigene0033726;Unigene0021845;Unigene0040837;Unigene0037263;Unigene0036335;Unigene0006625;Unigene0031580;Unigene0042156;Unigene0041430;Unigene0005885;Unigene0051653;Unigene0029807
M1	Cellular component	GO:0031226	intrinsic component of plasma membrane	32	3.12046e-14	5.30478e-13	Unigene0041492;Unigene0045857;Unigene0021846;Unigene0036092;Unigene0013425;Unigene0037266;Unigene0037677;Unigene0033075;Unigene0004655;Unigene0006576;Unigene0052119;Unigene0033726;Unigene0021845;Unigene0040837;Unigene0037263;Unigene0036335;Unigene0006625;Unigene0031580;Unigene0042156;Unigene0041430;Unigene0005885;Unigene0051653;Unigene0029807;Unigene0032508;Unigene0036858;Unigene0050884;Unigene00…
M1	Cellular component	GO:0005887	integral component of plasma membrane	30	6.38681e-14	1.02861e-12	Unigene0041492;Unigene0045857;Unigene0021846;Unigene0036092;Unigene0013425;Unigene0037266;Unigene0037677;Unigene0033075;Unigene0004655;Unigene0006576;Unigene0052119;Unigene0033726;Unigene0021845;Unigene0040837;Unigene0037263;Unigene0036335;Unigene0006625;Unigene0031580;Unigene0042156;Unigene0041430;Unigene0005885;Unigene0051653;Unigene0029807;Unigene0050884;Unigene0021641;Unigene0000526;Unigene00…
M1	Cellular component	GO:0005886	plasma membrane	123	7.22854e-14	1.10597e-12	Unigene0041492;Unigene0045857;Unigene0033555;Unigene0029807;Unigene0051835;Unigene0040076;Unigene0013425;Unigene0033364;Unigene0047013;Unigene0007288;Unigene0005277;Unigene0046609;Unigene0051337;Unigene0006058;Unigene0036828;Unigene0027316;Unigene0021641;Unigene0048631;Unigene0048147;Unigene0037677;Unigene0004512;Unigene0040559;Unigene0007779;Unigene0006625;Unigene0045081;Unigene0021845;Unigene00…
M1	Cellular component	GO:0071944	cell periphery	124	2.1989e-13	3.20411e-12	Unigene0041492;Unigene0045857;Unigene0033555;Unigene0029807;Unigene0051835;Unigene0040076;Unigene0013425;Unigene0033364;Unigene0047013;Unigene0007288;Unigene0005277;Unigene0046609;Unigene0051337;Unigene0006058;Unigene0036828;Unigene0027316;Unigene0021641;Unigene0048631;Unigene0048147;Unigene0037677;Unigene0004512;Unigene0040559;Unigene0007779;Unigene0006625;Unigene0045081;Unigene0021845;Unigene00…
M1	Cellular component	GO:0030424	axon	32	3.13222e-13	4.35663e-12	Unigene0031167;Unigene0031166;Unigene0045581;Unigene0040560;Unigene0024532;Unigene0038613;Unigene0029807;Unigene0043489;Unigene0039296;Unigene0052699;Unigene0040829;Unigene0013348;Unigene0042836;Unigene0004750;Unigene0000701;Unigene0021641;Unigene0052237;Unigene0049549;Unigene0052239;Unigene0043128;Unigene0006270;Unigene0030363;Unigene0002819;Unigene0043132;Unigene0022531;Unigene0052340;Unigene00…
M1	Cellular component	GO:0098802	plasma membrane receptor complex	25	4.95338e-13	6.59015e-12	Unigene0041492;Unigene0045857;Unigene0021846;Unigene0036092;Unigene0013425;Unigene0037266;Unigene0037677;Unigene0033075;Unigene0004655;Unigene0006576;Unigene0052119;Unigene0033726;Unigene0021845;Unigene0040837;Unigene0037263;Unigene0036335;Unigene0006625;Unigene0031580;Unigene0042156;Unigene0041430;Unigene0005885;Unigene0051653;Unigene0029807;Unigene0048147;Unigene0000526
M1	Cellular component	GO:0033267	axon part	29	9.08592e-13	1.15845e-11	Unigene0031167;Unigene0031166;Unigene0045581;Unigene0040560;Unigene0024532;Unigene0038613;Unigene0029807;Unigene0043489;Unigene0039296;Unigene0052699;Unigene0040829;Unigene0013348;Unigene0042836;Unigene0004750;Unigene0000701;Unigene0021641;Unigene0052237;Unigene0049549;Unigene0052239;Unigene0043128;Unigene0006270;Unigene0030363;Unigene0002819;Unigene0043132;Unigene0022531;Unigene0052340;Unigene00…
M1	Cellular component	GO:0098794	postsynapse	16	6.31586e-11	7.73061e-10	Unigene0035021;Unigene0044642;Unigene0040837;Unigene0038134;Unigene0030297;Unigene0030267;Unigene0050822;Unigene0039819;Unigene0041202;Unigene0030265;Unigene0037266;Unigene0038701;Unigene0042156;Unigene0037263;Unigene0002087;Unigene0051334
M1	Cellular component	GO:0043235	receptor complex	29	1.75701e-10	2.06142e-09	Unigene0041492;Unigene0045857;Unigene0021846;Unigene0036092;Unigene0013425;Unigene0037266;Unigene0037677;Unigene0033075;Unigene0004655;Unigene0006576;Unigene0052119;Unigene0033726;Unigene0021845;Unigene0040837;Unigene0037263;Unigene0036335;Unigene0006625;Unigene0031580;Unigene0042156;Unigene0041430;Unigene0005885;Unigene0051653;Unigene0029807;Unigene0024040;Unigene0046609;Unigene0005066;Unigene00…
M1	Cellular component	GO:0098796	membrane protein complex	67	1.87483e-10	2.06142e-09	Unigene0042967;Unigene0039797;Unigene0035193;Unigene0006606;Unigene0041492;Unigene0045857;Unigene0042498;Unigene0021846;Unigene0036092;Unigene0013425;Unigene0037266;Unigene0037677;Unigene0033075;Unigene0004655;Unigene0006576;Unigene0052119;Unigene0033726;Unigene0021845;Unigene0040837;Unigene0037263;Unigene0036335;Unigene0006625;Unigene0031580;Unigene0042156;Unigene0041430;Unigene0005885;Unigene00…
M1	Cellular component	GO:0098805	whole membrane	93	1.88627e-10	2.06142e-09	Unigene0046825;Unigene0007288;Unigene0044633;Unigene0046306;Unigene0032955;Unigene0040499;Unigene0042498;Unigene0052778;Unigene0042644;Unigene0049510;Unigene0052239;Unigene0051041;Unigene0042391;Unigene0005885;Unigene0045857;Unigene0036828;Unigene0051030;Unigene0047370;Unigene0048631;Unigene0002087;Unigene0022960;Unigene0008865;Unigene0006025;Unigene0027316;Unigene0005066;Unigene0054586;Unigene00…
M1	Cellular component	GO:0016021	integral component of membrane	96	2.71092e-10	2.86048e-09	Unigene0041492;Unigene0045857;Unigene0023917;Unigene0003755;Unigene0049852;Unigene0021846;Unigene0036092;Unigene0013425;Unigene0037266;Unigene0037677;Unigene0033075;Unigene0004655;Unigene0006576;Unigene0052119;Unigene0033726;Unigene0021845;Unigene0040837;Unigene0037263;Unigene0036335;Unigene0006625;Unigene0031580;Unigene0042156;Unigene0041430;Unigene0005885;Unigene0051653;Unigene0029807;Unigene00…
M1	Cellular component	GO:0014069	postsynaptic density	14	9.38306e-10	8.97255e-09	Unigene0035021;Unigene0044642;Unigene0040837;Unigene0038134;Unigene0030297;Unigene0030267;Unigene0050822;Unigene0039819;Unigene0041202;Unigene0030265;Unigene0037266;Unigene0038701;Unigene0042156;Unigene0037263
M1	Cellular component	GO:0060076	excitatory synapse	14	9.38306e-10	8.97255e-09	Unigene0037266;Unigene0035021;Unigene0030267;Unigene0042156;Unigene0040837;Unigene0050822;Unigene0030265;Unigene0039819;Unigene0038134;Unigene0037263;Unigene0044642;Unigene0030297;Unigene0041202;Unigene0038701
M1	Cellular component	GO:0099572	postsynaptic specialization	14	9.38306e-10	8.97255e-09	Unigene0035021;Unigene0044642;Unigene0040837;Unigene0038134;Unigene0030297;Unigene0030267;Unigene0050822;Unigene0039819;Unigene0041202;Unigene0030265;Unigene0037266;Unigene0038701;Unigene0042156;Unigene0037263
M1	Cellular component	GO:0044309	neuron spine	22	2.3701e-09	2.19773e-08	Unigene0030265;Unigene0017987;Unigene0029807;Unigene0004512;Unigene0046672;Unigene0051337;Unigene0042156;Unigene0005586;Unigene0039881;Unigene0030040;Unigene0023577;Unigene0040837;Unigene0002087;Unigene0035775;Unigene0051334;Unigene0036738;Unigene0030297;Unigene0045857;Unigene0033648;Unigene0006625;Unigene0004519;Unigene0030145
M1	Cellular component	GO:0098797	plasma membrane protein complex	25	2.87895e-08	2.59106e-07	Unigene0041492;Unigene0045857;Unigene0021846;Unigene0036092;Unigene0013425;Unigene0037266;Unigene0037677;Unigene0033075;Unigene0004655;Unigene0006576;Unigene0052119;Unigene0033726;Unigene0021845;Unigene0040837;Unigene0037263;Unigene0036335;Unigene0006625;Unigene0031580;Unigene0042156;Unigene0041430;Unigene0005885;Unigene0051653;Unigene0029807;Unigene0048147;Unigene0000526
M1	Cellular component	GO:0044463	cell projection part	54	3.60489e-08	3.15171e-07	Unigene0042391;Unigene0002819;Unigene0051030;Unigene0027316;Unigene0049510;Unigene0039819;Unigene0004750;Unigene0052340;Unigene0047370;Unigene0030363;Unigene0043132;Unigene0005586;Unigene0020013;Unigene0042836;Unigene0029807;Unigene0044051;Unigene0005066;Unigene0051334;Unigene0008865;Unigene0044882;Unigene0052237;Unigene0050465;Unigene0043128;Unigene0036828;Unigene0043489;Unigene0006025;Unigene00…
M1	Cellular component	GO:0034703	cation channel complex	19	2.90617e-06	2.47025e-05	Unigene0033075;Unigene0034743;Unigene0049397;Unigene0033726;Unigene0052119;Unigene0047742;Unigene0052237;Unigene0039394;Unigene0048155;Unigene0037485;Unigene0039296;Unigene0052239;Unigene0027995;Unigene0047013;Unigene0051393;Unigene0052657;Unigene0040076;Unigene0021641;Unigene0038613
M1	Cellular component	GO:0016023	cytoplasmic, membrane-bounded vesicle	59	7.22237e-06	5.97309e-05	Unigene0042498;Unigene0048631;Unigene0001804;Unigene0051480;Unigene0032508;Unigene0004831;Unigene0042034;Unigene0041462;Unigene0039797;Unigene0052778;Unigene0046869;Unigene0001997;Unigene0040923;Unigene0022780;Unigene0041430;Unigene0008670;Unigene0003698;Unigene0051477;Unigene0005460;Unigene0031606;Unigene0005281;Unigene0048568;Unigene0032206;Unigene0029807;Unigene0031166;Unigene0039819;Unigene00…
M1	Cellular component	GO:0031410	cytoplasmic vesicle	60	8.7402e-06	7.03816e-05	Unigene0042498;Unigene0048631;Unigene0001804;Unigene0051480;Unigene0032508;Unigene0004831;Unigene0042034;Unigene0041462;Unigene0039797;Unigene0052778;Unigene0046869;Unigene0001997;Unigene0040923;Unigene0022780;Unigene0041430;Unigene0008670;Unigene0003698;Unigene0051477;Unigene0005460;Unigene0031606;Unigene0005281;Unigene0048568;Unigene0032206;Unigene0029807;Unigene0031166;Unigene0039819;Unigene00…
M1	Cellular component	GO:0036477	somatodendritic compartment	13	2.15404e-05	0.000169009	Unigene0035193;Unigene0006625;Unigene0030040;Unigene0051334;Unigene0002087;Unigene0045857;Unigene0006096;Unigene0000239;Unigene0044148;Unigene0049225;Unigene0049392;Unigene0042171;Unigene0044147
M1	Cellular component	GO:0034705	potassium channel complex	10	8.23521e-05	0.000629994	Unigene0047742;Unigene0052237;Unigene0039394;Unigene0048155;Unigene0037485;Unigene0039296;Unigene0052239;Unigene0027995;Unigene0047013;Unigene0051393
M1	Cellular component	GO:0031256	leading edge membrane	8	0.00014539	0.00105927	Unigene0049510;Unigene0052239;Unigene0005885;Unigene0045857;Unigene0002087;Unigene0005066;Unigene0051030;Unigene0007288
M1	Cellular component	GO:0032589	neuron projection membrane	8	0.00014539	0.00105927	Unigene0049510;Unigene0052239;Unigene0005885;Unigene0045857;Unigene0002087;Unigene0005066;Unigene0051030;Unigene0007288
M1	Cellular component	GO:0031201	SNARE complex	3	0.000391207	0.00278394	Unigene0047373;Unigene0047372;Unigene0000701
M1	Cellular component	GO:0030425	dendrite	10	0.000471679	0.00328031	Unigene0035193;Unigene0006625;Unigene0030040;Unigene0051334;Unigene0002087;Unigene0045857;Unigene0006096;Unigene0000239;Unigene0044148;Unigene0049225
M1	Cellular component	GO:0031253	cell projection membrane	18	0.00123909	0.00842583	Unigene0049510;Unigene0052239;Unigene0051041;Unigene0042391;Unigene0005885;Unigene0045857;Unigene0036828;Unigene0007288;Unigene0051030;Unigene0047370;Unigene0048631;Unigene0002087;Unigene0022960;Unigene0008865;Unigene0006025;Unigene0027316;Unigene0005066;Unigene0054586
M1	Cellular component	GO:1902710	GABA receptor complex	3	0.00147917	0.00983971	Unigene0040652;Unigene0005066;Unigene0046609
M1	Molecular Function	GO:0015075	ion transmembrane transporter activity	92	1.53283e-14	8.03201e-12	Unigene0028322;Unigene0005616;Unigene0022976;Unigene0051393;Unigene0048008;Unigene0027995;Unigene0024040;Unigene0019228;Unigene0047013;Unigene0005066;Unigene0005277;Unigene0017987;Unigene0048323;Unigene0046609;Unigene0006716;Unigene0002158;Unigene0034535;Unigene0037266;Unigene0006096;Unigene0035405;Unigene0033726;Unigene0050884;Unigene0002956;Unigene0039777;Unigene0007779;Unigene0037485;Unigene00…
M1	Molecular Function	GO:0015267	channel activity	57	5.23648e-14	1.2689e-11	Unigene0022976;Unigene0051393;Unigene0048008;Unigene0027995;Unigene0024040;Unigene0019228;Unigene0047013;Unigene0005066;Unigene0005277;Unigene0017987;Unigene0048323;Unigene0046609;Unigene0006716;Unigene0002158;Unigene0034535;Unigene0037266;Unigene0006096;Unigene0035405;Unigene0033726;Unigene0050884;Unigene0002956;Unigene0039777;Unigene0007779;Unigene0037485;Unigene0052699;Unigene0046038;Unigene00…
M1	Molecular Function	GO:0022803	passive transmembrane transporter activity	57	7.26469e-14	1.2689e-11	Unigene0022976;Unigene0051393;Unigene0048008;Unigene0027995;Unigene0024040;Unigene0019228;Unigene0047013;Unigene0005066;Unigene0005277;Unigene0017987;Unigene0048323;Unigene0046609;Unigene0006716;Unigene0002158;Unigene0034535;Unigene0037266;Unigene0006096;Unigene0035405;Unigene0033726;Unigene0050884;Unigene0002956;Unigene0039777;Unigene0007779;Unigene0037485;Unigene0052699;Unigene0046038;Unigene00…
M1	Molecular Function	GO:0022857	transmembrane transporter activity	100	1.75874e-13	1.94512e-11	Unigene0028322;Unigene0005616;Unigene0022976;Unigene0051393;Unigene0048008;Unigene0027995;Unigene0024040;Unigene0019228;Unigene0047013;Unigene0005066;Unigene0005277;Unigene0017987;Unigene0048323;Unigene0046609;Unigene0006716;Unigene0002158;Unigene0034535;Unigene0037266;Unigene0006096;Unigene0035405;Unigene0033726;Unigene0050884;Unigene0002956;Unigene0039777;Unigene0007779;Unigene0037485;Unigene00…
M1	Molecular Function	GO:0022891	substrate-specific transmembrane transporter activity	94	1.85603e-13	1.94512e-11	Unigene0028322;Unigene0005616;Unigene0022976;Unigene0051393;Unigene0048008;Unigene0027995;Unigene0024040;Unigene0019228;Unigene0047013;Unigene0005066;Unigene0005277;Unigene0017987;Unigene0048323;Unigene0046609;Unigene0006716;Unigene0002158;Unigene0034535;Unigene0037266;Unigene0006096;Unigene0035405;Unigene0033726;Unigene0050884;Unigene0002956;Unigene0039777;Unigene0007779;Unigene0037485;Unigene00…
M1	Molecular Function	GO:0005216	ion channel activity	55	3.68874e-13	2.76129e-11	Unigene0022976;Unigene0051393;Unigene0048008;Unigene0027995;Unigene0024040;Unigene0019228;Unigene0047013;Unigene0005066;Unigene0005277;Unigene0017987;Unigene0048323;Unigene0046609;Unigene0006716;Unigene0002158;Unigene0034535;Unigene0037266;Unigene0006096;Unigene0035405;Unigene0033726;Unigene0050884;Unigene0002956;Unigene0039777;Unigene0007779;Unigene0037485;Unigene0052699;Unigene0046038;Unigene00…
M1	Molecular Function	GO:0022838	substrate-specific channel activity	55	3.68874e-13	2.76129e-11	Unigene0022976;Unigene0051393;Unigene0048008;Unigene0027995;Unigene0024040;Unigene0019228;Unigene0047013;Unigene0005066;Unigene0005277;Unigene0017987;Unigene0048323;Unigene0046609;Unigene0006716;Unigene0002158;Unigene0034535;Unigene0037266;Unigene0006096;Unigene0035405;Unigene0033726;Unigene0050884;Unigene0002956;Unigene0039777;Unigene0007779;Unigene0037485;Unigene0052699;Unigene0046038;Unigene00…
M1	Molecular Function	GO:0005215	transporter activity	112	1.02271e-12	6.69877e-11	Unigene0028322;Unigene0005616;Unigene0022976;Unigene0051393;Unigene0048008;Unigene0027995;Unigene0024040;Unigene0019228;Unigene0047013;Unigene0005066;Unigene0005277;Unigene0017987;Unigene0048323;Unigene0046609;Unigene0006716;Unigene0002158;Unigene0034535;Unigene0037266;Unigene0006096;Unigene0035405;Unigene0033726;Unigene0050884;Unigene0002956;Unigene0039777;Unigene0007779;Unigene0037485;Unigene00…
M1	Molecular Function	GO:0022892	substrate-specific transporter activity	99	2.44711e-11	1.42476e-09	Unigene0028322;Unigene0005616;Unigene0022976;Unigene0051393;Unigene0048008;Unigene0027995;Unigene0024040;Unigene0019228;Unigene0047013;Unigene0005066;Unigene0005277;Unigene0017987;Unigene0048323;Unigene0046609;Unigene0006716;Unigene0002158;Unigene0034535;Unigene0037266;Unigene0006096;Unigene0035405;Unigene0033726;Unigene0050884;Unigene0002956;Unigene0039777;Unigene0007779;Unigene0037485;Unigene00…
M1	Molecular Function	GO:0022836	gated channel activity	29	1.52895e-09	8.01168e-08	Unigene0035405;Unigene0041430;Unigene0005460;Unigene0037266;Unigene0049654;Unigene0040837;Unigene0029536;Unigene0037263;Unigene0005291;Unigene0039266;Unigene0047384;Unigene0019228;Unigene0040652;Unigene0005066;Unigene0037340;Unigene0052657;Unigene0007779;Unigene0002158;Unigene0024040;Unigene0046609;Unigene0033125;Unigene0007364;Unigene0038613;Unigene0022976;Unigene0052237;Unigene0050884;Unigene00…
M1	Molecular Function	GO:0008324	cation transmembrane transporter activity	56	1.85373e-09	8.8305e-08	Unigene0028322;Unigene0005616;Unigene0040237;Unigene0044147;Unigene0030980;Unigene0044148;Unigene0040076;Unigene0051337;Unigene0052237;Unigene0048323;Unigene0051393;Unigene0036404;Unigene0051334;Unigene0035405;Unigene0007364;Unigene0027949;Unigene0027995;Unigene0047742;Unigene0006024;Unigene0039777;Unigene0002803;Unigene0032005;Unigene0022976;Unigene0047013;Unigene0049029;Unigene0050884;Unigene00…
M1	Molecular Function	GO:0046873	metal ion transmembrane transporter activity	35	2.68452e-09	1.17224e-07	Unigene0040076;Unigene0051337;Unigene0052237;Unigene0048323;Unigene0051393;Unigene0036404;Unigene0051334;Unigene0035405;Unigene0007364;Unigene0027949;Unigene0027995;Unigene0047742;Unigene0050183;Unigene0041130;Unigene0049510;Unigene0038613;Unigene0042438;Unigene0050884;Unigene0006716;Unigene0051497;Unigene0035775;Unigene0017987;Unigene0030980;Unigene0021641;Unigene0022976;Unigene0040237;Unigene00…
M1	Molecular Function	GO:0015291	secondary active transmembrane transporter activity	26	9.07951e-09	3.65974e-07	Unigene0040237;Unigene0044147;Unigene0030980;Unigene0044148;Unigene0041173;Unigene0049392;Unigene0037103;Unigene0028762;Unigene0042438;Unigene0006903;Unigene0005616;Unigene0049510;Unigene0031167;Unigene0041130;Unigene0031166;Unigene0050183;Unigene0006024;Unigene0035071;Unigene0051497;Unigene0013997;Unigene0032027;Unigene0032206;Unigene0035775;Unigene0002905;Unigene0045652;Unigene0039417
M1	Molecular Function	GO:0005261	cation channel activity	33	1.60202e-08	5.99614e-07	Unigene0038613;Unigene0052657;Unigene0007364;Unigene0035405;Unigene0052119;Unigene0033726;Unigene0005277;Unigene0032005;Unigene0006096;Unigene0048008;Unigene0006716;Unigene0050884;Unigene0017987;Unigene0022976;Unigene0021641;Unigene0047742;Unigene0027995;Unigene0051393;Unigene0036404;Unigene0052237;Unigene0040076;Unigene0048323;Unigene0005586;Unigene0043962;Unigene0039777;Unigene0037485;Unigene00…
M1	Molecular Function	GO:0022804	active transmembrane transporter activity	34	3.96464e-08	1.38498e-06	Unigene0040237;Unigene0044147;Unigene0030980;Unigene0044148;Unigene0049029;Unigene0023917;Unigene0051337;Unigene0051334;Unigene0027949;Unigene0028322;Unigene0041173;Unigene0049392;Unigene0037103;Unigene0028762;Unigene0042438;Unigene0006903;Unigene0005616;Unigene0051497;Unigene0032027;Unigene0050183;Unigene0032206;Unigene0045652;Unigene0002905;Unigene0013997;Unigene0006024;Unigene0031167;Unigene00…
M1	Molecular Function	GO:0015276	ligand-gated ion channel activity	21	8.21391e-08	2.53182e-06	Unigene0046609;Unigene0037340;Unigene0037263;Unigene0037266;Unigene0041430;Unigene0040837;Unigene0039266;Unigene0007779;Unigene0047384;Unigene0005291;Unigene0005460;Unigene0002158;Unigene0005066;Unigene0024040;Unigene0019228;Unigene0040652;Unigene0049654;Unigene0035405;Unigene0029536;Unigene0033125;Unigene0052657
M1	Molecular Function	GO:0022834	ligand-gated channel activity	21	8.21391e-08	2.53182e-06	Unigene0035405;Unigene0041430;Unigene0005460;Unigene0037266;Unigene0049654;Unigene0040837;Unigene0029536;Unigene0037263;Unigene0005291;Unigene0039266;Unigene0047384;Unigene0019228;Unigene0040652;Unigene0005066;Unigene0037340;Unigene0052657;Unigene0007779;Unigene0002158;Unigene0024040;Unigene0046609;Unigene0033125
M1	Molecular Function	GO:0015077	monovalent inorganic cation transmembrane transporter activity	31	1.94519e-07	5.66268e-06	Unigene0028322;Unigene0005616;Unigene0040076;Unigene0051337;Unigene0052237;Unigene0048323;Unigene0051393;Unigene0036404;Unigene0051334;Unigene0035405;Unigene0007364;Unigene0027949;Unigene0027995;Unigene0047742;Unigene0050183;Unigene0041130;Unigene0049510;Unigene0038613;Unigene0042438;Unigene0050884;Unigene0006716;Unigene0051497;Unigene0035775;Unigene0017987;Unigene0030980;Unigene0021641;Unigene00…
M1	Molecular Function	GO:0022890	inorganic cation transmembrane transporter activity	40	2.37543e-07	6.55119e-06	Unigene0028322;Unigene0005616;Unigene0040076;Unigene0051337;Unigene0052237;Unigene0048323;Unigene0051393;Unigene0036404;Unigene0051334;Unigene0035405;Unigene0007364;Unigene0027949;Unigene0027995;Unigene0047742;Unigene0050183;Unigene0041130;Unigene0049510;Unigene0052657;Unigene0022976;Unigene0006096;Unigene0002803;Unigene0005277;Unigene0030980;Unigene0038613;Unigene0052119;Unigene0050050;Unigene00…
M1	Molecular Function	GO:0015081	sodium ion transmembrane transporter activity	16	3.60025e-07	9.43265e-06	Unigene0050183;Unigene0041130;Unigene0049510;Unigene0038613;Unigene0042438;Unigene0050884;Unigene0006716;Unigene0051497;Unigene0051334;Unigene0035775;Unigene0017987;Unigene0030980;Unigene0021641;Unigene0022976;Unigene0040237;Unigene0006024
M1	Molecular Function	GO:0008509	anion transmembrane transporter activity	32	1.34316e-06	3.35149e-05	Unigene0040237;Unigene0044147;Unigene0030980;Unigene0044148;Unigene0049510;Unigene0031167;Unigene0041130;Unigene0031166;Unigene0050183;Unigene0024040;Unigene0019228;Unigene0046609;Unigene0045034;Unigene0034535;Unigene0005291;Unigene0040652;Unigene0005066;Unigene0005239;Unigene0045652;Unigene0037196;Unigene0042438;Unigene0032206;Unigene0041173;Unigene0011580;Unigene0001302;Unigene0002905;Unigene00…
M1	Molecular Function	GO:0035254	glutamate receptor binding	9	1.8673e-06	4.44756e-05	Unigene0042156;Unigene0030297;Unigene0030267;Unigene0029807;Unigene0030265;Unigene0051653;Unigene0006971;Unigene0052119;Unigene0004512
M1	Molecular Function	GO:0019905	syntaxin binding	7	1.77056e-05	0.00040338	Unigene0047373;Unigene0047372;Unigene0051722;Unigene0006024;Unigene0045581;Unigene0000701;Unigene0003755
M1	Molecular Function	GO:0015301	anion:anion antiporter activity	6	1.89016e-05	0.000412685	Unigene0028762;Unigene0049392;Unigene0037103;Unigene0006903;Unigene0042438;Unigene0041173
M1	Molecular Function	GO:0030159	receptor signaling complex scaffold activity	4	2.37592e-05	0.000497993	Unigene0030297;Unigene0042156;Unigene0030265;Unigene0030267
M1	Molecular Function	GO:0099600	transmembrane receptor activity	59	3.83866e-05	0.000773638	Unigene0040837;Unigene0029098;Unigene0028615;Unigene0037587;Unigene0033125;Unigene0046609;Unigene0041430;Unigene0031642;Unigene0030145;Unigene0052657;Unigene0029804;Unigene0045169;Unigene0045735;Unigene0007779;Unigene0034559;Unigene0052593;Unigene0047209;Unigene0031714;Unigene0037263;Unigene0036303;Unigene0035225;Unigene0045558;Unigene0037266;Unigene0006096;Unigene0023537;Unigene0033196;Unigene00…
M1	Molecular Function	GO:0015079	potassium ion transmembrane transporter activity	12	4.21522e-05	0.000818064	Unigene0040076;Unigene0051337;Unigene0052237;Unigene0048323;Unigene0051393;Unigene0036404;Unigene0051334;Unigene0035405;Unigene0007364;Unigene0027949;Unigene0027995;Unigene0047742
M1	Molecular Function	GO:0016917	GABA receptor activity	4	0.00011218	0.00209937	Unigene0005066;Unigene0046609;Unigene0033125;Unigene0040652
M1	Molecular Function	GO:0005230	extracellular ligand-gated ion channel activity	10	0.000126347	0.00228296	Unigene0037263;Unigene0037266;Unigene0041430;Unigene0040837;Unigene0037340;Unigene0039266;Unigene0007779;Unigene0047384;Unigene0019228;Unigene0040652
M1	Molecular Function	GO:0015293	symporter activity	10	0.000162419	0.00268937	Unigene0040237;Unigene0044147;Unigene0030980;Unigene0044148;Unigene0049510;Unigene0031167;Unigene0041130;Unigene0031166;Unigene0050183;Unigene0006024
M1	Molecular Function	GO:0015294	solute:cation symporter activity	10	0.000162419	0.00268937	Unigene0040237;Unigene0044147;Unigene0030980;Unigene0044148;Unigene0049510;Unigene0031167;Unigene0041130;Unigene0031166;Unigene0050183;Unigene0006024
M1	Molecular Function	GO:0032947	protein complex scaffold	5	0.000164236	0.00268937	Unigene0030297;Unigene0042156;Unigene0030265;Unigene0030267;Unigene0040479
M1	Molecular Function	GO:0016247	channel regulator activity	16	0.000265597	0.00412743	Unigene0005460;Unigene0043489;Unigene0038613;Unigene0028102;Unigene0039394;Unigene0044255;Unigene0037340;Unigene0049494;Unigene0040076;Unigene0040404;Unigene0006096;Unigene0037485;Unigene0048155;Unigene0022976;Unigene0050884;Unigene0030145
M1	Molecular Function	GO:0015297	antiporter activity	7	0.000275687	0.00412743	Unigene0041173;Unigene0049392;Unigene0037103;Unigene0028762;Unigene0042438;Unigene0006903;Unigene0005616
M1	Molecular Function	GO:0099516	ion antiporter activity	7	0.000275687	0.00412743	Unigene0041173;Unigene0049392;Unigene0037103;Unigene0028762;Unigene0042438;Unigene0006903;Unigene0005616
M1	Molecular Function	GO:0008066	glutamate receptor activity	5	0.000309571	0.00450598	Unigene0037263;Unigene0037266;Unigene0041430;Unigene0040837;Unigene0006096
M1	Molecular Function	GO:0005231	excitatory extracellular ligand-gated ion channel activity	8	0.000370875	0.0052524	Unigene0037340;Unigene0041430;Unigene0039266;Unigene0007779;Unigene0040837;Unigene0037263;Unigene0037266;Unigene0047384
M1	Molecular Function	GO:0004888	transmembrane signaling receptor activity	52	0.000435949	0.0060115	Unigene0040837;Unigene0029098;Unigene0028615;Unigene0037587;Unigene0033125;Unigene0046609;Unigene0041430;Unigene0031642;Unigene0030145;Unigene0052657;Unigene0029804;Unigene0045169;Unigene0045735;Unigene0007779;Unigene0034559;Unigene0052593;Unigene0047209;Unigene0031714;Unigene0037263;Unigene0036303;Unigene0035225;Unigene0045558;Unigene0037266;Unigene0006096;Unigene0023537;Unigene0033196;Unigene00…
M1	Molecular Function	GO:0008092	cytoskeletal protein binding	62	0.000629838	0.00846244	Unigene0031779;Unigene0042977;Unigene0034553;Unigene0043793;Unigene0035892;Unigene0051477;Unigene0004831;Unigene0032515;Unigene0005010;Unigene0043132;Unigene0030297;Unigene0039883;Unigene0043489;Unigene0008865;Unigene0045419;Unigene0042498;Unigene0050365;Unigene0030267;Unigene0049205;Unigene0043128;Unigene0051041;Unigene0005555;Unigene0007544;Unigene0040729;Unigene0006602;Unigene0037805;Unigene00…
M1	Molecular Function	GO:0001664	G-protein coupled receptor binding	17	0.000662911	0.00868413	Unigene0028615;Unigene0028379;Unigene0031200;Unigene0040479;Unigene0000627;Unigene0002819;Unigene0042337;Unigene0039605;Unigene0037805;Unigene0051334;Unigene0024532;Unigene0034200;Unigene0006971;Unigene0046045;Unigene0042156;Unigene0034553;Unigene0050822
M1	Biological Process	GO:0044708	single-organism behavior	76	1.85018e-29	4.65691e-26	Unigene0040837;Unigene0041310;Unigene0006121;Unigene0052239;Unigene0036303;Unigene0035971;Unigene0039317;Unigene0006716;Unigene0006024;Unigene0047384;Unigene0035193;Unigene0030980;Unigene0035516;Unigene0037340;Unigene0033840;Unigene0051334;Unigene0030297;Unigene0007779;Unigene0042156;Unigene0004512;Unigene0052470;Unigene0043375;Unigene0048008;Unigene0004293;Unigene0030267;Unigene0044148;Unigene00…
M1	Biological Process	GO:0050804	modulation of synaptic transmission	57	1.25815e-26	1.18982e-23	Unigene0004831;Unigene0035552;Unigene0035551;Unigene0000280;Unigene0032955;Unigene0035516;Unigene0030265;Unigene0002819;Unigene0043164;Unigene0045081;Unigene0030267;Unigene0044139;Unigene0030297;Unigene0030040;Unigene0043375;Unigene0047372;Unigene0033648;Unigene0003934;Unigene0044642;Unigene0040837;Unigene0036303;Unigene0004519;Unigene0034569;Unigene0047373;Unigene0049477;Unigene0004293;Unigene00…
M1	Biological Process	GO:0007399	nervous system development	166	1.41815e-26	1.18982e-23	Unigene0047384;Unigene0043375;Unigene0032955;Unigene0045652;Unigene0031714;Unigene0007779;Unigene0050354;Unigene0044051;Unigene0005046;Unigene0039317;Unigene0025554;Unigene0040559;Unigene0035021;Unigene0036341;Unigene0022483;Unigene0011918;Unigene0012599;Unigene0037311;Unigene0025555;Unigene0048481;Unigene0023349;Unigene0000280;Unigene0004728;Unigene0035971;Unigene0049549;Unigene0030267;Unigene00…
M1	Biological Process	GO:0048699	generation of neurons	131	4.00095e-25	2.5176e-22	Unigene0050354;Unigene0044051;Unigene0005046;Unigene0039317;Unigene0048481;Unigene0023349;Unigene0000280;Unigene0004728;Unigene0035971;Unigene0049549;Unigene0030267;Unigene0040479;Unigene0005524;Unigene0032955;Unigene0045597;Unigene0029184;Unigene0046834;Unigene0000239;Unigene0030265;Unigene0035516;Unigene0034569;Unigene0044642;Unigene0049742;Unigene0038613;Unigene0008647;Unigene0030297;Unigene00…
M1	Biological Process	GO:0007610	behavior	96	5.69391e-25	2.86632e-22	Unigene0040837;Unigene0041310;Unigene0006121;Unigene0052239;Unigene0036303;Unigene0035971;Unigene0039317;Unigene0006716;Unigene0006024;Unigene0047384;Unigene0035193;Unigene0030980;Unigene0035516;Unigene0037340;Unigene0033840;Unigene0051334;Unigene0030297;Unigene0007779;Unigene0042156;Unigene0004512;Unigene0052470;Unigene0043375;Unigene0048008;Unigene0004293;Unigene0030267;Unigene0044148;Unigene00…
M1	Biological Process	GO:0022008	neurogenesis	134	3.13418e-24	1.31479e-21	Unigene0050354;Unigene0044051;Unigene0005046;Unigene0039317;Unigene0048481;Unigene0023349;Unigene0000280;Unigene0004728;Unigene0035971;Unigene0049549;Unigene0030267;Unigene0040479;Unigene0005524;Unigene0032955;Unigene0045597;Unigene0029184;Unigene0046834;Unigene0000239;Unigene0030265;Unigene0035516;Unigene0034569;Unigene0044642;Unigene0049742;Unigene0038613;Unigene0008647;Unigene0030297;Unigene00…
M1	Biological Process	GO:0050877	neurological system process	99	6.07512e-21	2.18444e-18	Unigene0040837;Unigene0020303;Unigene0043962;Unigene0041310;Unigene0006121;Unigene0052239;Unigene0036303;Unigene0035971;Unigene0039317;Unigene0006716;Unigene0006024;Unigene0047384;Unigene0035193;Unigene0030980;Unigene0035516;Unigene0037340;Unigene0033840;Unigene0051334;Unigene0030297;Unigene0007779;Unigene0042156;Unigene0004512;Unigene0052470;Unigene0043375;Unigene0048008;Unigene0004293;Unigene00…
M1	Biological Process	GO:0030182	neuron differentiation	101	2.16492e-20	6.81138e-18	Unigene0050354;Unigene0044051;Unigene0005046;Unigene0039317;Unigene0048481;Unigene0053537;Unigene0029621;Unigene0025938;Unigene0022483;Unigene0036858;Unigene0029807;Unigene0043356;Unigene0044255;Unigene0042489;Unigene0041584;Unigene0046075;Unigene0046045;Unigene0015406;Unigene0005954;Unigene0045842;Unigene0038613;Unigene0027316;Unigene0002345;Unigene0002437;Unigene0041412;Unigene0005643;Unigene00…
M1	Biological Process	GO:0007267	cell-cell signaling	62	8.12436e-20	2.27211e-17	Unigene0036303;Unigene0047815;Unigene0040837;Unigene0045718;Unigene0006625;Unigene0036738;Unigene0030980;Unigene0005066;Unigene0040652;Unigene0009034;Unigene0037340;Unigene0039317;Unigene0001708;Unigene0002819;Unigene0024040;Unigene0030363;Unigene0049261;Unigene0041430;Unigene0039266;Unigene0051878;Unigene0051601;Unigene0007779;Unigene0000100;Unigene0047384;Unigene0037423;Unigene0051835;Unigene00…
M1	Biological Process	GO:0048666	neuron development	89	1.8039e-19	4.54042e-17	Unigene0050354;Unigene0044051;Unigene0005046;Unigene0039317;Unigene0036858;Unigene0029807;Unigene0043356;Unigene0044255;Unigene0042489;Unigene0041584;Unigene0046075;Unigene0046045;Unigene0015406;Unigene0005954;Unigene0045842;Unigene0038613;Unigene0027316;Unigene0002345;Unigene0002437;Unigene0041412;Unigene0005643;Unigene0020272;Unigene0028507;Unigene0040531;Unigene0035021;Unigene0020013;Unigene00…
M1	Biological Process	GO:0007611	learning or memory	39	1.00935e-17	2.04817e-15	Unigene0040837;Unigene0041310;Unigene0006121;Unigene0052239;Unigene0036303;Unigene0035971;Unigene0039317;Unigene0006716;Unigene0006024;Unigene0047384;Unigene0035193;Unigene0030980;Unigene0035516;Unigene0037340;Unigene0033840;Unigene0051334;Unigene0030297;Unigene0007779;Unigene0042156;Unigene0004512;Unigene0052470;Unigene0043375;Unigene0048008;Unigene0004293;Unigene0030267;Unigene0044148;Unigene00…
M1	Biological Process	GO:0050890	cognition	39	1.00935e-17	2.04817e-15	Unigene0040837;Unigene0041310;Unigene0006121;Unigene0052239;Unigene0036303;Unigene0035971;Unigene0039317;Unigene0006716;Unigene0006024;Unigene0047384;Unigene0035193;Unigene0030980;Unigene0035516;Unigene0037340;Unigene0033840;Unigene0051334;Unigene0030297;Unigene0007779;Unigene0042156;Unigene0004512;Unigene0052470;Unigene0043375;Unigene0048008;Unigene0004293;Unigene0030267;Unigene0044148;Unigene00…
M1	Biological Process	GO:0031175	neuron projection development	77	1.05786e-17	2.04817e-15	Unigene0050354;Unigene0044051;Unigene0005046;Unigene0039317;Unigene0029807;Unigene0043356;Unigene0044255;Unigene0042489;Unigene0041584;Unigene0046075;Unigene0046045;Unigene0015406;Unigene0005954;Unigene0045842;Unigene0038613;Unigene0027316;Unigene0002345;Unigene0002437;Unigene0041412;Unigene0005643;Unigene0020272;Unigene0028507;Unigene0040531;Unigene0035021;Unigene0020013;Unigene0004916;Unigene00…
M1	Biological Process	GO:0048812	neuron projection morphogenesis	70	7.37041e-16	1.32509e-13	Unigene0050354;Unigene0044051;Unigene0005046;Unigene0039317;Unigene0029807;Unigene0043356;Unigene0044255;Unigene0042489;Unigene0041584;Unigene0046075;Unigene0046045;Unigene0015406;Unigene0005954;Unigene0045842;Unigene0038613;Unigene0027316;Unigene0002345;Unigene0002437;Unigene0041412;Unigene0005643;Unigene0020272;Unigene0028507;Unigene0040531;Unigene0035021;Unigene0020013;Unigene0004916;Unigene00…
M1	Biological Process	GO:0050803	regulation of synapse structure or activity	31	1.95382e-15	3.27851e-13	Unigene0030297;Unigene0030040;Unigene0030265;Unigene0043375;Unigene0030267;Unigene0044642;Unigene0035021;Unigene0035516;Unigene0043135;Unigene0047372;Unigene0033648;Unigene0003934;Unigene0040837;Unigene0036303;Unigene0004519;Unigene0034569;Unigene0047373;Unigene0049477;Unigene0004293;Unigene0003755;Unigene0004512;Unigene0007228;Unigene0039317;Unigene0039777;Unigene0029807;Unigene0004831;Unigene00…
M1	Biological Process	GO:0001505	regulation of neurotransmitter levels	28	3.08849e-15	4.85858e-13	Unigene0004831;Unigene0035552;Unigene0035551;Unigene0030363;Unigene0049261;Unigene0043386;Unigene0030980;Unigene0051337;Unigene0045081;Unigene0050328;Unigene0003698;Unigene0022533;Unigene0007112;Unigene0042116;Unigene0031606;Unigene0006716;Unigene0039777;Unigene0044255;Unigene0007228;Unigene0040404;Unigene0041169;Unigene0040829;Unigene0006024;Unigene0045581;Unigene0039819;Unigene0041737;Unigene00…
M1	Biological Process	GO:0032501	multicellular organismal process	364	6.77757e-15	1.00348e-12	Unigene0045581;Unigene0046038;Unigene0047384;Unigene0043375;Unigene0032955;Unigene0045652;Unigene0031714;Unigene0007779;Unigene0050354;Unigene0044051;Unigene0005046;Unigene0039317;Unigene0022780;Unigene0052657;Unigene0036376;Unigene0043408;Unigene0025554;Unigene0040559;Unigene0035021;Unigene0036341;Unigene0022483;Unigene0011918;Unigene0012599;Unigene0037311;Unigene0025555;Unigene0032515;Unigene00…
M1	Biological Process	GO:0007626	locomotory behavior	32	1.66164e-14	2.32352e-12	Unigene0036341;Unigene0043132;Unigene0004655;Unigene0006089;Unigene0030674;Unigene0043128;Unigene0021374;Unigene0020013;Unigene0012599;Unigene0000627;Unigene0048373;Unigene0044051;Unigene0039777;Unigene0002437;Unigene0021641;Unigene0030297;Unigene0041202;Unigene0028524;Unigene0040837;Unigene0029807;Unigene0051733;Unigene0044217;Unigene0002819;Unigene0030267;Unigene0050364;Unigene0009004;Unigene00…
M1	Biological Process	GO:0048167	regulation of synaptic plasticity	28	2.79945e-14	3.70854e-12	Unigene0030297;Unigene0030040;Unigene0030265;Unigene0043375;Unigene0030267;Unigene0047372;Unigene0033648;Unigene0003934;Unigene0044642;Unigene0040837;Unigene0036303;Unigene0004519;Unigene0034569;Unigene0047373;Unigene0049477;Unigene0004293;Unigene0003755;Unigene0004512;Unigene0007228;Unigene0039317;Unigene0039777;Unigene0029807;Unigene0004831;Unigene0048008;Unigene0005524;Unigene0005885;Unigene00…
M1	Biological Process	GO:0030030	cell projection organization	97	2.04403e-13	2.57241e-11	Unigene0050354;Unigene0044051;Unigene0005046;Unigene0039317;Unigene0031975;Unigene0052237;Unigene0015406;Unigene0052624;Unigene0035021;Unigene0043128;Unigene0033196;Unigene0040531;Unigene0029807;Unigene0043132;Unigene0008584;Unigene0030288;Unigene0009080;Unigene0043375;Unigene0038701;Unigene0012776;Unigene0032955;Unigene0042156;Unigene0042117;Unigene0039330;Unigene0042116;Unigene0029825;Unigene00…
M1	Biological Process	GO:0044707	single-multicellular organism process	319	2.38512e-13	2.85874e-11	Unigene0045581;Unigene0046038;Unigene0047384;Unigene0043375;Unigene0032955;Unigene0045652;Unigene0031714;Unigene0007779;Unigene0050354;Unigene0044051;Unigene0005046;Unigene0039317;Unigene0022780;Unigene0052657;Unigene0036376;Unigene0043408;Unigene0025554;Unigene0040559;Unigene0035021;Unigene0036341;Unigene0022483;Unigene0011918;Unigene0012599;Unigene0037311;Unigene0025555;Unigene0032515;Unigene00…
M1	Biological Process	GO:0032990	cell part morphogenesis	77	2.72477e-13	2.98185e-11	Unigene0050354;Unigene0044051;Unigene0005046;Unigene0039317;Unigene0031975;Unigene0052237;Unigene0015406;Unigene0052624;Unigene0035021;Unigene0043128;Unigene0033196;Unigene0040531;Unigene0029807;Unigene0043132;Unigene0008584;Unigene0030288;Unigene0009080;Unigene0043375;Unigene0038701;Unigene0012776;Unigene0032955;Unigene0042156;Unigene0042117;Unigene0039330;Unigene0042116;Unigene0029825;Unigene00…
M1	Biological Process	GO:0048858	cell projection morphogenesis	77	2.72477e-13	2.98185e-11	Unigene0050354;Unigene0044051;Unigene0005046;Unigene0039317;Unigene0031975;Unigene0052237;Unigene0015406;Unigene0052624;Unigene0035021;Unigene0043128;Unigene0033196;Unigene0040531;Unigene0029807;Unigene0043132;Unigene0008584;Unigene0030288;Unigene0009080;Unigene0043375;Unigene0038701;Unigene0012776;Unigene0032955;Unigene0042156;Unigene0042117;Unigene0039330;Unigene0042116;Unigene0029825;Unigene00…
M1	Biological Process	GO:0048731	system development	247	3.31428e-13	3.47585e-11	Unigene0047384;Unigene0043375;Unigene0032955;Unigene0045652;Unigene0031714;Unigene0007779;Unigene0050354;Unigene0044051;Unigene0005046;Unigene0039317;Unigene0022780;Unigene0052657;Unigene0036376;Unigene0043408;Unigene0025554;Unigene0040559;Unigene0035021;Unigene0036341;Unigene0022483;Unigene0011918;Unigene0012599;Unigene0037311;Unigene0025555;Unigene0032515;Unigene0036303;Unigene0039760;Unigene00…
M1	Biological Process	GO:0003008	system process	120	1.67792e-12	1.68933e-10	Unigene0036303;Unigene0044642;Unigene0050884;Unigene0052657;Unigene0040837;Unigene0051888;Unigene0034200;Unigene0037103;Unigene0047742;Unigene0033840;Unigene0050078;Unigene0052470;Unigene0027753;Unigene0042337;Unigene0040479;Unigene0040719;Unigene0020303;Unigene0048985;Unigene0043962;Unigene0050264;Unigene0051337;Unigene0041310;Unigene0006121;Unigene0052239;Unigene0035971;Unigene0039317;Unigene00…
M1	Biological Process	GO:0048468	cell development	123	2.05615e-12	1.99051e-10	Unigene0040479;Unigene0053537;Unigene0032955;Unigene0034200;Unigene0029621;Unigene0006551;Unigene0041173;Unigene0050354;Unigene0044051;Unigene0005046;Unigene0039317;Unigene0036858;Unigene0029807;Unigene0043356;Unigene0044255;Unigene0042489;Unigene0041584;Unigene0046075;Unigene0046045;Unigene0015406;Unigene0005954;Unigene0045842;Unigene0038613;Unigene0027316;Unigene0002345;Unigene0002437;Unigene00…
M1	Biological Process	GO:0030534	adult behavior	23	2.28119e-12	2.12657e-10	Unigene0036341;Unigene0043132;Unigene0004655;Unigene0006089;Unigene0030674;Unigene0043128;Unigene0021374;Unigene0020013;Unigene0012599;Unigene0000627;Unigene0048373;Unigene0044051;Unigene0039777;Unigene0002437;Unigene0021641;Unigene0047384;Unigene0039266;Unigene0022533;Unigene0007779;Unigene0045710;Unigene0039317;Unigene0036303;Unigene0037340
M1	Biological Process	GO:0030154	cell differentiation	203	5.82664e-12	5.23773e-10	Unigene0040479;Unigene0053537;Unigene0032955;Unigene0034200;Unigene0029621;Unigene0006551;Unigene0041173;Unigene0050354;Unigene0044051;Unigene0005046;Unigene0039317;Unigene0048481;Unigene0046832;Unigene0044297;Unigene0005643;Unigene0041169;Unigene0043408;Unigene0025555;Unigene0023349;Unigene0000280;Unigene0004728;Unigene0035971;Unigene0049549;Unigene0030267;Unigene0005524;Unigene0045597;Unigene00…
M1	Biological Process	GO:0000902	cell morphogenesis	83	1.01558e-11	8.81452e-10	Unigene0050354;Unigene0044051;Unigene0005046;Unigene0039317;Unigene0031975;Unigene0052237;Unigene0015406;Unigene0052624;Unigene0035021;Unigene0043128;Unigene0033196;Unigene0040531;Unigene0029807;Unigene0043132;Unigene0008584;Unigene0030288;Unigene0009080;Unigene0043375;Unigene0038701;Unigene0012776;Unigene0032955;Unigene0042156;Unigene0042117;Unigene0039330;Unigene0042116;Unigene0029825;Unigene00…
M1	Biological Process	GO:0007275	multicellular organism development	258	3.11269e-11	2.61154e-09	Unigene0047384;Unigene0043375;Unigene0032955;Unigene0045652;Unigene0031714;Unigene0007779;Unigene0050354;Unigene0044051;Unigene0005046;Unigene0039317;Unigene0022780;Unigene0052657;Unigene0036376;Unigene0043408;Unigene0025554;Unigene0040559;Unigene0035021;Unigene0036341;Unigene0022483;Unigene0011918;Unigene0012599;Unigene0037311;Unigene0025555;Unigene0032515;Unigene0036303;Unigene0039760;Unigene00…
M1	Biological Process	GO:0007417	central nervous system development	68	4.52373e-11	3.67298e-09	Unigene0025554;Unigene0040559;Unigene0035021;Unigene0036341;Unigene0022483;Unigene0011918;Unigene0012599;Unigene0037311;Unigene0025555;Unigene0048909;Unigene0048373;Unigene0015559;Unigene0039690;Unigene0029371;Unigene0008027;Unigene0030852;Unigene0039653;Unigene0042171;Unigene0043375;Unigene0044882;Unigene0049029;Unigene0039317;Unigene0069345;Unigene0030794;Unigene0020013;Unigene0041412;Unigene00…
M1	Biological Process	GO:0007268	synaptic transmission	26	7.24512e-11	5.25e-09	Unigene0047815;Unigene0040837;Unigene0045718;Unigene0006625;Unigene0036738;Unigene0030980;Unigene0005066;Unigene0040652;Unigene0009034;Unigene0037340;Unigene0039317;Unigene0001708;Unigene0002819;Unigene0024040;Unigene0030363;Unigene0049261;Unigene0043386;Unigene0037423;Unigene0051601;Unigene0047384;Unigene0051878;Unigene0051835;Unigene0007779;Unigene0039266;Unigene0000100;Unigene0041430
M1	Biological Process	GO:0099536	synaptic signaling	26	7.24512e-11	5.25e-09	Unigene0047815;Unigene0040837;Unigene0045718;Unigene0006625;Unigene0036738;Unigene0030980;Unigene0005066;Unigene0040652;Unigene0009034;Unigene0037340;Unigene0039317;Unigene0001708;Unigene0002819;Unigene0024040;Unigene0030363;Unigene0049261;Unigene0041430;Unigene0039266;Unigene0051878;Unigene0051601;Unigene0007779;Unigene0000100;Unigene0047384;Unigene0037423;Unigene0051835;Unigene0043386
M1	Biological Process	GO:0099537	trans-synaptic signaling	26	7.24512e-11	5.25e-09	Unigene0047815;Unigene0040837;Unigene0045718;Unigene0006625;Unigene0036738;Unigene0030980;Unigene0005066;Unigene0040652;Unigene0009034;Unigene0037340;Unigene0039317;Unigene0001708;Unigene0002819;Unigene0024040;Unigene0030363;Unigene0049261;Unigene0043386;Unigene0037423;Unigene0051601;Unigene0047384;Unigene0051878;Unigene0051835;Unigene0007779;Unigene0039266;Unigene0000100;Unigene0041430
M1	Biological Process	GO:0048869	cellular developmental process	220	7.30036e-11	5.25e-09	Unigene0040479;Unigene0053537;Unigene0032955;Unigene0034200;Unigene0029621;Unigene0006551;Unigene0041173;Unigene0050354;Unigene0044051;Unigene0005046;Unigene0039317;Unigene0045995;Unigene0009004;Unigene0000865;Unigene0015406;Unigene0051030;Unigene0005524;Unigene0047384;Unigene0030449;Unigene0051016;Unigene0045233;Unigene0049067;Unigene0036704;Unigene0041412;Unigene0038613;Unigene0029825;Unigene00…
M1	Biological Process	GO:0048168	regulation of neuronal synaptic plasticity	14	2.09171e-10	1.46245e-08	Unigene0030297;Unigene0030040;Unigene0030265;Unigene0043375;Unigene0030267;Unigene0004831;Unigene0003755;Unigene0047815;Unigene0040837;Unigene0044642;Unigene0039777;Unigene0029807;Unigene0007228;Unigene0005885
M1	Biological Process	GO:0048856	anatomical structure development	292	5.59643e-10	3.80708e-08	Unigene0040479;Unigene0053537;Unigene0032955;Unigene0034200;Unigene0029621;Unigene0006551;Unigene0041173;Unigene0047384;Unigene0043375;Unigene0045652;Unigene0031714;Unigene0007779;Unigene0050354;Unigene0044051;Unigene0005046;Unigene0039317;Unigene0022780;Unigene0052657;Unigene0036376;Unigene0043408;Unigene0025554;Unigene0040559;Unigene0035021;Unigene0036341;Unigene0022483;Unigene0011918;Unigene00…
M1	Biological Process	GO:0006811	ion transport	109	1.06546e-09	7.05724e-08	Unigene0030980;Unigene0019228;Unigene0043256;Unigene0024040;Unigene0049654;Unigene0029536;Unigene0045034;Unigene0005066;Unigene0034535;Unigene0040652;Unigene0005291;Unigene0046609;Unigene0005239;Unigene0044148;Unigene0044147;Unigene0033125;Unigene0035775;Unigene0052119;Unigene0033726;Unigene0005616;Unigene0002956;Unigene0049494;Unigene0042438;Unigene0028762;Unigene0007364;Unigene0031642;Unigene00…
M1	Biological Process	GO:0051960	regulation of nervous system development	48	1.17335e-09	7.57262e-08	Unigene0023349;Unigene0000280;Unigene0004728;Unigene0035971;Unigene0049549;Unigene0030267;Unigene0040479;Unigene0005524;Unigene0032955;Unigene0045597;Unigene0029184;Unigene0039317;Unigene0046834;Unigene0000239;Unigene0030265;Unigene0035516;Unigene0034569;Unigene0044642;Unigene0049742;Unigene0038613;Unigene0008647;Unigene0030297;Unigene0032441;Unigene0047209;Unigene0036341;Unigene0032581;Unigene00…
M1	Biological Process	GO:0008344	adult locomotory behavior	15	5.83398e-09	3.67103e-07	Unigene0036341;Unigene0043132;Unigene0004655;Unigene0006089;Unigene0030674;Unigene0043128;Unigene0021374;Unigene0020013;Unigene0012599;Unigene0000627;Unigene0048373;Unigene0044051;Unigene0039777;Unigene0002437;Unigene0021641
M1	Biological Process	GO:0050806	positive regulation of synaptic transmission	10	8.16654e-09	5.01346e-07	Unigene0000280;Unigene0032955;Unigene0035516;Unigene0030265;Unigene0002819;Unigene0043164;Unigene0045081;Unigene0030267;Unigene0044139;Unigene0030297
M1	Biological Process	GO:0050767	regulation of neurogenesis	43	1.12851e-08	6.763e-07	Unigene0023349;Unigene0000280;Unigene0004728;Unigene0035971;Unigene0049549;Unigene0030267;Unigene0040479;Unigene0005524;Unigene0032955;Unigene0045597;Unigene0029184;Unigene0039317;Unigene0046834;Unigene0000239;Unigene0030265;Unigene0035516;Unigene0034569;Unigene0044642;Unigene0049742;Unigene0038613;Unigene0008647;Unigene0030297;Unigene0032441;Unigene0047209;Unigene0036341;Unigene0032581;Unigene00…
M1	Biological Process	GO:0061564	axon development	25	1.20151e-08	7.03304e-07	Unigene0043375;Unigene0045842;Unigene0043132;Unigene0047384;Unigene0015559;Unigene0050354;Unigene0043128;Unigene0007779;Unigene0020013;Unigene0031714;Unigene0028507;Unigene0025555;Unigene0033905;Unigene0005643;Unigene0038613;Unigene0025938;Unigene0046045;Unigene0034471;Unigene0053537;Unigene0052624;Unigene0039317;Unigene0032955;Unigene0002323;Unigene0041584;Unigene0038300
M1	Biological Process	GO:0007409	axonogenesis	24	2.26541e-08	1.26712e-06	Unigene0043375;Unigene0045842;Unigene0043132;Unigene0047384;Unigene0015559;Unigene0050354;Unigene0043128;Unigene0007779;Unigene0020013;Unigene0031714;Unigene0028507;Unigene0025555;Unigene0033905;Unigene0005643;Unigene0038613;Unigene0025938;Unigene0046045;Unigene0034471;Unigene0053537;Unigene0052624;Unigene0039317;Unigene0032955;Unigene0002323;Unigene0041584
M1	Biological Process	GO:0048667	cell morphogenesis involved in neuron differentiation	24	2.26541e-08	1.26712e-06	Unigene0043375;Unigene0045842;Unigene0043132;Unigene0047384;Unigene0015559;Unigene0050354;Unigene0043128;Unigene0007779;Unigene0020013;Unigene0031714;Unigene0028507;Unigene0025555;Unigene0033905;Unigene0005643;Unigene0038613;Unigene0025938;Unigene0046045;Unigene0034471;Unigene0053537;Unigene0052624;Unigene0039317;Unigene0032955;Unigene0041584;Unigene0002323
M1	Biological Process	GO:0042391	regulation of membrane potential	31	2.55515e-08	1.39811e-06	Unigene0038613;Unigene0051337;Unigene0050884;Unigene0022976;Unigene0052657;Unigene0032515;Unigene0048155;Unigene0021641;Unigene0032792;Unigene0039317;Unigene0037263;Unigene0040837;Unigene0037266;Unigene0030980;Unigene0035516;Unigene0004831;Unigene0039266;Unigene0028102;Unigene0030297;Unigene0000280;Unigene0030267;Unigene0045081;Unigene0030265;Unigene0042156;Unigene0002641;Unigene0033726;Unigene00…
M1	Biological Process	GO:0051899	membrane depolarization	13	3.17463e-08	1.70012e-06	Unigene0038613;Unigene0051337;Unigene0050884;Unigene0022976;Unigene0039317;Unigene0037263;Unigene0040837;Unigene0037266;Unigene0030980;Unigene0035516;Unigene0004831;Unigene0039266;Unigene0028102
M1	Biological Process	GO:0030001	metal ion transport	58	4.58967e-08	2.40671e-06	Unigene0035775;Unigene0051337;Unigene0051334;Unigene0039394;Unigene0007364;Unigene0022976;Unigene0028762;Unigene0036092;Unigene0047013;Unigene0040237;Unigene0041573;Unigene0005117;Unigene0031642;Unigene0043489;Unigene0033726;Unigene0006096;Unigene0005586;Unigene0039777;Unigene0049397;Unigene0002803;Unigene0047742;Unigene0049494;Unigene0044642;Unigene0005460;Unigene0046559;Unigene0052119;Unigene00…
M1	Biological Process	GO:0007270	neuron-neuron synaptic transmission	14	1.25708e-07	6.4573e-06	Unigene0047815;Unigene0040837;Unigene0045718;Unigene0006625;Unigene0036738;Unigene0030980;Unigene0005066;Unigene0040652;Unigene0009034;Unigene0037340;Unigene0039317;Unigene0001708;Unigene0002819;Unigene0024040
M1	Biological Process	GO:0007625	grooming behavior	6	1.42483e-07	7.17258e-06	Unigene0045081;Unigene0030265;Unigene0030267;Unigene0029807;Unigene0045718;Unigene0030297
M1	Biological Process	GO:0044767	single-organism developmental process	297	2.09245e-07	1.03268e-05	Unigene0040479;Unigene0053537;Unigene0032955;Unigene0034200;Unigene0029621;Unigene0006551;Unigene0041173;Unigene0047384;Unigene0043375;Unigene0045652;Unigene0031714;Unigene0007779;Unigene0050354;Unigene0044051;Unigene0005046;Unigene0039317;Unigene0022780;Unigene0052657;Unigene0036376;Unigene0043408;Unigene0025554;Unigene0040559;Unigene0035021;Unigene0036341;Unigene0022483;Unigene0011918;Unigene00…
M1	Biological Process	GO:0051179	localization	310	2.75035e-07	1.33128e-05	Unigene0030980;Unigene0047815;Unigene0036303;Unigene0019228;Unigene0043256;Unigene0024040;Unigene0049654;Unigene0029536;Unigene0045034;Unigene0005066;Unigene0034535;Unigene0040652;Unigene0005291;Unigene0046609;Unigene0005239;Unigene0044148;Unigene0044147;Unigene0033125;Unigene0049852;Unigene0046038;Unigene0037590;Unigene0051477;Unigene0044311;Unigene0028238;Unigene0042489;Unigene0022780;Unigene00…
M1	Biological Process	GO:0007612	learning	11	2.82583e-07	1.342e-05	Unigene0040837;Unigene0006716;Unigene0037340;Unigene0039317;Unigene0007779;Unigene0000280;Unigene0047384;Unigene0033125;Unigene0042156;Unigene0004293;Unigene0006096
M1	Biological Process	GO:0021953	central nervous system neuron differentiation	22	3.01576e-07	1.40568e-05	Unigene0025938;Unigene0047384;Unigene0031714;Unigene0043375;Unigene0043132;Unigene0020013;Unigene0045842;Unigene0015559;Unigene0043128;Unigene0007779;Unigene0028507;Unigene0050354;Unigene0069345;Unigene0030267;Unigene0029371;Unigene0025554;Unigene0030265;Unigene0004747;Unigene0053537;Unigene0030297;Unigene0022483;Unigene0029621
M1	Biological Process	GO:0032502	developmental process	313	3.54742e-07	1.62343e-05	Unigene0040479;Unigene0053537;Unigene0032955;Unigene0034200;Unigene0029621;Unigene0006551;Unigene0041173;Unigene0047384;Unigene0043375;Unigene0045652;Unigene0031714;Unigene0007779;Unigene0050354;Unigene0044051;Unigene0005046;Unigene0039317;Unigene0022780;Unigene0052657;Unigene0036376;Unigene0043408;Unigene0025554;Unigene0040559;Unigene0035021;Unigene0036341;Unigene0022483;Unigene0011918;Unigene00…
M1	Biological Process	GO:0032989	cellular component morphogenesis	85	3.81557e-07	1.71496e-05	Unigene0050354;Unigene0044051;Unigene0005046;Unigene0039317;Unigene0031975;Unigene0052237;Unigene0015406;Unigene0052624;Unigene0035021;Unigene0043128;Unigene0033196;Unigene0040531;Unigene0029807;Unigene0043132;Unigene0008584;Unigene0030288;Unigene0009080;Unigene0043375;Unigene0038701;Unigene0012776;Unigene0032955;Unigene0042156;Unigene0042117;Unigene0039330;Unigene0042116;Unigene0029825;Unigene00…
M1	Biological Process	GO:0007600	sensory perception	48	4.05086e-07	1.78877e-05	Unigene0020303;Unigene0043962;Unigene0043291;Unigene0046609;Unigene0039317;Unigene0025785;Unigene0047370;Unigene0035168;Unigene0030674;Unigene0000627;Unigene0056086;Unigene0039760;Unigene0033125;Unigene0040652;Unigene0029621;Unigene0050078;Unigene0045781;Unigene0007779;Unigene0027186;Unigene0020013;Unigene0051733;Unigene0039605;Unigene0045652;Unigene0039777;Unigene0006096;Unigene0032021;Unigene00…
M1	Biological Process	GO:0060284	regulation of cell development	60	4.73912e-07	2.02886e-05	Unigene0020272;Unigene0039106;Unigene0032813;Unigene0052340;Unigene0028102;Unigene0043375;Unigene0036341;Unigene0029548;Unigene0040560;Unigene0036858;Unigene0031208;Unigene0029621;Unigene0005643;Unigene0043947;Unigene0023349;Unigene0000280;Unigene0004728;Unigene0035971;Unigene0049549;Unigene0030267;Unigene0040479;Unigene0005524;Unigene0032955;Unigene0045597;Unigene0029184;Unigene0039317;Unigene00…
M1	Biological Process	GO:0051049	regulation of transport	93	4.75578e-07	2.02886e-05	Unigene0037536;Unigene0046749;Unigene0040479;Unigene0042337;Unigene0004831;Unigene0035552;Unigene0035551;Unigene0052657;Unigene0051337;Unigene0048373;Unigene0006971;Unigene0051041;Unigene0039317;Unigene0042585;Unigene0033555;Unigene0042117;Unigene0029621;Unigene0045857;Unigene0041412;Unigene0032660;Unigene0036303;Unigene0045081;Unigene0049510;Unigene0043489;Unigene0036858;Unigene0052778;Unigene00…
M1	Biological Process	GO:0006812	cation transport	71	5.24443e-07	2.20004e-05	Unigene0035775;Unigene0052119;Unigene0033726;Unigene0005616;Unigene0002956;Unigene0049494;Unigene0042438;Unigene0028762;Unigene0007364;Unigene0031642;Unigene0051393;Unigene0046038;Unigene0043128;Unigene0031167;Unigene0049397;Unigene0043962;Unigene0006716;Unigene0046559;Unigene0039266;Unigene0051334;Unigene0028322;Unigene0005117;Unigene0027995;Unigene0037340;Unigene0051337;Unigene0052237;Unigene00…
M1	Biological Process	GO:0007613	memory	10	1.09923e-06	4.53566e-05	Unigene0006096;Unigene0035807;Unigene0049477;Unigene0040837;Unigene0000280;Unigene0030980;Unigene0042156;Unigene0052470;Unigene0051878;Unigene0033840
M1	Biological Process	GO:0043269	regulation of ion transport	38	1.47188e-06	5.97535e-05	Unigene0052657;Unigene0051337;Unigene0051016;Unigene0030265;Unigene0017987;Unigene0000280;Unigene0030267;Unigene0035516;Unigene0030297;Unigene0040076;Unigene0006971;Unigene0036303;Unigene0048008;Unigene0045857;Unigene0037263;Unigene0037266;Unigene0004831;Unigene0052778;Unigene0036858;Unigene0043489;Unigene0028524;Unigene0006096;Unigene0048155;Unigene0007779;Unigene0049494;Unigene0038613;Unigene00…
M1	Biological Process	GO:0048169	regulation of long-term neuronal synaptic plasticity	5	1.97655e-06	7.89681e-05	Unigene0030297;Unigene0030040;Unigene0030265;Unigene0043375;Unigene0030267
M1	Biological Process	GO:0050954	sensory perception of mechanical stimulus	27	2.3081e-06	9.07734e-05	Unigene0048481;Unigene0052593;Unigene0020013;Unigene0030674;Unigene0045652;Unigene0043128;Unigene0046609;Unigene0006096;Unigene0047370;Unigene0052778;Unigene0043132;Unigene0045233;Unigene0002819;Unigene0050078;Unigene0032955;Unigene0047384;Unigene0003903;Unigene0045781;Unigene0007779;Unigene0017987;Unigene0051733;Unigene0025247;Unigene0052051;Unigene0039760;Unigene0033125;Unigene0040652;Unigene00…
M1	Biological Process	GO:0051703	intraspecies interaction between organisms	15	2.50142e-06	9.68628e-05	Unigene0052239;Unigene0040837;Unigene0030297;Unigene0030267;Unigene0040404;Unigene0042156;Unigene0044255;Unigene0004512;Unigene0047384;Unigene0029807;Unigene0030265;Unigene0045081;Unigene0006024;Unigene0007779;Unigene0035516
M1	Biological Process	GO:0006928	movement of cell or subcellular component	97	3.82978e-06	0.000146054	Unigene0046045;Unigene0037805;Unigene0038979;Unigene0012599;Unigene0035021;Unigene0036341;Unigene0050884;Unigene0052657;Unigene0052791;Unigene0006025;Unigene0049742;Unigene0004747;Unigene0042337;Unigene0029621;Unigene0025555;Unigene0048147;Unigene0051888;Unigene0024532;Unigene0042034;Unigene0033905;Unigene0005643;Unigene0038613;Unigene0025938;Unigene0034471;Unigene0031714;Unigene0053537;Unigene00…
M1	Biological Process	GO:0050905	neuromuscular process	17	5.91018e-06	0.00022133	Unigene0030267;Unigene0048008;Unigene0047114;Unigene0030297;Unigene0029807;Unigene0045652;Unigene0044642;Unigene0038300;Unigene0045081;Unigene0034797;Unigene0039296;Unigene0030674;Unigene0021641;Unigene0032813;Unigene0042156;Unigene0035193;Unigene0030265
M1	Biological Process	GO:0021955	central nervous system neuron axonogenesis	11	5.97952e-06	0.00022133	Unigene0043375;Unigene0045842;Unigene0043132;Unigene0047384;Unigene0015559;Unigene0050354;Unigene0043128;Unigene0007779;Unigene0020013;Unigene0031714;Unigene0028507
M1	Biological Process	GO:0031344	regulation of cell projection organization	36	6.54623e-06	0.000238795	Unigene0023349;Unigene0000280;Unigene0004728;Unigene0035971;Unigene0049549;Unigene0030267;Unigene0040479;Unigene0005524;Unigene0032955;Unigene0045597;Unigene0029184;Unigene0039317;Unigene0046834;Unigene0000239;Unigene0030265;Unigene0035516;Unigene0034569;Unigene0044642;Unigene0049742;Unigene0038613;Unigene0008647;Unigene0030297;Unigene0032441;Unigene0047209;Unigene0005586;Unigene0023577;Unigene00…
M1	Biological Process	GO:0060627	regulation of vesicle-mediated transport	27	6.90557e-06	0.000248305	Unigene0037536;Unigene0046749;Unigene0040479;Unigene0037805;Unigene0039317;Unigene0001804;Unigene0047373;Unigene0044311;Unigene0052593;Unigene0051477;Unigene0044139;Unigene0048631;Unigene0045581;Unigene0044633;Unigene0047372;Unigene0004831;Unigene0046113;Unigene0036941;Unigene0043386;Unigene0030852;Unigene0036842;Unigene0068258;Unigene0046825;Unigene0005277;Unigene0006058;Unigene0039797;Unigene00…
M1	Biological Process	GO:0034220	ion transmembrane transport	30	8.00098e-06	0.00028263	Unigene0001302;Unigene0031166;Unigene0027949;Unigene0035405;Unigene0041573;Unigene0007364;Unigene0042946;Unigene0048323;Unigene0052699;Unigene0033726;Unigene0047013;Unigene0052237;Unigene0039394;Unigene0051393;Unigene0036092;Unigene0046559;Unigene0051334;Unigene0039777;Unigene0028322;Unigene0032087;Unigene0050050;Unigene0052119;Unigene0033075;Unigene0005277;Unigene0021641;Unigene0037485;Unigene00…
M1	Biological Process	GO:0044763	single-organism cellular process	581	8.08477e-06	0.00028263	Unigene0007973;Unigene0040479;Unigene0053537;Unigene0032955;Unigene0034200;Unigene0029621;Unigene0006551;Unigene0041173;Unigene0047815;Unigene0045581;Unigene0045419;Unigene0038078;Unigene0050354;Unigene0044051;Unigene0005046;Unigene0039317;Unigene0003490;Unigene0017317;Unigene0004831;Unigene0009510;Unigene0041540;Unigene0045995;Unigene0009004;Unigene0000865;Unigene0015406;Unigene0051030;Unigene00…
M1	Biological Process	GO:0055085	transmembrane transport	31	9.16633e-06	0.00031605	Unigene0001302;Unigene0031166;Unigene0027949;Unigene0035405;Unigene0041573;Unigene0007364;Unigene0042946;Unigene0048323;Unigene0052699;Unigene0033726;Unigene0047013;Unigene0052237;Unigene0039394;Unigene0051393;Unigene0036092;Unigene0046559;Unigene0051334;Unigene0039777;Unigene0028322;Unigene0032087;Unigene0050050;Unigene0052119;Unigene0033075;Unigene0005277;Unigene0021641;Unigene0037485;Unigene00…
M1	Biological Process	GO:0033555	multicellular organismal response to stress	10	1.02644e-05	0.000349128	Unigene0030297;Unigene0030265;Unigene0030267;Unigene0042337;Unigene0049742;Unigene0036303;Unigene0043962;Unigene0024532;Unigene0035001;Unigene0000280
M1	Biological Process	GO:0007420	brain development	35	1.35004e-05	0.000447111	Unigene0025554;Unigene0040559;Unigene0035021;Unigene0036341;Unigene0022483;Unigene0011918;Unigene0012599;Unigene0037311;Unigene0025555;Unigene0004747;Unigene0030267;Unigene0069345;Unigene0029621;Unigene0030265;Unigene0053537;Unigene0030297;Unigene0039653;Unigene0039317;Unigene0052239;Unigene0026637;Unigene0049184;Unigene0049225;Unigene0035357;Unigene0029371;Unigene0030794;Unigene0008027;Unigene00…
M1	Biological Process	GO:0060322	head development	35	1.35004e-05	0.000447111	Unigene0025554;Unigene0040559;Unigene0035021;Unigene0036341;Unigene0022483;Unigene0011918;Unigene0012599;Unigene0037311;Unigene0025555;Unigene0042782;Unigene0008027;Unigene0049184;Unigene0030852;Unigene0043375;Unigene0026637;Unigene0039317;Unigene0035357;Unigene0053537;Unigene0039653;Unigene0068258;Unigene0000280;Unigene0030265;Unigene0030794;Unigene0000379;Unigene0030267;Unigene0029371;Unigene00…
M1	Biological Process	GO:0050808	synapse organization	13	1.49504e-05	0.000488703	Unigene0030265;Unigene0030297;Unigene0022598;Unigene0030267;Unigene0035516;Unigene0052119;Unigene0036738;Unigene0000280;Unigene0040404;Unigene0012646;Unigene0047815;Unigene0049397;Unigene0045081
M1	Biological Process	GO:1902578	single-organism localization	176	1.68367e-05	0.000543307	Unigene0030980;Unigene0047815;Unigene0036303;Unigene0019228;Unigene0043256;Unigene0024040;Unigene0049654;Unigene0029536;Unigene0045034;Unigene0005066;Unigene0034535;Unigene0040652;Unigene0005291;Unigene0046609;Unigene0005239;Unigene0044148;Unigene0044147;Unigene0033125;Unigene0046038;Unigene0037590;Unigene0035775;Unigene0006024;Unigene0030363;Unigene0049261;Unigene0039777;Unigene0043386;Unigene00…
M1	Biological Process	GO:0097485	neuron projection guidance	35	1.80751e-05	0.000575885	Unigene0025555;Unigene0033905;Unigene0005643;Unigene0038613;Unigene0025938;Unigene0046045;Unigene0034471;Unigene0031714;Unigene0053537;Unigene0043375;Unigene0052624;Unigene0039317;Unigene0041412;Unigene0043128;Unigene0002437;Unigene0042489;Unigene0027316;Unigene0030288;Unigene0052237;Unigene0004916;Unigene0029825;Unigene0040531;Unigene0033196;Unigene0012776;Unigene0044255;Unigene0051030;Unigene00…
M1	Biological Process	GO:0051952	regulation of amine transport	10	2.13253e-05	0.000670949	Unigene0045857;Unigene0037263;Unigene0037266;Unigene0036303;Unigene0037340;Unigene0047384;Unigene0042034;Unigene0006096;Unigene0007779;Unigene0004831
M1	Biological Process	GO:0017158	regulation of calcium ion-dependent exocytosis	7	2.23713e-05	0.000678418	Unigene0001804;Unigene0030852;Unigene0068258;Unigene0045581;Unigene0039317;Unigene0046825;Unigene0044311
M1	Biological Process	GO:0045838	positive regulation of membrane potential	7	2.23713e-05	0.000678418	Unigene0030297;Unigene0035516;Unigene0000280;Unigene0030267;Unigene0045081;Unigene0030265;Unigene0042156
M1	Biological Process	GO:1903305	regulation of regulated secretory pathway	7	2.23713e-05	0.000678418	Unigene0001804;Unigene0030852;Unigene0068258;Unigene0045581;Unigene0039317;Unigene0046825;Unigene0044311
M1	Biological Process	GO:0098742	cell-cell adhesion via plasma-membrane adhesion molecules	24	3.43189e-05	0.00102834	Unigene0036062;Unigene0008241;Unigene0049742;Unigene0052791;Unigene0036981;Unigene0051926;Unigene0005549;Unigene0039330;Unigene0036795;Unigene0006602;Unigene0046869;Unigene0027652;Unigene0047893;Unigene0048749;Unigene0037311;Unigene0042969;Unigene0018329;Unigene0009034;Unigene0052466;Unigene0043517;Unigene0051862;Unigene0051030;Unigene0033898;Unigene0036341
M1	Biological Process	GO:0030900	forebrain development	24	3.88728e-05	0.00115094	Unigene0004747;Unigene0030267;Unigene0022483;Unigene0069345;Unigene0029621;Unigene0030265;Unigene0053537;Unigene0030297;Unigene0000280;Unigene0036341;Unigene0039317;Unigene0068258;Unigene0039653;Unigene0025554;Unigene0041412;Unigene0026637;Unigene0030852;Unigene0049184;Unigene0042782;Unigene0052239;Unigene0000379;Unigene0029371;Unigene0008027;Unigene0043375
M1	Biological Process	GO:0042551	neuron maturation	7	3.9325e-05	0.00115094	Unigene0033196;Unigene0020013;Unigene0052239;Unigene0043132;Unigene0039394;Unigene0043128;Unigene0029680
M1	Biological Process	GO:0008038	neuron recognition	8	4.22642e-05	0.00122275	Unigene0043375;Unigene0021374;Unigene0037587;Unigene0039330;Unigene0005046;Unigene0002437;Unigene0008027;Unigene0027316
M1	Biological Process	GO:0006814	sodium ion transport	16	4.40312e-05	0.00125939	Unigene0051334;Unigene0030980;Unigene0027949;Unigene0051337;Unigene0042438;Unigene0006920;Unigene0031166;Unigene0028102;Unigene0035775;Unigene0021641;Unigene0022976;Unigene0017987;Unigene0006716;Unigene0043128;Unigene0051497;Unigene0005616
M1	Biological Process	GO:0010469	regulation of receptor activity	15	4.75539e-05	0.0013399	Unigene0036092;Unigene0006052;Unigene0033075;Unigene0000280;Unigene0042156;Unigene0052119;Unigene0051653;Unigene0049477;Unigene0033726;Unigene0035516;Unigene0039317;Unigene0052657;Unigene0000681;Unigene0030040;Unigene0006625
M1	Biological Process	GO:0007638	mechanosensory behavior	6	4.79106e-05	0.0013399	Unigene0030297;Unigene0045652;Unigene0040404;Unigene0045081;Unigene0030267;Unigene0030265
M1	Biological Process	GO:0040011	locomotion	85	5.38223e-05	0.00148869	Unigene0046045;Unigene0012599;Unigene0035021;Unigene0036341;Unigene0052791;Unigene0006025;Unigene0049742;Unigene0004747;Unigene0042337;Unigene0029621;Unigene0025555;Unigene0048147;Unigene0051888;Unigene0024532;Unigene0042034;Unigene0033905;Unigene0005643;Unigene0038613;Unigene0025938;Unigene0034471;Unigene0031714;Unigene0053537;Unigene0043375;Unigene0052624;Unigene0039317;Unigene0031580;Unigene00…
M1	Biological Process	GO:0043113	receptor clustering	8	6.39554e-05	0.00174974	Unigene0030265;Unigene0030297;Unigene0022598;Unigene0030267;Unigene0037423;Unigene0000280;Unigene0040404;Unigene0045081
M1	Biological Process	GO:0000904	cell morphogenesis involved in differentiation	29	7.66913e-05	0.00207561	Unigene0043408;Unigene0043375;Unigene0045842;Unigene0043132;Unigene0047384;Unigene0015559;Unigene0050354;Unigene0043128;Unigene0007779;Unigene0020013;Unigene0031714;Unigene0028507;Unigene0025555;Unigene0033905;Unigene0005643;Unigene0038613;Unigene0025938;Unigene0046045;Unigene0034471;Unigene0053537;Unigene0052624;Unigene0039317;Unigene0032955;Unigene0041584;Unigene0002323;Unigene0030674;Unigene00…
M1	Biological Process	GO:0001764	neuron migration	11	8.92299e-05	0.00233396	Unigene0025555;Unigene0036341;Unigene0031580;Unigene0034659;Unigene0034661;Unigene0038062;Unigene0035225;Unigene0029621;Unigene0008592;Unigene0054575;Unigene0043356
M1	Biological Process	GO:0032879	regulation of localization	113	8.98655e-05	0.00233396	Unigene0037536;Unigene0046749;Unigene0040479;Unigene0051016;Unigene0052657;Unigene0005460;Unigene0051337;Unigene0042337;Unigene0046832;Unigene0031208;Unigene0001014;Unigene0022598;Unigene0045169;Unigene0046045;Unigene0004831;Unigene0035552;Unigene0035551;Unigene0008647;Unigene0048373;Unigene0006971;Unigene0051041;Unigene0039317;Unigene0042585;Unigene0033555;Unigene0042117;Unigene0029621;Unigene00…
M1	Biological Process	GO:0032225	regulation of synaptic transmission, dopaminergic	6	8.9946e-05	0.00233396	Unigene0006024;Unigene0004831;Unigene0007779;Unigene0043164;Unigene0044139;Unigene0047384
M1	Biological Process	GO:0050951	sensory perception of temperature stimulus	6	8.9946e-05	0.00233396	Unigene0043962;Unigene0000007;Unigene0032955;Unigene0024532;Unigene0031714;Unigene0032021
M1	Biological Process	GO:0010996	response to auditory stimulus	5	9.19449e-05	0.00233763	Unigene0040404;Unigene0030265;Unigene0030267;Unigene0030297;Unigene0045081
M1	Biological Process	GO:0031223	auditory behavior	5	9.19449e-05	0.00233763	Unigene0030265;Unigene0045081;Unigene0040404;Unigene0030297;Unigene0030267
M1	Biological Process	GO:0065008	regulation of biological quality	174	9.92625e-05	0.00249844	Unigene0045581;Unigene0050078;Unigene0027753;Unigene0051016;Unigene0052657;Unigene0005460;Unigene0051337;Unigene0009510;Unigene0041540;Unigene0004831;Unigene0035552;Unigene0035551;Unigene0022598;Unigene0050599;Unigene0030674;Unigene0034797;Unigene0036303;Unigene0042585;Unigene0033555;Unigene0042117;Unigene0029621;Unigene0045857;Unigene0041412;Unigene0032660;Unigene0045081;Unigene0030265;Unigene00…
M1	Biological Process	GO:0044699	single-organism process	681	0.000109482	0.00272837	Unigene0030980;Unigene0051733;Unigene0007973;Unigene0040479;Unigene0053537;Unigene0032955;Unigene0034200;Unigene0029621;Unigene0006551;Unigene0041173;Unigene0047815;Unigene0045581;Unigene0036303;Unigene0046038;Unigene0047384;Unigene0043375;Unigene0045652;Unigene0031714;Unigene0007779;Unigene0045419;Unigene0019228;Unigene0043256;Unigene0024040;Unigene0049654;Unigene0029536;Unigene0045034;Unigene00…
M1	Biological Process	GO:0045664	regulation of neuron differentiation	26	0.000122632	0.00302613	Unigene0023349;Unigene0000280;Unigene0004728;Unigene0035971;Unigene0049549;Unigene0030267;Unigene0040479;Unigene0005524;Unigene0032955;Unigene0045597;Unigene0029184;Unigene0039317;Unigene0046834;Unigene0000239;Unigene0030265;Unigene0035516;Unigene0034569;Unigene0044642;Unigene0049742;Unigene0038613;Unigene0008647;Unigene0030297;Unigene0032441;Unigene0047209;Unigene0042337;Unigene0022483
M1	Biological Process	GO:0006820	anion transport	41	0.000124582	0.00304439	Unigene0030980;Unigene0019228;Unigene0043256;Unigene0024040;Unigene0049654;Unigene0029536;Unigene0045034;Unigene0005066;Unigene0034535;Unigene0040652;Unigene0005291;Unigene0046609;Unigene0005239;Unigene0044148;Unigene0044147;Unigene0033125;Unigene0001302;Unigene0031166;Unigene0022598;Unigene0049510;Unigene0045652;Unigene0032206;Unigene0037103;Unigene0007228;Unigene0013997;Unigene0045581;Unigene00…
M1	Biological Process	GO:0007186	G-protein coupled receptor signaling pathway	34	0.000145247	0.00351526	Unigene0045857;Unigene0045169;Unigene0031642;Unigene0052470;Unigene0030145;Unigene0037587;Unigene0029098;Unigene0033840;Unigene0024532;Unigene0036303;Unigene0006096;Unigene0039106;Unigene0042337;Unigene0036842;Unigene0029536;Unigene0022780;Unigene0005291;Unigene0004397;Unigene0049481;Unigene0040829;Unigene0049654;Unigene0025785;Unigene0024040;Unigene0041492;Unigene0033125;Unigene0045558;Unigene00…
M1	Biological Process	GO:0007154	cell communication	218	0.000164011	0.00393158	Unigene0040479;Unigene0045859;Unigene0044882;Unigene0041375;Unigene0037266;Unigene0040837;Unigene0037263;Unigene0041430;Unigene0051334;Unigene0036303;Unigene0028102;Unigene0001014;Unigene0045857;Unigene0045169;Unigene0031642;Unigene0052470;Unigene0030145;Unigene0037587;Unigene0029098;Unigene0033840;Unigene0024532;Unigene0006096;Unigene0039106;Unigene0047815;Unigene0045718;Unigene0006625;Unigene00…
M1	Biological Process	GO:0030902	hindbrain development	9	0.000188488	0.0044757	Unigene0025554;Unigene0040559;Unigene0035021;Unigene0036341;Unigene0022483;Unigene0011918;Unigene0012599;Unigene0037311;Unigene0025555
M1	Biological Process	GO:0045161	neuronal ion channel clustering	5	0.000194515	0.00457565	Unigene0020013;Unigene0043128;Unigene0043132;Unigene0039394;Unigene0052239
M1	Biological Process	GO:0007632	visual behavior	10	0.000217826	0.00507655	Unigene0051337;Unigene0051334;Unigene0036303;Unigene0047384;Unigene0002345;Unigene0039317;Unigene0040837;Unigene0051888;Unigene0035516;Unigene0007779
M1	Biological Process	GO:0021954	central nervous system neuron development	11	0.000226546	0.00523134	Unigene0047384;Unigene0031714;Unigene0043375;Unigene0043132;Unigene0020013;Unigene0045842;Unigene0015559;Unigene0043128;Unigene0007779;Unigene0028507;Unigene0050354
M1	Biological Process	GO:0010975	regulation of neuron projection development	24	0.00023478	0.0053722	Unigene0023349;Unigene0000280;Unigene0004728;Unigene0035971;Unigene0049549;Unigene0030267;Unigene0040479;Unigene0005524;Unigene0032955;Unigene0045597;Unigene0029184;Unigene0039317;Unigene0046834;Unigene0000239;Unigene0030265;Unigene0035516;Unigene0034569;Unigene0044642;Unigene0049742;Unigene0038613;Unigene0008647;Unigene0030297;Unigene0032441;Unigene0047209
M1	Biological Process	GO:0050773	regulation of dendrite development	7	0.000238051	0.00539798	Unigene0044642;Unigene0030265;Unigene0030267;Unigene0046834;Unigene0039317;Unigene0035516;Unigene0030297
M1	Biological Process	GO:0021533	cell differentiation in hindbrain	6	0.000257648	0.00573894	Unigene0012599;Unigene0025554;Unigene0011918;Unigene0040559;Unigene0025555;Unigene0037311
M1	Biological Process	GO:0048814	regulation of dendrite morphogenesis	6	0.000257648	0.00573894	Unigene0035516;Unigene0046834;Unigene0030297;Unigene0030265;Unigene0039317;Unigene0030267
M1	Biological Process	GO:0045595	regulation of cell differentiation	92	0.000296993	0.00655729	Unigene0046045;Unigene0031024;Unigene0053818;Unigene0039690;Unigene0042891;Unigene0039689;Unigene0019322;Unigene0020272;Unigene0039106;Unigene0032813;Unigene0052340;Unigene0028102;Unigene0043375;Unigene0036341;Unigene0029548;Unigene0040560;Unigene0036858;Unigene0031208;Unigene0029621;Unigene0005643;Unigene0043947;Unigene0023349;Unigene0000280;Unigene0004728;Unigene0035971;Unigene0049549;Unigene00…
M1	Biological Process	GO:0023052	signaling	213	0.000323444	0.00691102	Unigene0040479;Unigene0045859;Unigene0044882;Unigene0041375;Unigene0037266;Unigene0040837;Unigene0037263;Unigene0041430;Unigene0051334;Unigene0036303;Unigene0028102;Unigene0001014;Unigene0045857;Unigene0045169;Unigene0031642;Unigene0052470;Unigene0030145;Unigene0037587;Unigene0029098;Unigene0033840;Unigene0024532;Unigene0006096;Unigene0039106;Unigene0047815;Unigene0045718;Unigene0006625;Unigene00…
M1	Biological Process	GO:0044700	single organism signaling	213	0.000323444	0.00691102	Unigene0040479;Unigene0045859;Unigene0044882;Unigene0041375;Unigene0037266;Unigene0040837;Unigene0037263;Unigene0041430;Unigene0051334;Unigene0036303;Unigene0028102;Unigene0001014;Unigene0045857;Unigene0045169;Unigene0031642;Unigene0052470;Unigene0030145;Unigene0037587;Unigene0029098;Unigene0033840;Unigene0024532;Unigene0006096;Unigene0039106;Unigene0047815;Unigene0045718;Unigene0006625;Unigene00…
M1	Biological Process	GO:0009582	detection of abiotic stimulus	9	0.000323997	0.00691102	Unigene0043962;Unigene0032955;Unigene0024532;Unigene0000007;Unigene0031714;Unigene0032021;Unigene0038017;Unigene0025069;Unigene0052593
M1	Biological Process	GO:0017157	regulation of exocytosis	9	0.000323997	0.00691102	Unigene0001804;Unigene0030852;Unigene0068258;Unigene0045581;Unigene0039317;Unigene0046825;Unigene0044311;Unigene0006058;Unigene0005277
M1	Biological Process	GO:0006935	chemotaxis	42	0.000334866	0.00702382	Unigene0048147;Unigene0051888;Unigene0042337;Unigene0024532;Unigene0042034;Unigene0025555;Unigene0033905;Unigene0005643;Unigene0038613;Unigene0025938;Unigene0046045;Unigene0034471;Unigene0031714;Unigene0053537;Unigene0043375;Unigene0052624;Unigene0039317;Unigene0040889;Unigene0033196;Unigene0029825;Unigene0027316;Unigene0008584;Unigene0040210;Unigene0002437;Unigene0000280;Unigene0043356;Unigene00…
M1	Biological Process	GO:0042330	taxis	42	0.000334866	0.00702382	Unigene0048147;Unigene0051888;Unigene0042337;Unigene0024532;Unigene0042034;Unigene0025555;Unigene0033905;Unigene0005643;Unigene0038613;Unigene0025938;Unigene0046045;Unigene0034471;Unigene0031714;Unigene0053537;Unigene0043375;Unigene0052624;Unigene0039317;Unigene0040889;Unigene0033196;Unigene0029825;Unigene0027316;Unigene0008584;Unigene0040210;Unigene0002437;Unigene0000280;Unigene0043356;Unigene00…
M1	Biological Process	GO:0006687	glycosphingolipid metabolic process	7	0.000343475	0.00714485	Unigene0028746;Unigene0030674;Unigene0034797;Unigene0006070;Unigene0031975;Unigene0033846;Unigene0040636
M1	Biological Process	GO:0032412	regulation of ion transmembrane transporter activity	18	0.000349281	0.00720606	Unigene0051016;Unigene0030265;Unigene0017987;Unigene0000280;Unigene0030267;Unigene0035516;Unigene0030297;Unigene0052657;Unigene0051337;Unigene0036303;Unigene0043489;Unigene0006971;Unigene0048008;Unigene0040076;Unigene0038613;Unigene0028102;Unigene0050884;Unigene0022976
M1	Biological Process	GO:0034776	response to histamine	4	0.000364857	0.00736632	Unigene0024040;Unigene0005066;Unigene0040652;Unigene0046609
M1	Biological Process	GO:0016048	detection of temperature stimulus	5	0.000365828	0.00736632	Unigene0024532;Unigene0032955;Unigene0000007;Unigene0031714;Unigene0032021
M1	Biological Process	GO:0050961	detection of temperature stimulus involved in sensory perception	5	0.000365828	0.00736632	Unigene0031714;Unigene0032021;Unigene0032955;Unigene0000007;Unigene0024532
M1	Biological Process	GO:0001941	postsynaptic membrane organization	3	0.000379204	0.00757504	Unigene0040404;Unigene0035516;Unigene0045081
M1	Biological Process	GO:0022898	regulation of transmembrane transporter activity	18	0.000395205	0.00783253	Unigene0051016;Unigene0030265;Unigene0017987;Unigene0000280;Unigene0030267;Unigene0035516;Unigene0030297;Unigene0052657;Unigene0051337;Unigene0036303;Unigene0043489;Unigene0006971;Unigene0048008;Unigene0022976;Unigene0050884;Unigene0028102;Unigene0038613;Unigene0040076
M1	Biological Process	GO:0022610	biological adhesion	65	0.000419347	0.00821745	Unigene0036062;Unigene0008241;Unigene0049742;Unigene0052791;Unigene0036981;Unigene0051926;Unigene0005549;Unigene0039330;Unigene0036795;Unigene0006602;Unigene0046869;Unigene0027652;Unigene0047893;Unigene0048749;Unigene0037311;Unigene0042969;Unigene0018329;Unigene0009034;Unigene0052466;Unigene0043517;Unigene0051862;Unigene0051030;Unigene0033898;Unigene0036341;Unigene0005511;Unigene0053537;Unigene00…
M1	Biological Process	GO:0014013	regulation of gliogenesis	11	0.000421157	0.00821745	Unigene0036341;Unigene0032581;Unigene0043947;Unigene0005643;Unigene0031969;Unigene0039106;Unigene0031208;Unigene0005524;Unigene0040413;Unigene0009080;Unigene0032813
M1	Biological Process	GO:0044765	single-organism transport	158	0.000473172	0.00916134	Unigene0030980;Unigene0047815;Unigene0036303;Unigene0019228;Unigene0043256;Unigene0024040;Unigene0049654;Unigene0029536;Unigene0045034;Unigene0005066;Unigene0034535;Unigene0040652;Unigene0005291;Unigene0046609;Unigene0005239;Unigene0044148;Unigene0044147;Unigene0033125;Unigene0046038;Unigene0037590;Unigene0035775;Unigene0006024;Unigene0030363;Unigene0049261;Unigene0039777;Unigene0043386;Unigene00…

## Sheet: Table S6
Table S6 Complete results of the Kyoto Encyclopedia of Genes and Genomes (KEGG) enrichment analysis for gene sets in modules defined by WGCNA.
ModuleID	KEGG_A_class	KEGG_B_class	Pathway	Specific gene (425)	Full gene (7122)	Pvalue	Qvalue	Pathway ID	Genes	K_IDs
M5	Cellular Processes	Cellular commiunity	Tight junction	9	177	1.5593e-07	9.04396e-06	ko04530	Unigene0000308;Unigene0001872;Unigene0032753;Unigene0037708;Unigene0042554;Unigene0052871;Unigene0052872;Unigene0052873;Unigene0060931	K05699+K10352+K18052+K10352+K10352+K10352+K10352+K10352+K12758
M5	Environmental Information Processing	Signal transduction	Calcium signaling pathway	8	260	3.52278e-05	0.00080208	ko04020	Unigene0006043;Unigene0007663;Unigene0034474;Unigene0049707;Unigene0051964;Unigene0052165;Unigene0052166;Unigene0065816	K00907+K05217+K05853+K04961+K00907+K04857+K04857+K12042
M5	Cellular Processes	Cellular commiunity	Focal adhesion	8	266	4.14869e-05	0.00080208	ko04510	Unigene0000308;Unigene0006043;Unigene0006347;Unigene0051087;Unigene0051088;Unigene0051089;Unigene0051964;Unigene0060931	K05699+K00907+K12959+K04437+K04437+K04437+K00907+K12758
M5	Organismal Systems	Circulatory system	Vascular smooth muscle contraction	5	137	0.000571301	0.00828386	ko04270	Unigene0006043;Unigene0032753;Unigene0051964;Unigene0052165;Unigene0052166	K00907+K18052+K00907+K04857+K04857
M1	Organismal Systems	Nervous system	Glutamatergic synapse	45	138	5.43523e-21	1.01095e-18	ko04724	Unigene0000215;Unigene0000233;Unigene0004512;Unigene0005460;Unigene0006096;Unigene0013997;Unigene0021280;Unigene0023022;Unigene0029807;Unigene0030145;Unigene0030265;Unigene0030267;Unigene0030297;Unigene0030654;Unigene0030980;Unigene0031464;Unigene0032206;Unigene0032624;Unigene0032781;Unigene0033840;Unigene0034484;Unigene0035001;Unigene0037263;Unigene0037266;Unigene0037267;Unigene0038134;Unigene00…	K04344+K05209+K15009+K04958+K04608+K05617+K05205+K04608+K11828+K04605+K15009+K15009+K15009+K04605+K12302+K04607+K12302+K13576+K04997+K08048+K15009+K19663+K05201+K05201+K05202+K15008+K04534+K05197+K05211+K05208+K05198+K05198+K05200+K05204+K15009+K05614+K04603+K05205+K04541+K19662+K05613+K04540+K08041+K04547+K05208
M1	Organismal Systems	Nervous system	Retrograde endocannabinoid signaling	37	119	1.1641e-16	1.08261e-14	ko04723	Unigene0000215;Unigene0002158;Unigene0002540;Unigene0005066;Unigene0005291;Unigene0005460;Unigene0024040;Unigene0029536;Unigene0030321;Unigene0030980;Unigene0031166;Unigene0031167;Unigene0032206;Unigene0032781;Unigene0033125;Unigene0033840;Unigene0035001;Unigene0035405;Unigene0037587;Unigene0038224;Unigene0038596;Unigene0039123;Unigene0040652;Unigene0040829;Unigene0041202;Unigene0041265;Unigene00…	K04344+K05184+K15291+K05186+K05175+K04958+K05175+K05175+K04441+K12302+K15015+K15015+K12302+K04997+K05175+K08048+K19663+K05002+K04277+K04534+K05000+K05197+K05181+K13806+K04440+K15291+K05198+K05198+K05200+K05181+K04603+K04541+K19662+K05175+K04540+K08041+K04547
M1	Organismal Systems	Nervous system	GABAergic synapse	29	97	8.06035e-13	4.99742e-11	ko04727	Unigene0000215;Unigene0002158;Unigene0005066;Unigene0005291;Unigene0007112;Unigene0022533;Unigene0024040;Unigene0029536;Unigene0031166;Unigene0031167;Unigene0032624;Unigene0033125;Unigene0033840;Unigene0035001;Unigene0038224;Unigene0038596;Unigene0038930;Unigene0040652;Unigene0041492;Unigene0045857;Unigene0046609;Unigene0048628;Unigene0049481;Unigene0049494;Unigene0049654;Unigene0050183;Unigene00…	K04344+K05184+K05186+K05175+K01580+K13524+K05175+K05175+K15015+K15015+K13576+K05175+K08048+K19663+K04534+K05000+K01580+K05181+K04615+K04615+K05181+K06027+K04541+K19662+K05175+K05034+K04540+K08041+K04547
M1	Environmental Information Processing	Signaling molecules and interaction	Neuroactive ligand-receptor interaction	55	307	1.21964e-12	5.67134e-11	ko04080	Unigene0000233;Unigene0002158;Unigene0004132;Unigene0005066;Unigene0005153;Unigene0005291;Unigene0005554;Unigene0006096;Unigene0007779;Unigene0019228;Unigene0021280;Unigene0023022;Unigene0023537;Unigene0024040;Unigene0028615;Unigene0029536;Unigene0030145;Unigene0030654;Unigene0031464;Unigene0031642;Unigene0033047;Unigene0033125;Unigene0036303;Unigene0037263;Unigene0037266;Unigene0037267;Unigene00…	K05209+K05184+K05240+K05186+K05220+K05175+K05207+K04608+K04813+K05194+K05205+K04608+K04228+K05175+K04195+K05175+K04605+K04605+K04607+K04320+K04216+K05175+K04578+K05201+K05201+K05202+K04809+K04277+K05197+K05062+K04805+K05211+K05181+K05208+K05206+K05198+K05198+K05200+K04615+K05204+K05207+K04198+K04261+K04210+K04615+K05215+K04587+K05181+K04603+K04813+K05205+K05175+K04149+K05233+K05208
M1	Organismal Systems	Nervous system	Synaptic vesicle cycle	22	85	1.00297e-08	3.73106e-07	ko04721	Unigene0000215;Unigene0000701;Unigene0002540;Unigene0002819;Unigene0023917;Unigene0028322;Unigene0030804;Unigene0030980;Unigene0031166;Unigene0031167;Unigene0032087;Unigene0032206;Unigene0039928;Unigene0041265;Unigene0043924;Unigene0045581;Unigene0045680;Unigene0046846;Unigene0047815;Unigene0048628;Unigene0050050;Unigene0060262	K04344+K15294+K15291+K01528+K02152+K02150+K07882+K12302+K15015+K15015+K02153+K12302+K15290+K15291+K13504+K15292+K01528+K15293+K15293+K06027+K02154+K08486
M1	Organismal Systems	Nervous system	Dopaminergic synapse	28	150	2.20023e-07	6.82072e-06	ko04728	Unigene0000215;Unigene0000233;Unigene0005460;Unigene0021641;Unigene0030307;Unigene0030321;Unigene0032781;Unigene0035001;Unigene0035405;Unigene0036842;Unigene0037482;Unigene0038224;Unigene0038596;Unigene0039123;Unigene0040053;Unigene0040298;Unigene0041202;Unigene0041429;Unigene0041430;Unigene0041435;Unigene0043489;Unigene0044642;Unigene0046072;Unigene0049481;Unigene0049494;Unigene0050822;Unigene00…	K04344+K05209+K04958+K04833+K01593+K04441+K04997+K19663+K05002+K15493+K11584+K04534+K05000+K05197+K10396+K10396+K04440+K05198+K05198+K05200+K04515+K04515+K04354+K04541+K19662+K04540+K04833+K04547
M1	Organismal Systems	Environmental adaptation	Circadian entrainment	25	132	7.4738e-07	1.9859e-05	ko04713	Unigene0000233;Unigene0005460;Unigene0032781;Unigene0033840;Unigene0035001;Unigene0035405;Unigene0038224;Unigene0038596;Unigene0039123;Unigene0040610;Unigene0040837;Unigene0041429;Unigene0041430;Unigene0041435;Unigene0043489;Unigene0044642;Unigene0046216;Unigene0049481;Unigene0049494;Unigene0050811;Unigene0050822;Unigene0052470;Unigene0052657;Unigene0057494;Unigene0060746	K05209+K04958+K04997+K08048+K19663+K05002+K04534+K05000+K05197+K05211+K05208+K05198+K05198+K05200+K04515+K04515+K04587+K04541+K19662+K04854+K04540+K08041+K04962+K04547+K05208
M1	Organismal Systems	Nervous system	Long-term potentiation	16	68	4.17774e-06	9.71325e-05	ko04720	Unigene0000233;Unigene0005460;Unigene0033840;Unigene0035001;Unigene0039123;Unigene0040610;Unigene0040837;Unigene0041429;Unigene0041430;Unigene0043489;Unigene0044642;Unigene0046654;Unigene0049494;Unigene0051878;Unigene0052470;Unigene0060746	K05209+K04958+K08048+K19663+K05197+K05211+K05208+K05198+K05198+K04515+K04515+K04603+K19662+K05869+K08041+K05208
M1	Organismal Systems	Nervous system	Cholinergic synapse	23	131	7.94885e-06	0.000164276	ko04725	Unigene0000215;Unigene0005460;Unigene0007364;Unigene0007779;Unigene0032781;Unigene0033840;Unigene0035001;Unigene0037340;Unigene0038224;Unigene0038596;Unigene0039266;Unigene0040841;Unigene0041169;Unigene0043489;Unigene0044642;Unigene0047384;Unigene0049481;Unigene0049494;Unigene0050822;Unigene0051878;Unigene0052237;Unigene0052470;Unigene0057494	K04344+K04958+K05005+K04813+K04997+K08048+K19663+K04809+K04534+K05000+K04805+K02649+K01049+K04515+K04515+K04813+K04541+K19662+K04540+K05869+K04927+K08041+K04547
M1	Organismal Systems	Endocrine system	Insulin secretion	18	97	3.58955e-05	0.000667657	ko04911	Unigene0018592;Unigene0030804;Unigene0033840;Unigene0035001;Unigene0036941;Unigene0043386;Unigene0043489;Unigene0043924;Unigene0044642;Unigene0046216;Unigene0047742;Unigene0048731;Unigene0049149;Unigene0049494;Unigene0051334;Unigene0051337;Unigene0052470;Unigene0052657	K04943+K07882+K08048+K19663+K04351+K15297+K04515+K13504+K04515+K04587+K04936+K16882+K16882+K19662+K01539+K01539+K08041+K04962
M1	Organismal Systems	Digestive system	Gastric acid secretion	14	75	0.000246033	0.00395896	ko04971	Unigene0005460;Unigene0027949;Unigene0028615;Unigene0028665;Unigene0033840;Unigene0035001;Unigene0039777;Unigene0041573;Unigene0043489;Unigene0044642;Unigene0049494;Unigene0051334;Unigene0051337;Unigene0052470	K04958+K01542+K04195+K04920+K08048+K19663+K05003+K05009+K04515+K04515+K19662+K01539+K01539+K08041
M1	Environmental Information Processing	Signal transduction	Calcium signaling pathway	32	260	0.000255417	0.00395896	ko04020	Unigene0000215;Unigene0000233;Unigene0004747;Unigene0005153;Unigene0005460;Unigene0006920;Unigene0023577;Unigene0028615;Unigene0032005;Unigene0032741;Unigene0033840;Unigene0035001;Unigene0035775;Unigene0036468;Unigene0037340;Unigene0040610;Unigene0040837;Unigene0042337;Unigene0043489;Unigene0044642;Unigene0046038;Unigene0046654;Unigene0049028;Unigene0049029;Unigene0049494;Unigene0050811;Unigene00…	K04344+K05209+K05085+K05220+K04958+K05849+K00911+K04195+K04852+K04852+K08048+K19663+K05849+K02183+K04809+K05211+K05208+K04198+K04515+K04515+K05215+K04603+K05850+K05850+K19662+K04854+K05859+K05869+K04149+K08041+K04962+K05208
M1	Organismal Systems	Sensory system	Inflammatory mediator regulation of TRP channels	17	110	0.000583979	0.0083554	ko04750	Unigene0005460;Unigene0006716;Unigene0017987;Unigene0030321;Unigene0032955;Unigene0033840;Unigene0035001;Unigene0040841;Unigene0041202;Unigene0043489;Unigene0043962;Unigene0044642;Unigene0045169;Unigene0049494;Unigene0051016;Unigene0051888;Unigene0052470	K04958+K04829+K04828+K04441+K03176+K08048+K19663+K02649+K04440+K04515+K04984+K04515+K04261+K19662+K05859+K04149+K08041
M1	Organismal Systems	Nervous system	Long-term depression	13	73	0.000653761	0.00868568	ko04730	Unigene0000215;Unigene0005460;Unigene0005554;Unigene0035001;Unigene0036303;Unigene0038224;Unigene0039123;Unigene0041429;Unigene0041430;Unigene0041753;Unigene0046642;Unigene0046654;Unigene0049494	K04344+K04958+K05207+K19663+K04578+K04534+K05197+K05198+K05198+K05207+K05087+K04603+K19662

## Sheet: Table S7
Table S7 Complete results of the GO enrichment analysis for the merged gene set in modules significant associated with RF.
ModuleID	Ontology	GO ID	Description	Number of Genes	pvalue	fdr	geneID
M1+M6	Cellular component	GO:0097458	neuron part	146	1.40394e-38	4.35222e-36	Unigene0000239;Unigene0000280;Unigene0000339;Unigene0000627;Unigene0000701;Unigene0001071;Unigene0001414;Unigene0002044;Unigene0002087;Unigene0002345;Unigene0002819;Unigene0004236;Unigene0004512;Unigene0004519;Unigene0004750;Unigene0004772;Unigene0004816;Unigene0004982;Unigene0005066;Unigene0005277;Unigene0005586;Unigene0005885;Unigene0005940;Unigene0006089;Unigene0006096;Unigene0006551;Unigene00…
M1+M6	Cellular component	GO:0043005	neuron projection	139	7.61864e-38	1.18089e-35	Unigene0000239;Unigene0000280;Unigene0000339;Unigene0000627;Unigene0000701;Unigene0001071;Unigene0001414;Unigene0002044;Unigene0002087;Unigene0002345;Unigene0002819;Unigene0004236;Unigene0004512;Unigene0004519;Unigene0004750;Unigene0004772;Unigene0004816;Unigene0004982;Unigene0005066;Unigene0005277;Unigene0005586;Unigene0005885;Unigene0005940;Unigene0006089;Unigene0006096;Unigene0006625;Unigene00…
M1+M6	Cellular component	GO:0045202	synapse	93	1.30446e-33	1.34795e-31	Unigene0000310;Unigene0000681;Unigene0002044;Unigene0002087;Unigene0002482;Unigene0003755;Unigene0003934;Unigene0004512;Unigene0004519;Unigene0005066;Unigene0005277;Unigene0005291;Unigene0005460;Unigene0005940;Unigene0006058;Unigene0006096;Unigene0006311;Unigene0006625;Unigene0006971;Unigene0007112;Unigene0007228;Unigene0007779;Unigene0008241;Unigene0009034;Unigene0012646;Unigene0014341;Unigene00…
M1+M6	Cellular component	GO:0044456	synapse part	84	2.20434e-32	1.70837e-30	Unigene0000310;Unigene0002044;Unigene0002087;Unigene0002482;Unigene0003755;Unigene0003934;Unigene0004512;Unigene0004519;Unigene0005066;Unigene0005277;Unigene0005291;Unigene0005460;Unigene0005940;Unigene0006058;Unigene0006096;Unigene0006311;Unigene0006625;Unigene0006971;Unigene0007112;Unigene0007228;Unigene0007779;Unigene0008241;Unigene0009034;Unigene0012646;Unigene0014341;Unigene0019228;Unigene00…
M1+M6	Cellular component	GO:0042995	cell projection	198	2.98992e-29	1.85375e-27	Unigene0000239;Unigene0000280;Unigene0000339;Unigene0000549;Unigene0000627;Unigene0000701;Unigene0001071;Unigene0001414;Unigene0001963;Unigene0002044;Unigene0002087;Unigene0002323;Unigene0002345;Unigene0002819;Unigene0003348;Unigene0003755;Unigene0003871;Unigene0004236;Unigene0004512;Unigene0004519;Unigene0004530;Unigene0004750;Unigene0004772;Unigene0004816;Unigene0004982;Unigene0005066;Unigene00…
M1+M6	Cellular component	GO:0044425	membrane part	462	2.02052e-25	1.04394e-23	Unigene0000007;Unigene0000100;Unigene0000310;Unigene0000526;Unigene0000554;Unigene0000681;Unigene0000701;Unigene0000941;Unigene0001071;Unigene0001302;Unigene0001804;Unigene0001997;Unigene0002044;Unigene0002087;Unigene0002158;Unigene0002482;Unigene0002803;Unigene0002905;Unigene0002956;Unigene0003168;Unigene0003261;Unigene0003335;Unigene0003401;Unigene0003411;Unigene0003755;Unigene0003756;Unigene00…
M1+M6	Cellular component	GO:0016020	membrane	585	2.98815e-22	1.32332e-20	Unigene0000007;Unigene0000100;Unigene0000239;Unigene0000252;Unigene0000310;Unigene0000389;Unigene0000507;Unigene0000526;Unigene0000554;Unigene0000627;Unigene0000681;Unigene0000701;Unigene0000941;Unigene0001071;Unigene0001302;Unigene0001670;Unigene0001708;Unigene0001804;Unigene0001997;Unigene0002044;Unigene0002087;Unigene0002158;Unigene0002323;Unigene0002345;Unigene0002482;Unigene0002641;Unigene00…
M1+M6	Cellular component	GO:0097060	synaptic membrane	56	6.38083e-21	2.47257e-19	Unigene0000310;Unigene0002044;Unigene0002482;Unigene0003755;Unigene0003934;Unigene0004512;Unigene0004519;Unigene0005066;Unigene0005277;Unigene0005291;Unigene0005940;Unigene0006058;Unigene0006096;Unigene0006311;Unigene0006625;Unigene0006971;Unigene0007112;Unigene0007779;Unigene0008241;Unigene0009034;Unigene0012646;Unigene0019228;Unigene0024040;Unigene0028145;Unigene0029807;Unigene0030145;Unigene00…
M1+M6	Cellular component	GO:0031224	intrinsic component of membrane	384	2.56216e-20	8.82522e-19	Unigene0000007;Unigene0000100;Unigene0000310;Unigene0000526;Unigene0000681;Unigene0000941;Unigene0001071;Unigene0001302;Unigene0001804;Unigene0001997;Unigene0002044;Unigene0002158;Unigene0002803;Unigene0002905;Unigene0002956;Unigene0003168;Unigene0003261;Unigene0003335;Unigene0003401;Unigene0003411;Unigene0003755;Unigene0003756;Unigene0003777;Unigene0003903;Unigene0003934;Unigene0004236;Unigene00…
M1+M6	Cellular component	GO:0098590	plasma membrane region	72	4.5807e-19	1.42002e-17	Unigene0000310;Unigene0002044;Unigene0002087;Unigene0002482;Unigene0003755;Unigene0003934;Unigene0004512;Unigene0004519;Unigene0005066;Unigene0005277;Unigene0005291;Unigene0005885;Unigene0005940;Unigene0006058;Unigene0006096;Unigene0006311;Unigene0006625;Unigene0006971;Unigene0007112;Unigene0007288;Unigene0007779;Unigene0008241;Unigene0008865;Unigene0009034;Unigene0012646;Unigene0019228;Unigene00…
M1+M6	Cellular component	GO:0098589	membrane region	87	1.35309e-18	3.81326e-17	Unigene0000310;Unigene0002044;Unigene0002087;Unigene0002482;Unigene0003755;Unigene0003934;Unigene0004512;Unigene0004519;Unigene0005066;Unigene0005277;Unigene0005291;Unigene0005479;Unigene0005885;Unigene0005940;Unigene0006024;Unigene0006058;Unigene0006096;Unigene0006311;Unigene0006625;Unigene0006971;Unigene0007112;Unigene0007288;Unigene0007779;Unigene0008241;Unigene0008865;Unigene0009034;Unigene00…
M1+M6	Cellular component	GO:0034702	ion channel complex	52	1.35605e-16	3.50312e-15	Unigene0000310;Unigene0002044;Unigene0004655;Unigene0004722;Unigene0005066;Unigene0005291;Unigene0005885;Unigene0006358;Unigene0006576;Unigene0006625;Unigene0007779;Unigene0013425;Unigene0019228;Unigene0021641;Unigene0021845;Unigene0024040;Unigene0027995;Unigene0029807;Unigene0031580;Unigene0033075;Unigene0033726;Unigene0034743;Unigene0036092;Unigene0036335;Unigene0037263;Unigene0037266;Unigene00…
M1+M6	Cellular component	GO:1902495	transmembrane transporter complex	52	3.15118e-16	6.9776e-15	Unigene0000310;Unigene0002044;Unigene0004655;Unigene0004722;Unigene0005066;Unigene0005291;Unigene0005885;Unigene0006358;Unigene0006576;Unigene0006625;Unigene0007779;Unigene0013425;Unigene0019228;Unigene0021641;Unigene0021845;Unigene0024040;Unigene0027995;Unigene0029807;Unigene0031580;Unigene0033075;Unigene0033726;Unigene0034743;Unigene0036092;Unigene0036335;Unigene0037263;Unigene0037266;Unigene00…
M1+M6	Cellular component	GO:1990351	transporter complex	52	3.15118e-16	6.9776e-15	Unigene0000310;Unigene0002044;Unigene0004655;Unigene0004722;Unigene0005066;Unigene0005291;Unigene0005885;Unigene0006358;Unigene0006576;Unigene0006625;Unigene0007779;Unigene0013425;Unigene0019228;Unigene0021641;Unigene0021845;Unigene0024040;Unigene0027995;Unigene0029807;Unigene0031580;Unigene0033075;Unigene0033726;Unigene0034743;Unigene0036092;Unigene0036335;Unigene0037263;Unigene0037266;Unigene00…
M1+M6	Cellular component	GO:0044459	plasma membrane part	121	1.31074e-15	2.70885e-14	Unigene0000310;Unigene0000526;Unigene0002044;Unigene0002087;Unigene0002482;Unigene0003755;Unigene0003934;Unigene0004236;Unigene0004512;Unigene0004519;Unigene0004655;Unigene0005066;Unigene0005277;Unigene0005291;Unigene0005511;Unigene0005824;Unigene0005885;Unigene0005940;Unigene0006058;Unigene0006096;Unigene0006121;Unigene0006311;Unigene0006358;Unigene0006551;Unigene0006576;Unigene0006625;Unigene00…
M1+M6	Cellular component	GO:0044297	cell body	54	1.90818e-14	3.69711e-13	Unigene0000627;Unigene0000701;Unigene0002087;Unigene0004236;Unigene0004816;Unigene0005586;Unigene0005940;Unigene0006089;Unigene0006971;Unigene0013348;Unigene0020013;Unigene0021641;Unigene0022483;Unigene0024532;Unigene0028524;Unigene0032630;Unigene0032807;Unigene0033909;Unigene0034206;Unigene0034509;Unigene0035664;Unigene0035775;Unigene0035807;Unigene0035971;Unigene0036303;Unigene0037485;Unigene00…
M1+M6	Cellular component	GO:0008328	ionotropic glutamate receptor complex	20	4.83759e-12	8.57102e-11	Unigene0004655;Unigene0005885;Unigene0006576;Unigene0006625;Unigene0013425;Unigene0021845;Unigene0029807;Unigene0031580;Unigene0033075;Unigene0033726;Unigene0036092;Unigene0036335;Unigene0037263;Unigene0037266;Unigene0037677;Unigene0040837;Unigene0041430;Unigene0042156;Unigene0051653;Unigene0052119
M1+M6	Cellular component	GO:0031226	intrinsic component of plasma membrane	32	4.97672e-12	8.57102e-11	Unigene0000526;Unigene0004512;Unigene0004655;Unigene0005885;Unigene0006576;Unigene0006625;Unigene0013425;Unigene0021641;Unigene0021845;Unigene0029807;Unigene0030434;Unigene0031580;Unigene0032508;Unigene0033075;Unigene0033726;Unigene0036092;Unigene0036335;Unigene0036858;Unigene0037263;Unigene0037266;Unigene0037677;Unigene0038613;Unigene0040837;Unigene0041430;Unigene0041492;Unigene0042156;Unigene00…
M1+M6	Cellular component	GO:0005887	integral component of plasma membrane	30	7.76783e-12	1.26738e-10	Unigene0000526;Unigene0004512;Unigene0004655;Unigene0005885;Unigene0006576;Unigene0006625;Unigene0013425;Unigene0021641;Unigene0021845;Unigene0029807;Unigene0030434;Unigene0031580;Unigene0033075;Unigene0033726;Unigene0036092;Unigene0036335;Unigene0037263;Unigene0037266;Unigene0037677;Unigene0038613;Unigene0040837;Unigene0041430;Unigene0041492;Unigene0042156;Unigene0045857;Unigene0048147;Unigene00…
M1+M6	Cellular component	GO:0030424	axon	33	8.61741e-12	1.3357e-10	Unigene0000701;Unigene0002819;Unigene0004750;Unigene0004772;Unigene0013348;Unigene0020013;Unigene0021641;Unigene0022054;Unigene0024532;Unigene0029807;Unigene0030363;Unigene0030980;Unigene0031166;Unigene0031167;Unigene0037166;Unigene0038613;Unigene0039296;Unigene0039793;Unigene0039819;Unigene0040260;Unigene0040829;Unigene0042391;Unigene0042836;Unigene0043128;Unigene0043132;Unigene0043489;Unigene00…
M1+M6	Cellular component	GO:0098802	plasma membrane receptor complex	25	2.99506e-11	4.42128e-10	Unigene0000526;Unigene0004655;Unigene0005885;Unigene0006576;Unigene0006625;Unigene0013425;Unigene0021845;Unigene0029807;Unigene0030434;Unigene0031580;Unigene0033075;Unigene0033726;Unigene0036092;Unigene0036335;Unigene0037263;Unigene0037266;Unigene0037677;Unigene0040837;Unigene0041430;Unigene0041492;Unigene0042156;Unigene0045857;Unigene0048147;Unigene0051653;Unigene0052119
M1+M6	Cellular component	GO:0005886	plasma membrane	131	7.88004e-11	1.11037e-09	Unigene0000310;Unigene0000507;Unigene0000526;Unigene0002044;Unigene0002087;Unigene0002482;Unigene0003755;Unigene0003934;Unigene0004236;Unigene0004512;Unigene0004519;Unigene0004655;Unigene0004750;Unigene0005066;Unigene0005277;Unigene0005291;Unigene0005511;Unigene0005824;Unigene0005885;Unigene0005940;Unigene0006058;Unigene0006096;Unigene0006121;Unigene0006311;Unigene0006358;Unigene0006519;Unigene00…
M1+M6	Cellular component	GO:0098794	postsynapse	17	8.3108e-11	1.12015e-09	Unigene0002087;Unigene0030265;Unigene0030267;Unigene0030297;Unigene0035021;Unigene0037263;Unigene0037266;Unigene0038134;Unigene0038701;Unigene0039819;Unigene0040837;Unigene0041202;Unigene0042156;Unigene0044642;Unigene0044643;Unigene0050822;Unigene0051334
M1+M6	Cellular component	GO:0033267	axon part	29	8.72702e-11	1.12724e-09	Unigene0000701;Unigene0002819;Unigene0004750;Unigene0013348;Unigene0020013;Unigene0021641;Unigene0022054;Unigene0024532;Unigene0029807;Unigene0030363;Unigene0031166;Unigene0031167;Unigene0038613;Unigene0039296;Unigene0039793;Unigene0039819;Unigene0040260;Unigene0040829;Unigene0042836;Unigene0043128;Unigene0043132;Unigene0043489;Unigene0045581;Unigene0046869;Unigene0049549;Unigene0050820;Unigene00…
M1+M6	Cellular component	GO:0098796	membrane protein complex	76	1.50088e-10	1.86109e-09	Unigene0000310;Unigene0000526;Unigene0000701;Unigene0002044;Unigene0004655;Unigene0004722;Unigene0005066;Unigene0005291;Unigene0005824;Unigene0005885;Unigene0006254;Unigene0006358;Unigene0006576;Unigene0006606;Unigene0006625;Unigene0007779;Unigene0013425;Unigene0019228;Unigene0021641;Unigene0021845;Unigene0023917;Unigene0024040;Unigene0027351;Unigene0027995;Unigene0028322;Unigene0029807;Unigene00…
M1+M6	Cellular component	GO:0071944	cell periphery	132	2.44765e-10	2.91836e-09	Unigene0000310;Unigene0000507;Unigene0000526;Unigene0002044;Unigene0002087;Unigene0002482;Unigene0003755;Unigene0003934;Unigene0004236;Unigene0004512;Unigene0004519;Unigene0004655;Unigene0004750;Unigene0005066;Unigene0005277;Unigene0005291;Unigene0005511;Unigene0005824;Unigene0005885;Unigene0005940;Unigene0006058;Unigene0006096;Unigene0006121;Unigene0006311;Unigene0006358;Unigene0006519;Unigene00…
M1+M6	Cellular component	GO:0044463	cell projection part	66	4.07906e-10	4.68336e-09	Unigene0000701;Unigene0002087;Unigene0002819;Unigene0003755;Unigene0004530;Unigene0004750;Unigene0005066;Unigene0005559;Unigene0005586;Unigene0005885;Unigene0006200;Unigene0006358;Unigene0007288;Unigene0008865;Unigene0013348;Unigene0020013;Unigene0021641;Unigene0022054;Unigene0022960;Unigene0024532;Unigene0027316;Unigene0029807;Unigene0030363;Unigene0031166;Unigene0031167;Unigene0035784;Unigene00…
M1+M6	Cellular component	GO:0043235	receptor complex	31	6.6485e-10	7.36084e-09	Unigene0000526;Unigene0004655;Unigene0005066;Unigene0005885;Unigene0006576;Unigene0006625;Unigene0013425;Unigene0021845;Unigene0024040;Unigene0029807;Unigene0030434;Unigene0031474;Unigene0031580;Unigene0033075;Unigene0033726;Unigene0034373;Unigene0036092;Unigene0036335;Unigene0037263;Unigene0037266;Unigene0037677;Unigene0040652;Unigene0040837;Unigene0041430;Unigene0041492;Unigene0042156;Unigene00…
M1+M6	Cellular component	GO:0014069	postsynaptic density	15	8.6013e-10	8.6013e-09	Unigene0030265;Unigene0030267;Unigene0030297;Unigene0035021;Unigene0037263;Unigene0037266;Unigene0038134;Unigene0038701;Unigene0039819;Unigene0040837;Unigene0041202;Unigene0042156;Unigene0044642;Unigene0044643;Unigene0050822
M1+M6	Cellular component	GO:0060076	excitatory synapse	15	8.6013e-10	8.6013e-09	Unigene0030265;Unigene0030267;Unigene0030297;Unigene0035021;Unigene0037263;Unigene0037266;Unigene0038134;Unigene0038701;Unigene0039819;Unigene0040837;Unigene0041202;Unigene0042156;Unigene0044642;Unigene0044643;Unigene0050822
M1+M6	Cellular component	GO:0099572	postsynaptic specialization	15	8.6013e-10	8.6013e-09	Unigene0030265;Unigene0030267;Unigene0030297;Unigene0035021;Unigene0037263;Unigene0037266;Unigene0038134;Unigene0038701;Unigene0039819;Unigene0040837;Unigene0041202;Unigene0042156;Unigene0044642;Unigene0044643;Unigene0050822
M1+M6	Cellular component	GO:0016021	integral component of membrane	107	1.95941e-09	1.89818e-08	Unigene0000007;Unigene0000100;Unigene0000310;Unigene0000526;Unigene0001997;Unigene0002044;Unigene0002803;Unigene0002905;Unigene0003168;Unigene0003401;Unigene0003755;Unigene0003777;Unigene0004512;Unigene0004655;Unigene0004722;Unigene0005066;Unigene0005273;Unigene0005291;Unigene0005885;Unigene0006024;Unigene0006096;Unigene0006203;Unigene0006303;Unigene0006358;Unigene0006576;Unigene0006625;Unigene00…
M1+M6	Cellular component	GO:0098805	whole membrane	101	8.3278e-09	7.82308e-08	Unigene0000310;Unigene0002044;Unigene0002087;Unigene0002482;Unigene0003755;Unigene0003934;Unigene0004512;Unigene0004519;Unigene0005066;Unigene0005277;Unigene0005291;Unigene0005460;Unigene0005479;Unigene0005885;Unigene0005940;Unigene0006024;Unigene0006058;Unigene0006096;Unigene0006311;Unigene0006625;Unigene0006971;Unigene0007112;Unigene0007288;Unigene0007779;Unigene0008241;Unigene0008865;Unigene00…
M1+M6	Cellular component	GO:0098797	plasma membrane protein complex	28	1.61561e-08	1.47306e-07	Unigene0000526;Unigene0004655;Unigene0005824;Unigene0005885;Unigene0006358;Unigene0006576;Unigene0006625;Unigene0013425;Unigene0021845;Unigene0029807;Unigene0030434;Unigene0031580;Unigene0033075;Unigene0033726;Unigene0036092;Unigene0036335;Unigene0037263;Unigene0037266;Unigene0037677;Unigene0040837;Unigene0041430;Unigene0041492;Unigene0042156;Unigene0045857;Unigene0048147;Unigene0048556;Unigene00…
M1+M6	Cellular component	GO:0044309	neuron spine	22	6.99414e-08	6.19481e-07	Unigene0002087;Unigene0004512;Unigene0004519;Unigene0005586;Unigene0006625;Unigene0023577;Unigene0029807;Unigene0030040;Unigene0030145;Unigene0030265;Unigene0030297;Unigene0033648;Unigene0035775;Unigene0036738;Unigene0039881;Unigene0040837;Unigene0042156;Unigene0044321;Unigene0045857;Unigene0046672;Unigene0051334;Unigene0051337
M1+M6	Cellular component	GO:0034703	cation channel complex	23	1.71407e-07	1.47601e-06	Unigene0004722;Unigene0006358;Unigene0021641;Unigene0027995;Unigene0033075;Unigene0033726;Unigene0034743;Unigene0037485;Unigene0038613;Unigene0039296;Unigene0039394;Unigene0039793;Unigene0040076;Unigene0047013;Unigene0047742;Unigene0048155;Unigene0049397;Unigene0051393;Unigene0051676;Unigene0052119;Unigene0052237;Unigene0052239;Unigene0052657
M1+M6	Cellular component	GO:0016023	cytoplasmic, membrane-bounded vesicle	68	5.90168e-06	4.94465e-05	Unigene0001804;Unigene0001997;Unigene0002323;Unigene0002819;Unigene0003698;Unigene0003755;Unigene0005277;Unigene0005281;Unigene0005390;Unigene0005460;Unigene0006121;Unigene0006744;Unigene0008670;Unigene0022780;Unigene0023917;Unigene0029756;Unigene0029807;Unigene0030980;Unigene0031166;Unigene0031606;Unigene0031712;Unigene0032206;Unigene0032508;Unigene0033091;Unigene0033555;Unigene0033726;Unigene00…
M1+M6	Cellular component	GO:0031410	cytoplasmic vesicle	69	8.18844e-06	6.68004e-05	Unigene0001804;Unigene0001997;Unigene0002323;Unigene0002819;Unigene0003698;Unigene0003755;Unigene0005277;Unigene0005281;Unigene0005390;Unigene0005460;Unigene0006121;Unigene0006744;Unigene0008670;Unigene0022780;Unigene0023917;Unigene0029756;Unigene0029807;Unigene0030980;Unigene0031166;Unigene0031606;Unigene0031712;Unigene0032206;Unigene0032508;Unigene0033091;Unigene0033555;Unigene0033726;Unigene00…
M1+M6	Cellular component	GO:0036477	somatodendritic compartment	14	3.33748e-05	0.000265287	Unigene0000239;Unigene0002087;Unigene0006096;Unigene0006625;Unigene0030040;Unigene0035193;Unigene0039793;Unigene0042171;Unigene0044147;Unigene0044148;Unigene0045857;Unigene0049225;Unigene0049392;Unigene0051334
M1+M6	Cellular component	GO:0034705	potassium channel complex	11	7.41873e-05	0.000574951	Unigene0004722;Unigene0027995;Unigene0037485;Unigene0039296;Unigene0039394;Unigene0047013;Unigene0047742;Unigene0048155;Unigene0051393;Unigene0052237;Unigene0052239
M1+M6	Cellular component	GO:0030425	dendrite	11	0.000499017	0.00375803	Unigene0000239;Unigene0002087;Unigene0006096;Unigene0006625;Unigene0030040;Unigene0035193;Unigene0039793;Unigene0044148;Unigene0045857;Unigene0049225;Unigene0051334
M1+M6	Cellular component	GO:0031256	leading edge membrane	8	0.000521275	0.00375803	Unigene0002087;Unigene0005066;Unigene0005885;Unigene0007288;Unigene0045857;Unigene0049510;Unigene0051030;Unigene0052239
M1+M6	Cellular component	GO:0032589	neuron projection membrane	8	0.000521275	0.00375803	Unigene0002087;Unigene0005066;Unigene0005885;Unigene0007288;Unigene0045857;Unigene0049510;Unigene0051030;Unigene0052239
M1+M6	Cellular component	GO:0031201	SNARE complex	3	0.000682461	0.00480825	Unigene0000701;Unigene0047372;Unigene0047373
M1+M6	Cellular component	GO:1902710	GABA receptor complex	3	0.00254989	0.0175659	Unigene0005066;Unigene0040652;Unigene0046609
M1+M6	Cellular component	GO:0038037	G-protein coupled receptor dimeric complex	3	0.00595646	0.0377852	Unigene0030434;Unigene0041492;Unigene0045857
M1+M6	Cellular component	GO:0043025	neuronal cell body	3	0.00595646	0.0377852	Unigene0002087;Unigene0042171;Unigene0049392
M1+M6	Cellular component	GO:0097648	G-protein coupled receptor complex	3	0.00595646	0.0377852	Unigene0030434;Unigene0041492;Unigene0045857
M1+M6	Cellular component	GO:0034704	calcium channel complex	7	0.00597251	0.0377852	Unigene0006358;Unigene0033075;Unigene0033726;Unigene0034743;Unigene0039793;Unigene0049397;Unigene0052119
M1+M6	Cellular component	GO:0043679	axon terminus	2	0.00775807	0.04625	Unigene0031166;Unigene0031167
M1+M6	Cellular component	GO:0044306	neuron projection terminus	2	0.00775807	0.04625	Unigene0031166;Unigene0031167
M1+M6	Cellular component	GO:0060187	cell pole	2	0.00775807	0.04625	Unigene0031166;Unigene0031167
M1+M6	Cellular component	GO:0031253	cell projection membrane	18	0.00888863	0.0519901	Unigene0002087;Unigene0005066;Unigene0005885;Unigene0007288;Unigene0008865;Unigene0022960;Unigene0027316;Unigene0036828;Unigene0038165;Unigene0042391;Unigene0045857;Unigene0048631;Unigene0049354;Unigene0049510;Unigene0051030;Unigene0051041;Unigene0052239;Unigene0054586
M1+M6	Cellular component	GO:0044433	cytoplasmic vesicle part	24	0.00991371	0.0569121	Unigene0001804;Unigene0003698;Unigene0003755;Unigene0005460;Unigene0022780;Unigene0030980;Unigene0032206;Unigene0032508;Unigene0033091;Unigene0033726;Unigene0036557;Unigene0039819;Unigene0040260;Unigene0040414;Unigene0041430;Unigene0042498;Unigene0042990;Unigene0043170;Unigene0044642;Unigene0044643;Unigene0047110;Unigene0051887;Unigene0052119;Unigene0052778
M1+M6	Molecular Function	GO:0015267	channel activity	60	5.69663e-12	1.04003e-09	Unigene0000310;Unigene0002044;Unigene0002158;Unigene0002956;Unigene0004722;Unigene0005066;Unigene0005239;Unigene0005277;Unigene0005291;Unigene0005460;Unigene0005586;Unigene0006096;Unigene0006716;Unigene0007364;Unigene0007779;Unigene0019228;Unigene0021641;Unigene0022976;Unigene0024040;Unigene0027995;Unigene0032005;Unigene0033075;Unigene0033125;Unigene0033726;Unigene0034535;Unigene0035405;Unigene00…
M1+M6	Molecular Function	GO:0015075	ion transmembrane transporter activity	98	7.50438e-12	1.04003e-09	Unigene0000310;Unigene0001302;Unigene0002044;Unigene0002158;Unigene0002803;Unigene0002905;Unigene0002956;Unigene0004722;Unigene0005066;Unigene0005239;Unigene0005277;Unigene0005291;Unigene0005460;Unigene0005586;Unigene0005616;Unigene0006024;Unigene0006096;Unigene0006716;Unigene0006903;Unigene0007364;Unigene0007779;Unigene0013997;Unigene0019228;Unigene0021641;Unigene0022976;Unigene0023917;Unigene00…
M1+M6	Molecular Function	GO:0022803	passive transmembrane transporter activity	60	7.86598e-12	1.04003e-09	Unigene0000310;Unigene0002044;Unigene0002158;Unigene0002956;Unigene0004722;Unigene0005066;Unigene0005239;Unigene0005277;Unigene0005291;Unigene0005460;Unigene0005586;Unigene0006096;Unigene0006716;Unigene0007364;Unigene0007779;Unigene0019228;Unigene0021641;Unigene0022976;Unigene0024040;Unigene0027995;Unigene0032005;Unigene0033075;Unigene0033125;Unigene0033726;Unigene0034535;Unigene0035405;Unigene00…
M1+M6	Molecular Function	GO:0005216	ion channel activity	59	9.45479e-12	1.04003e-09	Unigene0000310;Unigene0002044;Unigene0002158;Unigene0002956;Unigene0004722;Unigene0005066;Unigene0005239;Unigene0005277;Unigene0005291;Unigene0005460;Unigene0005586;Unigene0006096;Unigene0006716;Unigene0007364;Unigene0007779;Unigene0019228;Unigene0021641;Unigene0022976;Unigene0024040;Unigene0027995;Unigene0032005;Unigene0033075;Unigene0033125;Unigene0033726;Unigene0034535;Unigene0035405;Unigene00…
M1+M6	Molecular Function	GO:0022838	substrate-specific channel activity	59	9.45479e-12	1.04003e-09	Unigene0000310;Unigene0002044;Unigene0002158;Unigene0002956;Unigene0004722;Unigene0005066;Unigene0005239;Unigene0005277;Unigene0005291;Unigene0005460;Unigene0005586;Unigene0006096;Unigene0006716;Unigene0007364;Unigene0007779;Unigene0019228;Unigene0021641;Unigene0022976;Unigene0024040;Unigene0027995;Unigene0032005;Unigene0033075;Unigene0033125;Unigene0033726;Unigene0034535;Unigene0035405;Unigene00…
M1+M6	Molecular Function	GO:0046873	metal ion transmembrane transporter activity	42	7.056e-11	6.468e-09	Unigene0002803;Unigene0004722;Unigene0005277;Unigene0006024;Unigene0006096;Unigene0006716;Unigene0007364;Unigene0021641;Unigene0022976;Unigene0027949;Unigene0027995;Unigene0030980;Unigene0032005;Unigene0033726;Unigene0035039;Unigene0035405;Unigene0035775;Unigene0036404;Unigene0038613;Unigene0038952;Unigene0039793;Unigene0040076;Unigene0040237;Unigene0041130;Unigene0042438;Unigene0047110;Unigene00…
M1+M6	Molecular Function	GO:0022891	substrate-specific transmembrane transporter activity	100	1.02798e-10	8.07699e-09	Unigene0000310;Unigene0001302;Unigene0002044;Unigene0002158;Unigene0002803;Unigene0002905;Unigene0002956;Unigene0004722;Unigene0005066;Unigene0005239;Unigene0005277;Unigene0005291;Unigene0005460;Unigene0005586;Unigene0005616;Unigene0006024;Unigene0006096;Unigene0006716;Unigene0006903;Unigene0007364;Unigene0007779;Unigene0013997;Unigene0019228;Unigene0021641;Unigene0022976;Unigene0023917;Unigene00…
M1+M6	Molecular Function	GO:0022857	transmembrane transporter activity	105	3.96444e-10	2.72555e-08	Unigene0000310;Unigene0001302;Unigene0002044;Unigene0002158;Unigene0002803;Unigene0002905;Unigene0002956;Unigene0004722;Unigene0005066;Unigene0005239;Unigene0005277;Unigene0005291;Unigene0005460;Unigene0005586;Unigene0005616;Unigene0006024;Unigene0006096;Unigene0006716;Unigene0006903;Unigene0007364;Unigene0007779;Unigene0013997;Unigene0019228;Unigene0021641;Unigene0022976;Unigene0023917;Unigene00…
M1+M6	Molecular Function	GO:0008324	cation transmembrane transporter activity	65	5.29333e-10	3.23481e-08	Unigene0002803;Unigene0002956;Unigene0004722;Unigene0005277;Unigene0005460;Unigene0005586;Unigene0005616;Unigene0006024;Unigene0006096;Unigene0006716;Unigene0007364;Unigene0021641;Unigene0022976;Unigene0027949;Unigene0027995;Unigene0028322;Unigene0030980;Unigene0031166;Unigene0031167;Unigene0031712;Unigene0032005;Unigene0033075;Unigene0033726;Unigene0035039;Unigene0035405;Unigene0035775;Unigene00…
M1+M6	Molecular Function	GO:0005215	transporter activity	117	5.76261e-09	3.16944e-07	Unigene0000310;Unigene0000701;Unigene0001302;Unigene0002044;Unigene0002158;Unigene0002803;Unigene0002905;Unigene0002956;Unigene0003401;Unigene0004722;Unigene0005066;Unigene0005239;Unigene0005277;Unigene0005291;Unigene0005460;Unigene0005586;Unigene0005616;Unigene0006024;Unigene0006096;Unigene0006716;Unigene0006903;Unigene0007364;Unigene0007779;Unigene0013997;Unigene0019228;Unigene0021641;Unigene00…
M1+M6	Molecular Function	GO:0005261	cation channel activity	37	1.6248e-08	7.47649e-07	Unigene0002956;Unigene0004722;Unigene0005277;Unigene0005460;Unigene0005586;Unigene0006096;Unigene0006716;Unigene0007364;Unigene0021641;Unigene0022976;Unigene0027995;Unigene0032005;Unigene0033075;Unigene0033726;Unigene0035405;Unigene0036092;Unigene0036404;Unigene0037485;Unigene0038613;Unigene0039777;Unigene0039793;Unigene0040076;Unigene0040837;Unigene0043482;Unigene0043962;Unigene0047013;Unigene00…
M1+M6	Molecular Function	GO:0022892	substrate-specific transporter activity	105	1.63123e-08	7.47649e-07	Unigene0000310;Unigene0001302;Unigene0002044;Unigene0002158;Unigene0002803;Unigene0002905;Unigene0002956;Unigene0004722;Unigene0005066;Unigene0005239;Unigene0005277;Unigene0005291;Unigene0005460;Unigene0005586;Unigene0005616;Unigene0006024;Unigene0006096;Unigene0006716;Unigene0006903;Unigene0007364;Unigene0007779;Unigene0013997;Unigene0019228;Unigene0021641;Unigene0022598;Unigene0022976;Unigene00…
M1+M6	Molecular Function	GO:0015081	sodium ion transmembrane transporter activity	19	2.88558e-08	1.22082e-06	Unigene0006024;Unigene0006716;Unigene0021641;Unigene0022976;Unigene0030980;Unigene0035775;Unigene0038613;Unigene0038952;Unigene0040237;Unigene0041130;Unigene0042438;Unigene0049510;Unigene0050177;Unigene0050183;Unigene0050884;Unigene0051334;Unigene0051496;Unigene0051497;Unigene0051676
M1+M6	Molecular Function	GO:0022890	inorganic cation transmembrane transporter activity	46	1.36883e-07	5.37756e-06	Unigene0002803;Unigene0004722;Unigene0005277;Unigene0005616;Unigene0006024;Unigene0006096;Unigene0006716;Unigene0007364;Unigene0021641;Unigene0022976;Unigene0027949;Unigene0027995;Unigene0028322;Unigene0030980;Unigene0031712;Unigene0032005;Unigene0033726;Unigene0035039;Unigene0035405;Unigene0035775;Unigene0036404;Unigene0038613;Unigene0038952;Unigene0039793;Unigene0040076;Unigene0040237;Unigene00…
M1+M6	Molecular Function	GO:0015077	monovalent inorganic cation transmembrane transporter activity	35	1.71988e-07	6.30623e-06	Unigene0004722;Unigene0005616;Unigene0006024;Unigene0006716;Unigene0007364;Unigene0021641;Unigene0022976;Unigene0027949;Unigene0027995;Unigene0028322;Unigene0030980;Unigene0031712;Unigene0035405;Unigene0035775;Unigene0036404;Unigene0038613;Unigene0038952;Unigene0040076;Unigene0040237;Unigene0041130;Unigene0042438;Unigene0047742;Unigene0048323;Unigene0049510;Unigene0050050;Unigene0050177;Unigene00…
M1+M6	Molecular Function	GO:0022836	gated channel activity	28	4.46094e-07	1.52881e-05	Unigene0000310;Unigene0002044;Unigene0002158;Unigene0005066;Unigene0005291;Unigene0005460;Unigene0006716;Unigene0007364;Unigene0007779;Unigene0019228;Unigene0022976;Unigene0024040;Unigene0033125;Unigene0035405;Unigene0037263;Unigene0037266;Unigene0038613;Unigene0039793;Unigene0040652;Unigene0040837;Unigene0041430;Unigene0046609;Unigene0047384;Unigene0047742;Unigene0049654;Unigene0050884;Unigene00…
M1+M6	Molecular Function	GO:0015291	secondary active transmembrane transporter activity	26	4.72542e-07	1.52881e-05	Unigene0002905;Unigene0005616;Unigene0006024;Unigene0006903;Unigene0013997;Unigene0028762;Unigene0030980;Unigene0031166;Unigene0031167;Unigene0032027;Unigene0032206;Unigene0035071;Unigene0035775;Unigene0038952;Unigene0039417;Unigene0040237;Unigene0041130;Unigene0042438;Unigene0044147;Unigene0044148;Unigene0045652;Unigene0049392;Unigene0049510;Unigene0050177;Unigene0050183;Unigene0051497
M1+M6	Molecular Function	GO:0022804	active transmembrane transporter activity	35	1.39859e-06	4.27347e-05	Unigene0002905;Unigene0005616;Unigene0006024;Unigene0006903;Unigene0013997;Unigene0023917;Unigene0027949;Unigene0028322;Unigene0028762;Unigene0030980;Unigene0031166;Unigene0031167;Unigene0032027;Unigene0032206;Unigene0035071;Unigene0035775;Unigene0038952;Unigene0039417;Unigene0040237;Unigene0040594;Unigene0041130;Unigene0042438;Unigene0044147;Unigene0044148;Unigene0045652;Unigene0047013;Unigene00…
M1+M6	Molecular Function	GO:0016917	GABA receptor activity	5	4.43646e-06	0.000128424	Unigene0002044;Unigene0005066;Unigene0033125;Unigene0040652;Unigene0046609
M1+M6	Molecular Function	GO:0015276	ligand-gated ion channel activity	20	8.38814e-06	0.000219689	Unigene0000310;Unigene0002044;Unigene0002158;Unigene0005066;Unigene0005291;Unigene0005460;Unigene0007779;Unigene0019228;Unigene0024040;Unigene0033125;Unigene0035405;Unigene0037263;Unigene0037266;Unigene0040652;Unigene0040837;Unigene0041430;Unigene0046609;Unigene0047384;Unigene0049654;Unigene0052657
M1+M6	Molecular Function	GO:0022834	ligand-gated channel activity	20	8.38814e-06	0.000219689	Unigene0000310;Unigene0002044;Unigene0002158;Unigene0005066;Unigene0005291;Unigene0005460;Unigene0007779;Unigene0019228;Unigene0024040;Unigene0033125;Unigene0035405;Unigene0037263;Unigene0037266;Unigene0040652;Unigene0040837;Unigene0041430;Unigene0046609;Unigene0047384;Unigene0049654;Unigene0052657
M1+M6	Molecular Function	GO:0035254	glutamate receptor binding	9	9.56816e-06	0.000239204	Unigene0004512;Unigene0006971;Unigene0029807;Unigene0030265;Unigene0030267;Unigene0030297;Unigene0042156;Unigene0051653;Unigene0052119
M1+M6	Molecular Function	GO:0016247	channel regulator activity	20	2.65383e-05	0.000634612	Unigene0005460;Unigene0006096;Unigene0006303;Unigene0012736;Unigene0022976;Unigene0028102;Unigene0030145;Unigene0037485;Unigene0038613;Unigene0039394;Unigene0040076;Unigene0040260;Unigene0040404;Unigene0040594;Unigene0043489;Unigene0044255;Unigene0047077;Unigene0048155;Unigene0049494;Unigene0050884
M1+M6	Molecular Function	GO:0099600	transmembrane receptor activity	69	2.98522e-05	0.000684113	Unigene0000310;Unigene0000526;Unigene0002044;Unigene0002158;Unigene0005031;Unigene0005066;Unigene0005229;Unigene0005291;Unigene0005460;Unigene0006096;Unigene0006203;Unigene0007779;Unigene0007963;Unigene0008584;Unigene0019228;Unigene0023537;Unigene0024040;Unigene0024593;Unigene0024594;Unigene0026574;Unigene0028615;Unigene0029804;Unigene0030145;Unigene0030434;Unigene0031561;Unigene0031592;Unigene00…
M1+M6	Molecular Function	GO:0015293	symporter activity	12	3.3886e-05	0.000716819	Unigene0006024;Unigene0030980;Unigene0031166;Unigene0031167;Unigene0038952;Unigene0040237;Unigene0041130;Unigene0044147;Unigene0044148;Unigene0049510;Unigene0050177;Unigene0050183
M1+M6	Molecular Function	GO:0015294	solute:cation symporter activity	12	3.3886e-05	0.000716819	Unigene0006024;Unigene0030980;Unigene0031166;Unigene0031167;Unigene0038952;Unigene0040237;Unigene0041130;Unigene0044147;Unigene0044148;Unigene0049510;Unigene0050177;Unigene0050183
M1+M6	Molecular Function	GO:0030159	receptor signaling complex scaffold activity	4	5.2294e-05	0.00106525	Unigene0030265;Unigene0030267;Unigene0030297;Unigene0042156
M1+M6	Molecular Function	GO:0015079	potassium ion transmembrane transporter activity	13	6.32892e-05	0.00121221	Unigene0004722;Unigene0007364;Unigene0027949;Unigene0027995;Unigene0035405;Unigene0036404;Unigene0040076;Unigene0047742;Unigene0048323;Unigene0051334;Unigene0051337;Unigene0051393;Unigene0052237
M1+M6	Molecular Function	GO:0019905	syntaxin binding	7	6.39165e-05	0.00121221	Unigene0000701;Unigene0003755;Unigene0006024;Unigene0045581;Unigene0047372;Unigene0047373;Unigene0051722
M1+M6	Molecular Function	GO:0008509	anion transmembrane transporter activity	32	7.44284e-05	0.00136452	Unigene0001302;Unigene0002044;Unigene0002905;Unigene0005066;Unigene0005239;Unigene0005291;Unigene0006903;Unigene0013997;Unigene0019228;Unigene0024040;Unigene0028762;Unigene0030980;Unigene0031166;Unigene0031167;Unigene0032206;Unigene0034535;Unigene0037196;Unigene0040237;Unigene0040594;Unigene0040652;Unigene0041130;Unigene0042438;Unigene0043482;Unigene0044147;Unigene0044148;Unigene0045034;Unigene00…
M1+M6	Molecular Function	GO:0004888	transmembrane signaling receptor activity	62	0.000212195	0.00376475	Unigene0000526;Unigene0002044;Unigene0005031;Unigene0005066;Unigene0005229;Unigene0006096;Unigene0006203;Unigene0007779;Unigene0007963;Unigene0008584;Unigene0023537;Unigene0024040;Unigene0024593;Unigene0024594;Unigene0026574;Unigene0028615;Unigene0029804;Unigene0030145;Unigene0030434;Unigene0031561;Unigene0031592;Unigene0031642;Unigene0031714;Unigene0032344;Unigene0032627;Unigene0033125;Unigene00…
M1+M6	Molecular Function	GO:0005003	ephrin receptor activity	6	0.000221488	0.00380682	Unigene0006203;Unigene0008584;Unigene0031714;Unigene0033196;Unigene0041412;Unigene0043375
M1+M6	Molecular Function	GO:0032947	protein complex scaffold	5	0.000417427	0.00695712	Unigene0030265;Unigene0030267;Unigene0030297;Unigene0040479;Unigene0042156
M1+M6	Molecular Function	GO:0043539	protein serine/threonine kinase activator activity	3	0.000615823	0.00989856	Unigene0030852;Unigene0044321;Unigene0068258
M1+M6	Molecular Function	GO:0004872	receptor activity	78	0.000629908	0.00989856	Unigene0000310;Unigene0000526;Unigene0002044;Unigene0002158;Unigene0003401;Unigene0005031;Unigene0005066;Unigene0005229;Unigene0005291;Unigene0005460;Unigene0006096;Unigene0006203;Unigene0007779;Unigene0007963;Unigene0008584;Unigene0014604;Unigene0019228;Unigene0023537;Unigene0024040;Unigene0024593;Unigene0024594;Unigene0026574;Unigene0028615;Unigene0029756;Unigene0029804;Unigene0030145;Unigene00…
M1+M6	Molecular Function	GO:0008066	glutamate receptor activity	5	0.000776395	0.0117773	Unigene0006096;Unigene0037263;Unigene0037266;Unigene0040837;Unigene0041430
M1+M6	Molecular Function	GO:0005267	potassium channel activity	10	0.000792291	0.0117773	Unigene0004722;Unigene0007364;Unigene0027995;Unigene0035405;Unigene0036404;Unigene0040076;Unigene0047742;Unigene0048323;Unigene0051393;Unigene0052237
M1+M6	Molecular Function	GO:0005102	receptor binding	81	0.000913775	0.0132257	Unigene0000100;Unigene0000252;Unigene0000280;Unigene0000627;Unigene0000990;Unigene0001014;Unigene0001414;Unigene0002437;Unigene0002819;Unigene0003934;Unigene0004512;Unigene0004554;Unigene0005467;Unigene0005511;Unigene0006303;Unigene0006971;Unigene0007963;Unigene0017682;Unigene0019631;Unigene0021374;Unigene0022598;Unigene0022780;Unigene0024532;Unigene0026605;Unigene0028102;Unigene0028615;Unigene00…
M1+M6	Molecular Function	GO:0004871	signal transducer activity	76	0.000944684	0.0133225	Unigene0000526;Unigene0002044;Unigene0003401;Unigene0005031;Unigene0005066;Unigene0005229;Unigene0005460;Unigene0006096;Unigene0006203;Unigene0007779;Unigene0007963;Unigene0008584;Unigene0014604;Unigene0017682;Unigene0023537;Unigene0024040;Unigene0024593;Unigene0024594;Unigene0026574;Unigene0028615;Unigene0029756;Unigene0029804;Unigene0030145;Unigene0030321;Unigene0030434;Unigene0031561;Unigene00…
M1+M6	Molecular Function	GO:0000149	SNARE binding	9	0.00105489	0.0145047	Unigene0000701;Unigene0003755;Unigene0004844;Unigene0006024;Unigene0038181;Unigene0045581;Unigene0047372;Unigene0047373;Unigene0051722
M1+M6	Molecular Function	GO:0038023	signaling receptor activity	69	0.00125874	0.0168855	Unigene0000526;Unigene0002044;Unigene0003401;Unigene0005031;Unigene0005066;Unigene0005229;Unigene0006096;Unigene0006203;Unigene0007779;Unigene0007963;Unigene0008584;Unigene0014604;Unigene0023537;Unigene0024040;Unigene0024593;Unigene0024594;Unigene0026574;Unigene0028615;Unigene0029756;Unigene0029804;Unigene0030145;Unigene0030434;Unigene0031561;Unigene0031592;Unigene0031642;Unigene0031714;Unigene00…
M1+M6	Molecular Function	GO:0005343	organic acid:sodium symporter activity	6	0.00142553	0.0186677	Unigene0038952;Unigene0040237;Unigene0041130;Unigene0049510;Unigene0050177;Unigene0050183
M1+M6	Molecular Function	GO:0015370	solute:sodium symporter activity	7	0.00173163	0.0221487	Unigene0006024;Unigene0038952;Unigene0040237;Unigene0041130;Unigene0049510;Unigene0050177;Unigene0050183
M1+M6	Molecular Function	GO:0005253	anion channel activity	11	0.00193326	0.0241657	Unigene0002044;Unigene0005066;Unigene0005239;Unigene0005291;Unigene0019228;Unigene0024040;Unigene0034535;Unigene0040594;Unigene0040652;Unigene0045034;Unigene0046609
M1+M6	Molecular Function	GO:0005230	extracellular ligand-gated ion channel activity	9	0.0025995	0.0317717	Unigene0000310;Unigene0007779;Unigene0019228;Unigene0037263;Unigene0037266;Unigene0040652;Unigene0040837;Unigene0041430;Unigene0047384
M1+M6	Molecular Function	GO:0015296	anion:cation symporter activity	4	0.0027671	0.0330849	Unigene0030980;Unigene0040237;Unigene0044147;Unigene0044148
M1+M6	Molecular Function	GO:0005416	cation:amino acid symporter activity	5	0.00319244	0.0373583	Unigene0031166;Unigene0031167;Unigene0041130;Unigene0049510;Unigene0050183
M1+M6	Molecular Function	GO:0005310	dicarboxylic acid transmembrane transporter activity	5	0.00462148	0.0521584	Unigene0013997;Unigene0032206;Unigene0040237;Unigene0045652;Unigene0049510
M1+M6	Molecular Function	GO:0004970	ionotropic glutamate receptor activity	4	0.00464684	0.0521584	Unigene0037263;Unigene0037266;Unigene0040837;Unigene0041430
M1+M6	Molecular Function	GO:0005272	sodium channel activity	6	0.00513545	0.05649	Unigene0006716;Unigene0021641;Unigene0022976;Unigene0038613;Unigene0050884;Unigene0051676
M1+M6	Molecular Function	GO:0060089	molecular transducer activity	91	0.00531983	0.05712	Unigene0000310;Unigene0000526;Unigene0002044;Unigene0002158;Unigene0003401;Unigene0005031;Unigene0005066;Unigene0005229;Unigene0005291;Unigene0005460;Unigene0006096;Unigene0006203;Unigene0006303;Unigene0007779;Unigene0007963;Unigene0008584;Unigene0014604;Unigene0019228;Unigene0019238;Unigene0023537;Unigene0024040;Unigene0024593;Unigene0024594;Unigene0026574;Unigene0028615;Unigene0029756;Unigene00…
M1+M6	Molecular Function	GO:0005248	voltage-gated sodium channel activity	3	0.00540044	0.05712	Unigene0022976;Unigene0038613;Unigene0050884
M1+M6	Molecular Function	GO:0005231	excitatory extracellular ligand-gated ion channel activity	7	0.00619463	0.0608402	Unigene0000310;Unigene0007779;Unigene0037263;Unigene0037266;Unigene0040837;Unigene0041430;Unigene0047384
M1+M6	Molecular Function	GO:0005244	voltage-gated ion channel activity	7	0.00619463	0.0608402	Unigene0007364;Unigene0022976;Unigene0035405;Unigene0038613;Unigene0039793;Unigene0050884;Unigene0052237
M1+M6	Molecular Function	GO:0016597	amino acid binding	7	0.00619463	0.0608402	Unigene0006096;Unigene0019228;Unigene0038835;Unigene0040837;Unigene0045652;Unigene0050416;Unigene0050820
M1+M6	Molecular Function	GO:0022832	voltage-gated channel activity	7	0.00619463	0.0608402	Unigene0007364;Unigene0022976;Unigene0035405;Unigene0038613;Unigene0039793;Unigene0050884;Unigene0052237
M1+M6	Molecular Function	GO:0098772	molecular function regulator	68	0.00634961	0.0612682	Unigene0000007;Unigene0000389;Unigene0000572;Unigene0001338;Unigene0001963;Unigene0005460;Unigene0005940;Unigene0006096;Unigene0006303;Unigene0006349;Unigene0006971;Unigene0012736;Unigene0013348;Unigene0021230;Unigene0022598;Unigene0022976;Unigene0023125;Unigene0025843;Unigene0027804;Unigene0027806;Unigene0028102;Unigene0029548;Unigene0030145;Unigene0030589;Unigene0030852;Unigene0031712;Unigene00…
M1+M6	Molecular Function	GO:0022843	voltage-gated cation channel activity	6	0.00668037	0.0633483	Unigene0007364;Unigene0022976;Unigene0035405;Unigene0038613;Unigene0039793;Unigene0050884
M1+M6	Molecular Function	GO:0015301	anion:anion antiporter activity	4	0.00722714	0.0653253	Unigene0006903;Unigene0028762;Unigene0042438;Unigene0049392
M1+M6	Molecular Function	GO:0005280	hydrogen:amino acid symporter activity	2	0.00724517	0.0653253	Unigene0031166;Unigene0031167
M1+M6	Molecular Function	GO:0015295	solute:proton symporter activity	2	0.00724517	0.0653253	Unigene0031166;Unigene0031167
M1+M6	Biological Process	GO:0007267	cell-cell signaling	126	3.14763e-33	9.48066e-30	Unigene0000100;Unigene0000280;Unigene0000507;Unigene0000990;Unigene0001708;Unigene0001804;Unigene0002044;Unigene0002819;Unigene0003755;Unigene0003934;Unigene0004293;Unigene0004512;Unigene0004519;Unigene0005066;Unigene0005467;Unigene0005885;Unigene0005940;Unigene0006024;Unigene0006096;Unigene0006625;Unigene0006716;Unigene0007228;Unigene0007779;Unigene0008989;Unigene0009034;Unigene0013348;Unigene00…
M1+M6	Biological Process	GO:0007268	synaptic transmission	77	3.51121e-27	2.64394e-24	Unigene0000100;Unigene0000280;Unigene0000507;Unigene0001708;Unigene0002819;Unigene0003755;Unigene0003934;Unigene0004293;Unigene0004512;Unigene0004519;Unigene0005066;Unigene0005885;Unigene0006024;Unigene0006625;Unigene0006716;Unigene0007228;Unigene0007779;Unigene0009034;Unigene0022054;Unigene0023577;Unigene0023630;Unigene0024040;Unigene0027804;Unigene0027806;Unigene0028102;Unigene0028524;Unigene00…
M1+M6	Biological Process	GO:0099536	synaptic signaling	77	3.51121e-27	2.64394e-24	Unigene0000100;Unigene0000280;Unigene0000507;Unigene0001708;Unigene0002819;Unigene0003755;Unigene0003934;Unigene0004293;Unigene0004512;Unigene0004519;Unigene0005066;Unigene0005885;Unigene0006024;Unigene0006625;Unigene0006716;Unigene0007228;Unigene0007779;Unigene0009034;Unigene0022054;Unigene0023577;Unigene0023630;Unigene0024040;Unigene0027804;Unigene0027806;Unigene0028102;Unigene0028524;Unigene00…
M1+M6	Biological Process	GO:0099537	trans-synaptic signaling	77	3.51121e-27	2.64394e-24	Unigene0000100;Unigene0000280;Unigene0000507;Unigene0001708;Unigene0002819;Unigene0003755;Unigene0003934;Unigene0004293;Unigene0004512;Unigene0004519;Unigene0005066;Unigene0005885;Unigene0006024;Unigene0006625;Unigene0006716;Unigene0007228;Unigene0007779;Unigene0009034;Unigene0022054;Unigene0023577;Unigene0023630;Unigene0024040;Unigene0027804;Unigene0027806;Unigene0028102;Unigene0028524;Unigene00…
M1+M6	Biological Process	GO:0044708	single-organism behavior	76	2.24458e-23	1.35213e-20	Unigene0000280;Unigene0000627;Unigene0002345;Unigene0002437;Unigene0002641;Unigene0004293;Unigene0004512;Unigene0004655;Unigene0006024;Unigene0006089;Unigene0006096;Unigene0006121;Unigene0006303;Unigene0006716;Unigene0007779;Unigene0008989;Unigene0009004;Unigene0009080;Unigene0010756;Unigene0012599;Unigene0020013;Unigene0021374;Unigene0021641;Unigene0022533;Unigene0023630;Unigene0029807;Unigene00…
M1+M6	Biological Process	GO:0050804	modulation of synaptic transmission	58	4.37793e-23	2.19772e-20	Unigene0000280;Unigene0002819;Unigene0003755;Unigene0003934;Unigene0004293;Unigene0004512;Unigene0004519;Unigene0005885;Unigene0006024;Unigene0006716;Unigene0007228;Unigene0007779;Unigene0023577;Unigene0023630;Unigene0027804;Unigene0027806;Unigene0028102;Unigene0028524;Unigene0029807;Unigene0030040;Unigene0030265;Unigene0030267;Unigene0030297;Unigene0033648;Unigene0034569;Unigene0035157;Unigene00…
M1+M6	Biological Process	GO:0048699	generation of neurons	142	3.8822e-22	1.67045e-19	Unigene0000100;Unigene0000239;Unigene0000280;Unigene0000627;Unigene0001071;Unigene0001414;Unigene0001795;Unigene0002323;Unigene0002345;Unigene0002437;Unigene0004236;Unigene0004728;Unigene0004772;Unigene0004916;Unigene0005046;Unigene0005281;Unigene0005390;Unigene0005643;Unigene0005954;Unigene0006089;Unigene0006303;Unigene0007269;Unigene0007779;Unigene0008027;Unigene0008584;Unigene0008592;Unigene00…
M1+M6	Biological Process	GO:0022008	neurogenesis	145	4.92585e-21	1.85458e-18	Unigene0000100;Unigene0000239;Unigene0000280;Unigene0000627;Unigene0001071;Unigene0001414;Unigene0001795;Unigene0002323;Unigene0002345;Unigene0002428;Unigene0002437;Unigene0004236;Unigene0004728;Unigene0004772;Unigene0004916;Unigene0005046;Unigene0005281;Unigene0005390;Unigene0005643;Unigene0005954;Unigene0006089;Unigene0006303;Unigene0007269;Unigene0007779;Unigene0008027;Unigene0008584;Unigene00…
M1+M6	Biological Process	GO:0030182	neuron differentiation	131	6.31974e-21	2.115e-18	Unigene0000100;Unigene0000239;Unigene0000280;Unigene0000627;Unigene0001071;Unigene0001414;Unigene0001795;Unigene0002323;Unigene0002345;Unigene0002437;Unigene0004236;Unigene0004728;Unigene0004772;Unigene0004916;Unigene0005046;Unigene0005281;Unigene0005390;Unigene0005643;Unigene0005954;Unigene0006089;Unigene0006303;Unigene0007269;Unigene0007779;Unigene0008027;Unigene0008584;Unigene0008647;Unigene00…
M1+M6	Biological Process	GO:0007610	behavior	111	1.10992e-20	3.34307e-18	Unigene0000280;Unigene0000627;Unigene0000990;Unigene0001014;Unigene0001708;Unigene0002345;Unigene0002437;Unigene0002641;Unigene0002819;Unigene0004293;Unigene0004512;Unigene0004655;Unigene0004728;Unigene0005467;Unigene0006024;Unigene0006089;Unigene0006096;Unigene0006121;Unigene0006303;Unigene0006716;Unigene0007779;Unigene0008989;Unigene0009004;Unigene0009080;Unigene0010756;Unigene0012599;Unigene00…
M1+M6	Biological Process	GO:0048666	neuron development	118	4.19975e-20	1.05786e-17	Unigene0000100;Unigene0000239;Unigene0000280;Unigene0000627;Unigene0001071;Unigene0001414;Unigene0001795;Unigene0002323;Unigene0002345;Unigene0002437;Unigene0004236;Unigene0004728;Unigene0004772;Unigene0004916;Unigene0005046;Unigene0005281;Unigene0005390;Unigene0005643;Unigene0005954;Unigene0006089;Unigene0006303;Unigene0007269;Unigene0007779;Unigene0008027;Unigene0008584;Unigene0008647;Unigene00…
M1+M6	Biological Process	GO:0007399	nervous system development	175	4.21458e-20	1.05786e-17	Unigene0000100;Unigene0000239;Unigene0000280;Unigene0000627;Unigene0001071;Unigene0001414;Unigene0001795;Unigene0001862;Unigene0002323;Unigene0002345;Unigene0002428;Unigene0002437;Unigene0003903;Unigene0004236;Unigene0004728;Unigene0004772;Unigene0004916;Unigene0005046;Unigene0005123;Unigene0005281;Unigene0005390;Unigene0005643;Unigene0005954;Unigene0006024;Unigene0006089;Unigene0006303;Unigene00…
M1+M6	Biological Process	GO:0031175	neuron projection development	103	4.53192e-17	1.05001e-14	Unigene0000100;Unigene0000239;Unigene0000280;Unigene0000627;Unigene0001071;Unigene0001414;Unigene0001795;Unigene0002323;Unigene0002345;Unigene0002437;Unigene0004236;Unigene0004728;Unigene0004772;Unigene0004916;Unigene0005046;Unigene0005281;Unigene0005390;Unigene0005643;Unigene0005954;Unigene0006089;Unigene0006303;Unigene0007269;Unigene0007779;Unigene0008584;Unigene0008647;Unigene0009004;Unigene00…
M1+M6	Biological Process	GO:0001505	regulation of neurotransmitter levels	31	7.72987e-16	1.66303e-13	Unigene0003698;Unigene0006024;Unigene0006303;Unigene0006716;Unigene0007112;Unigene0007228;Unigene0022533;Unigene0030363;Unigene0030980;Unigene0031606;Unigene0035551;Unigene0035552;Unigene0038930;Unigene0039777;Unigene0039793;Unigene0039819;Unigene0040404;Unigene0040628;Unigene0040829;Unigene0041169;Unigene0041737;Unigene0042116;Unigene0043386;Unigene0044255;Unigene0045081;Unigene0045581;Unigene00…
M1+M6	Biological Process	GO:0048812	neuron projection morphogenesis	82	1.01894e-15	2.04603e-13	Unigene0000280;Unigene0000627;Unigene0001071;Unigene0002323;Unigene0002345;Unigene0002437;Unigene0004236;Unigene0004772;Unigene0004916;Unigene0005046;Unigene0005281;Unigene0005390;Unigene0005643;Unigene0005954;Unigene0006303;Unigene0007779;Unigene0008584;Unigene0009004;Unigene0009080;Unigene0012776;Unigene0014604;Unigene0015406;Unigene0015559;Unigene0020013;Unigene0020272;Unigene0025555;Unigene00…
M1+M6	Biological Process	GO:0007611	learning or memory	40	1.37912e-15	2.44347e-13	Unigene0000280;Unigene0002641;Unigene0004293;Unigene0004512;Unigene0006024;Unigene0006096;Unigene0006121;Unigene0006303;Unigene0006716;Unigene0007779;Unigene0023630;Unigene0030265;Unigene0030267;Unigene0030297;Unigene0030980;Unigene0033125;Unigene0033840;Unigene0035157;Unigene0035193;Unigene0035516;Unigene0035807;Unigene0035971;Unigene0036303;Unigene0039317;Unigene0040837;Unigene0041310;Unigene00…
M1+M6	Biological Process	GO:0050890	cognition	40	1.37912e-15	2.44347e-13	Unigene0000280;Unigene0002641;Unigene0004293;Unigene0004512;Unigene0006024;Unigene0006096;Unigene0006121;Unigene0006303;Unigene0006716;Unigene0007779;Unigene0023630;Unigene0030265;Unigene0030267;Unigene0030297;Unigene0030980;Unigene0033125;Unigene0033840;Unigene0035157;Unigene0035193;Unigene0035516;Unigene0035807;Unigene0035971;Unigene0036303;Unigene0039317;Unigene0040837;Unigene0041310;Unigene00…
M1+M6	Biological Process	GO:0030030	cell projection organization	137	2.62675e-15	4.39543e-13	Unigene0000100;Unigene0000239;Unigene0000280;Unigene0000627;Unigene0001071;Unigene0001414;Unigene0001795;Unigene0001963;Unigene0002323;Unigene0002345;Unigene0002428;Unigene0002437;Unigene0003810;Unigene0004034;Unigene0004236;Unigene0004728;Unigene0004760;Unigene0004772;Unigene0004916;Unigene0005046;Unigene0005277;Unigene0005281;Unigene0005390;Unigene0005559;Unigene0005586;Unigene0005643;Unigene00…
M1+M6	Biological Process	GO:0032990	cell part morphogenesis	95	3.65834e-15	5.50946e-13	Unigene0000280;Unigene0000627;Unigene0001071;Unigene0001963;Unigene0002323;Unigene0002345;Unigene0002437;Unigene0003810;Unigene0004236;Unigene0004760;Unigene0004772;Unigene0004916;Unigene0005046;Unigene0005281;Unigene0005390;Unigene0005559;Unigene0005586;Unigene0005643;Unigene0005954;Unigene0006303;Unigene0007779;Unigene0008584;Unigene0009004;Unigene0009080;Unigene0012776;Unigene0014604;Unigene00…
M1+M6	Biological Process	GO:0048858	cell projection morphogenesis	95	3.65834e-15	5.50946e-13	Unigene0000280;Unigene0000627;Unigene0001071;Unigene0001963;Unigene0002323;Unigene0002345;Unigene0002437;Unigene0003810;Unigene0004236;Unigene0004760;Unigene0004772;Unigene0004916;Unigene0005046;Unigene0005281;Unigene0005390;Unigene0005559;Unigene0005586;Unigene0005643;Unigene0005954;Unigene0006303;Unigene0007779;Unigene0008584;Unigene0009004;Unigene0009080;Unigene0012776;Unigene0014604;Unigene00…
M1+M6	Biological Process	GO:0007626	locomotory behavior	34	1.08801e-13	1.56051e-11	Unigene0000627;Unigene0000990;Unigene0002437;Unigene0002819;Unigene0004655;Unigene0006089;Unigene0009004;Unigene0010756;Unigene0012599;Unigene0014604;Unigene0020013;Unigene0021374;Unigene0021641;Unigene0028524;Unigene0029807;Unigene0030265;Unigene0030267;Unigene0030297;Unigene0030674;Unigene0032042;Unigene0036303;Unigene0036341;Unigene0039777;Unigene0040837;Unigene0041202;Unigene0043128;Unigene00…
M1+M6	Biological Process	GO:0050877	neurological system process	96	4.42219e-13	5.81653e-11	Unigene0000007;Unigene0000280;Unigene0000627;Unigene0000865;Unigene0000990;Unigene0001862;Unigene0002641;Unigene0002803;Unigene0002819;Unigene0002956;Unigene0003903;Unigene0004293;Unigene0004512;Unigene0005046;Unigene0006024;Unigene0006096;Unigene0006121;Unigene0006303;Unigene0006551;Unigene0006716;Unigene0007779;Unigene0009004;Unigene0010756;Unigene0020013;Unigene0021641;Unigene0023630;Unigene00…
M1+M6	Biological Process	GO:0050803	regulation of synapse structure or activity	31	4.44157e-13	5.81653e-11	Unigene0003755;Unigene0003934;Unigene0004293;Unigene0004512;Unigene0004519;Unigene0005885;Unigene0007228;Unigene0029807;Unigene0030040;Unigene0030265;Unigene0030267;Unigene0030297;Unigene0033648;Unigene0034569;Unigene0035021;Unigene0035516;Unigene0036303;Unigene0039317;Unigene0039777;Unigene0040837;Unigene0043375;Unigene0044558;Unigene0044642;Unigene0044643;Unigene0045581;Unigene0047372;Unigene00…
M1+M6	Biological Process	GO:0048167	regulation of synaptic plasticity	29	5.44479e-13	6.83321e-11	Unigene0003755;Unigene0003934;Unigene0004293;Unigene0004512;Unigene0004519;Unigene0005885;Unigene0007228;Unigene0029807;Unigene0030040;Unigene0030265;Unigene0030267;Unigene0030297;Unigene0033648;Unigene0034569;Unigene0036303;Unigene0039317;Unigene0039777;Unigene0040837;Unigene0043375;Unigene0044558;Unigene0044642;Unigene0044643;Unigene0045581;Unigene0047372;Unigene0047373;Unigene0047815;Unigene00…
M1+M6	Biological Process	GO:0000902	cell morphogenesis	120	5.05562e-12	6.09102e-10	Unigene0000280;Unigene0000507;Unigene0000627;Unigene0001071;Unigene0001963;Unigene0002323;Unigene0002345;Unigene0002428;Unigene0002437;Unigene0003810;Unigene0004236;Unigene0004760;Unigene0004772;Unigene0004916;Unigene0005046;Unigene0005281;Unigene0005390;Unigene0005559;Unigene0005586;Unigene0005643;Unigene0005954;Unigene0006303;Unigene0007779;Unigene0008584;Unigene0009004;Unigene0009080;Unigene00…
M1+M6	Biological Process	GO:0030001	metal ion transport	87	9.34196e-11	1.08223e-08	Unigene0000507;Unigene0000990;Unigene0002803;Unigene0004722;Unigene0005277;Unigene0005460;Unigene0005586;Unigene0005616;Unigene0006096;Unigene0006551;Unigene0006716;Unigene0006920;Unigene0006971;Unigene0007364;Unigene0007779;Unigene0021641;Unigene0022976;Unigene0025843;Unigene0027949;Unigene0027995;Unigene0028102;Unigene0028762;Unigene0030980;Unigene0031166;Unigene0031642;Unigene0032005;Unigene00…
M1+M6	Biological Process	GO:0030534	adult behavior	23	1.33102e-10	1.48483e-08	Unigene0000627;Unigene0002437;Unigene0004655;Unigene0006089;Unigene0007779;Unigene0010756;Unigene0012599;Unigene0020013;Unigene0021374;Unigene0021641;Unigene0022533;Unigene0030674;Unigene0036303;Unigene0036341;Unigene0039317;Unigene0039777;Unigene0040840;Unigene0043128;Unigene0043132;Unigene0044051;Unigene0045710;Unigene0047384;Unigene0048373
M1+M6	Biological Process	GO:0006811	ion transport	146	2.45969e-10	2.64593e-08	Unigene0000280;Unigene0000310;Unigene0000507;Unigene0000990;Unigene0001302;Unigene0002044;Unigene0002158;Unigene0002803;Unigene0002905;Unigene0002956;Unigene0004722;Unigene0005066;Unigene0005239;Unigene0005273;Unigene0005277;Unigene0005291;Unigene0005460;Unigene0005586;Unigene0005616;Unigene0006024;Unigene0006096;Unigene0006551;Unigene0006716;Unigene0006903;Unigene0006920;Unigene0006971;Unigene00…
M1+M6	Biological Process	GO:0048468	cell development	167	3.80864e-10	3.95573e-08	Unigene0000100;Unigene0000239;Unigene0000280;Unigene0000507;Unigene0000627;Unigene0001071;Unigene0001414;Unigene0001795;Unigene0002323;Unigene0002345;Unigene0002428;Unigene0002437;Unigene0003707;Unigene0004236;Unigene0004293;Unigene0004728;Unigene0004750;Unigene0004772;Unigene0004916;Unigene0005046;Unigene0005281;Unigene0005390;Unigene0005643;Unigene0005954;Unigene0006089;Unigene0006303;Unigene00…
M1+M6	Biological Process	GO:0007154	cell communication	389	1.01886e-09	1.02294e-07	Unigene0000100;Unigene0000137;Unigene0000252;Unigene0000280;Unigene0000507;Unigene0000526;Unigene0000627;Unigene0000681;Unigene0000710;Unigene0000990;Unigene0001014;Unigene0001338;Unigene0001673;Unigene0001708;Unigene0001795;Unigene0001804;Unigene0001817;Unigene0001843;Unigene0002044;Unigene0002437;Unigene0002482;Unigene0002819;Unigene0002880;Unigene0002917;Unigene0003637;Unigene0003755;Unigene00…
M1+M6	Biological Process	GO:0007270	neuron-neuron synaptic transmission	22	2.00608e-09	1.94913e-07	Unigene0001708;Unigene0002819;Unigene0005066;Unigene0006024;Unigene0006625;Unigene0007779;Unigene0009034;Unigene0022054;Unigene0024040;Unigene0030980;Unigene0036738;Unigene0037263;Unigene0037266;Unigene0039317;Unigene0040652;Unigene0040837;Unigene0043164;Unigene0044139;Unigene0045581;Unigene0045718;Unigene0047384;Unigene0047815
M1+M6	Biological Process	GO:0044700	single organism signaling	382	2.17891e-09	2.0509e-07	Unigene0000100;Unigene0000137;Unigene0000252;Unigene0000280;Unigene0000507;Unigene0000526;Unigene0000627;Unigene0000681;Unigene0000710;Unigene0000990;Unigene0001014;Unigene0001338;Unigene0001673;Unigene0001708;Unigene0001795;Unigene0001804;Unigene0001817;Unigene0001843;Unigene0002044;Unigene0002437;Unigene0002482;Unigene0002819;Unigene0002880;Unigene0002917;Unigene0003637;Unigene0003755;Unigene00…
M1+M6	Biological Process	GO:0023052	signaling	382	2.35598e-09	2.1324e-07	Unigene0000100;Unigene0000137;Unigene0000252;Unigene0000280;Unigene0000507;Unigene0000526;Unigene0000627;Unigene0000681;Unigene0000710;Unigene0000990;Unigene0001014;Unigene0001338;Unigene0001673;Unigene0001708;Unigene0001795;Unigene0001804;Unigene0001817;Unigene0001843;Unigene0002044;Unigene0002437;Unigene0002482;Unigene0002819;Unigene0002880;Unigene0002917;Unigene0003637;Unigene0003755;Unigene00…
M1+M6	Biological Process	GO:0050806	positive regulation of synaptic transmission	11	2.4071e-09	2.1324e-07	Unigene0000280;Unigene0002819;Unigene0030265;Unigene0030267;Unigene0030297;Unigene0035516;Unigene0043164;Unigene0044139;Unigene0045081;Unigene0050820;Unigene0052202
M1+M6	Biological Process	GO:0048667	cell morphogenesis involved in neuron differentiation	33	2.60708e-09	2.24358e-07	Unigene0002323;Unigene0004772;Unigene0005643;Unigene0007779;Unigene0014604;Unigene0015559;Unigene0020013;Unigene0025555;Unigene0025938;Unigene0028507;Unigene0030265;Unigene0030267;Unigene0030297;Unigene0031714;Unigene0033905;Unigene0034471;Unigene0035516;Unigene0036553;Unigene0036557;Unigene0038613;Unigene0039317;Unigene0041584;Unigene0043128;Unigene0043132;Unigene0043375;Unigene0044321;Unigene00…
M1+M6	Biological Process	GO:0051049	regulation of transport	115	7.86751e-09	6.58249e-07	Unigene0000280;Unigene0000507;Unigene0000990;Unigene0001804;Unigene0002819;Unigene0003411;Unigene0005239;Unigene0005273;Unigene0005277;Unigene0005467;Unigene0005559;Unigene0006058;Unigene0006096;Unigene0006716;Unigene0006971;Unigene0007779;Unigene0022598;Unigene0022976;Unigene0025843;Unigene0027949;Unigene0028102;Unigene0028524;Unigene0029621;Unigene0030265;Unigene0030267;Unigene0030297;Unigene00…
M1+M6	Biological Process	GO:0008344	adult locomotory behavior	16	1.00925e-08	8.21586e-07	Unigene0000627;Unigene0002437;Unigene0004655;Unigene0006089;Unigene0010756;Unigene0012599;Unigene0020013;Unigene0021374;Unigene0021641;Unigene0030674;Unigene0036341;Unigene0039777;Unigene0043128;Unigene0043132;Unigene0044051;Unigene0048373
M1+M6	Biological Process	GO:0006812	cation transport	100	2.21704e-08	1.7573e-06	Unigene0000310;Unigene0000507;Unigene0000990;Unigene0002803;Unigene0002905;Unigene0002956;Unigene0004722;Unigene0005277;Unigene0005460;Unigene0005586;Unigene0005616;Unigene0006024;Unigene0006096;Unigene0006551;Unigene0006716;Unigene0006920;Unigene0006971;Unigene0007364;Unigene0007779;Unigene0021641;Unigene0022976;Unigene0023917;Unigene0025843;Unigene0027949;Unigene0027995;Unigene0028102;Unigene00…
M1+M6	Biological Process	GO:0048168	regulation of neuronal synaptic plasticity	13	3.56449e-08	2.75288e-06	Unigene0003755;Unigene0005885;Unigene0007228;Unigene0029807;Unigene0030040;Unigene0030265;Unigene0030267;Unigene0030297;Unigene0039777;Unigene0040837;Unigene0043375;Unigene0044642;Unigene0047815
M1+M6	Biological Process	GO:0051703	intraspecies interaction between organisms	19	3.72918e-08	2.80807e-06	Unigene0004512;Unigene0006024;Unigene0006303;Unigene0007779;Unigene0029807;Unigene0030265;Unigene0030267;Unigene0030297;Unigene0035516;Unigene0039602;Unigene0040404;Unigene0040837;Unigene0042156;Unigene0044255;Unigene0045081;Unigene0045831;Unigene0047384;Unigene0049988;Unigene0052239
M1+M6	Biological Process	GO:0032989	cellular component morphogenesis	124	4.59204e-08	3.37347e-06	Unigene0000280;Unigene0000507;Unigene0000627;Unigene0001071;Unigene0001963;Unigene0002323;Unigene0002345;Unigene0002428;Unigene0002437;Unigene0003810;Unigene0004236;Unigene0004760;Unigene0004772;Unigene0004916;Unigene0005046;Unigene0005281;Unigene0005390;Unigene0005559;Unigene0005586;Unigene0005643;Unigene0005954;Unigene0006303;Unigene0007779;Unigene0008584;Unigene0009004;Unigene0009080;Unigene00…
M1+M6	Biological Process	GO:0034220	ion transmembrane transport	57	6.85125e-08	4.91333e-06	Unigene0000280;Unigene0001302;Unigene0004722;Unigene0005239;Unigene0005273;Unigene0005277;Unigene0006971;Unigene0007364;Unigene0021641;Unigene0022976;Unigene0025843;Unigene0027949;Unigene0027995;Unigene0028102;Unigene0028322;Unigene0030265;Unigene0030267;Unigene0030297;Unigene0031166;Unigene0032087;Unigene0033075;Unigene0033726;Unigene0035405;Unigene0035516;Unigene0036092;Unigene0036303;Unigene00…
M1+M6	Biological Process	GO:0007417	central nervous system development	69	1.11109e-07	7.78282e-06	Unigene0000280;Unigene0001862;Unigene0004772;Unigene0005123;Unigene0005643;Unigene0006024;Unigene0007779;Unigene0008025;Unigene0008027;Unigene0011918;Unigene0012599;Unigene0012646;Unigene0014604;Unigene0015559;Unigene0020013;Unigene0022483;Unigene0025554;Unigene0025555;Unigene0025938;Unigene0028507;Unigene0029371;Unigene0029621;Unigene0030265;Unigene0030267;Unigene0030297;Unigene0030794;Unigene00…
M1+M6	Biological Process	GO:0055085	transmembrane transport	59	1.55576e-07	1.06499e-05	Unigene0000280;Unigene0001302;Unigene0004722;Unigene0005239;Unigene0005273;Unigene0005277;Unigene0006971;Unigene0007364;Unigene0021641;Unigene0022976;Unigene0025843;Unigene0027949;Unigene0027995;Unigene0028102;Unigene0028322;Unigene0030265;Unigene0030267;Unigene0030297;Unigene0031166;Unigene0031712;Unigene0032005;Unigene0032087;Unigene0033075;Unigene0033726;Unigene0035405;Unigene0035516;Unigene00…
M1+M6	Biological Process	GO:0007612	learning	12	2.12979e-07	1.42554e-05	Unigene0000280;Unigene0004293;Unigene0006096;Unigene0006716;Unigene0007779;Unigene0033125;Unigene0039317;Unigene0040837;Unigene0042156;Unigene0044558;Unigene0047384;Unigene0052202
M1+M6	Biological Process	GO:0051960	regulation of nervous system development	49	2.34351e-07	1.53449e-05	Unigene0000239;Unigene0000280;Unigene0001414;Unigene0001795;Unigene0002428;Unigene0004728;Unigene0005643;Unigene0006024;Unigene0007269;Unigene0008647;Unigene0009080;Unigene0011918;Unigene0012599;Unigene0022483;Unigene0028102;Unigene0029184;Unigene0029371;Unigene0029621;Unigene0030265;Unigene0030267;Unigene0030297;Unigene0030794;Unigene0031208;Unigene0031969;Unigene0032441;Unigene0034569;Unigene00…
M1+M6	Biological Process	GO:0043269	regulation of ion transport	45	3.06687e-07	1.96541e-05	Unigene0000280;Unigene0000990;Unigene0005239;Unigene0005273;Unigene0006096;Unigene0006971;Unigene0007779;Unigene0022598;Unigene0022976;Unigene0025843;Unigene0027949;Unigene0028102;Unigene0028524;Unigene0030265;Unigene0030267;Unigene0030297;Unigene0033055;Unigene0035516;Unigene0036303;Unigene0036858;Unigene0037263;Unigene0037266;Unigene0037485;Unigene0038613;Unigene0039793;Unigene0040076;Unigene00…
M1+M6	Biological Process	GO:0061564	axon development	28	3.7446e-07	2.34974e-05	Unigene0002323;Unigene0004772;Unigene0005643;Unigene0007779;Unigene0014604;Unigene0015559;Unigene0020013;Unigene0025555;Unigene0025938;Unigene0028507;Unigene0031714;Unigene0033905;Unigene0034471;Unigene0036553;Unigene0036557;Unigene0038300;Unigene0038613;Unigene0039317;Unigene0041584;Unigene0043128;Unigene0043132;Unigene0043375;Unigene0045842;Unigene0047384;Unigene0050354;Unigene0052202;Unigene00…
M1+M6	Biological Process	GO:0007625	grooming behavior	6	4.71564e-07	2.89868e-05	Unigene0029807;Unigene0030265;Unigene0030267;Unigene0030297;Unigene0045081;Unigene0045718
M1+M6	Biological Process	GO:0021953	central nervous system neuron differentiation	24	5.99944e-07	3.61406e-05	Unigene0004772;Unigene0007779;Unigene0014604;Unigene0015559;Unigene0020013;Unigene0022483;Unigene0025554;Unigene0025938;Unigene0028507;Unigene0029371;Unigene0029621;Unigene0030265;Unigene0030267;Unigene0030297;Unigene0031714;Unigene0043128;Unigene0043132;Unigene0043375;Unigene0045842;Unigene0047384;Unigene0050354;Unigene0052465;Unigene0053537;Unigene0069345
M1+M6	Biological Process	GO:0042391	regulation of membrane potential	32	6.81247e-07	4.02337e-05	Unigene0000280;Unigene0000507;Unigene0002641;Unigene0007779;Unigene0007963;Unigene0021641;Unigene0022976;Unigene0028102;Unigene0030265;Unigene0030267;Unigene0030297;Unigene0030980;Unigene0032792;Unigene0033726;Unigene0035516;Unigene0037263;Unigene0037266;Unigene0038613;Unigene0039317;Unigene0039777;Unigene0040260;Unigene0040594;Unigene0040837;Unigene0042156;Unigene0045081;Unigene0047384;Unigene00…
M1+M6	Biological Process	GO:0007409	axonogenesis	27	7.37718e-07	4.27309e-05	Unigene0002323;Unigene0004772;Unigene0005643;Unigene0007779;Unigene0014604;Unigene0015559;Unigene0020013;Unigene0025555;Unigene0025938;Unigene0028507;Unigene0031714;Unigene0033905;Unigene0034471;Unigene0036553;Unigene0036557;Unigene0038613;Unigene0039317;Unigene0041584;Unigene0043128;Unigene0043132;Unigene0043375;Unigene0045842;Unigene0047384;Unigene0050354;Unigene0052202;Unigene0052624;Unigene00…
M1+M6	Biological Process	GO:0021955	central nervous system neuron axonogenesis	13	8.5316e-07	4.84853e-05	Unigene0004772;Unigene0007779;Unigene0014604;Unigene0015559;Unigene0020013;Unigene0028507;Unigene0031714;Unigene0043128;Unigene0043132;Unigene0043375;Unigene0045842;Unigene0047384;Unigene0050354
M1+M6	Biological Process	GO:0033555	multicellular organismal response to stress	12	1.06513e-06	5.94103e-05	Unigene0000280;Unigene0014604;Unigene0024532;Unigene0030265;Unigene0030267;Unigene0030297;Unigene0035001;Unigene0036303;Unigene0039793;Unigene0042337;Unigene0043962;Unigene0049742
M1+M6	Biological Process	GO:0050767	regulation of neurogenesis	44	1.14377e-06	6.26372e-05	Unigene0000239;Unigene0000280;Unigene0001414;Unigene0001795;Unigene0004728;Unigene0005643;Unigene0007269;Unigene0008647;Unigene0009080;Unigene0022483;Unigene0028102;Unigene0029184;Unigene0029371;Unigene0029621;Unigene0030265;Unigene0030267;Unigene0030297;Unigene0030794;Unigene0031208;Unigene0031969;Unigene0032441;Unigene0034569;Unigene0035516;Unigene0035971;Unigene0036341;Unigene0036553;Unigene00…
M1+M6	Biological Process	GO:0032501	multicellular organismal process	428	1.20237e-06	6.46703e-05	Unigene0000007;Unigene0000100;Unigene0000137;Unigene0000221;Unigene0000239;Unigene0000252;Unigene0000280;Unigene0000310;Unigene0000507;Unigene0000627;Unigene0000648;Unigene0000710;Unigene0000865;Unigene0000990;Unigene0001071;Unigene0001414;Unigene0001795;Unigene0001843;Unigene0001862;Unigene0002087;Unigene0002323;Unigene0002345;Unigene0002428;Unigene0002437;Unigene0002641;Unigene0002803;Unigene00…
M1+M6	Biological Process	GO:0060627	regulation of vesicle-mediated transport	32	1.52141e-06	8.03946e-05	Unigene0001804;Unigene0002819;Unigene0005277;Unigene0006058;Unigene0030852;Unigene0036553;Unigene0036557;Unigene0036842;Unigene0036941;Unigene0037536;Unigene0037805;Unigene0038181;Unigene0039317;Unigene0039797;Unigene0040479;Unigene0042041;Unigene0043386;Unigene0044139;Unigene0044311;Unigene0044633;Unigene0045581;Unigene0046113;Unigene0046749;Unigene0046825;Unigene0047110;Unigene0047124;Unigene00…
M1+M6	Biological Process	GO:0003008	system process	127	1.96655e-06	0.000102125	Unigene0000007;Unigene0000280;Unigene0000507;Unigene0000627;Unigene0000865;Unigene0000990;Unigene0001414;Unigene0001862;Unigene0002641;Unigene0002803;Unigene0002819;Unigene0002956;Unigene0003414;Unigene0003903;Unigene0004293;Unigene0004512;Unigene0005046;Unigene0005390;Unigene0006024;Unigene0006096;Unigene0006121;Unigene0006303;Unigene0006551;Unigene0006716;Unigene0007779;Unigene0008989;Unigene00…
M1+M6	Biological Process	GO:0048731	system development	276	2.19161e-06	0.000111883	Unigene0000100;Unigene0000137;Unigene0000239;Unigene0000280;Unigene0000627;Unigene0000648;Unigene0000710;Unigene0000865;Unigene0000990;Unigene0001071;Unigene0001414;Unigene0001795;Unigene0001843;Unigene0001862;Unigene0002087;Unigene0002323;Unigene0002345;Unigene0002428;Unigene0002437;Unigene0003707;Unigene0003903;Unigene0004236;Unigene0004293;Unigene0004554;Unigene0004728;Unigene0004772;Unigene00…
M1+M6	Biological Process	GO:0031344	regulation of cell projection organization	42	3.07402e-06	0.000154316	Unigene0000239;Unigene0000280;Unigene0001414;Unigene0001795;Unigene0004728;Unigene0005277;Unigene0005586;Unigene0008647;Unigene0022598;Unigene0023577;Unigene0027316;Unigene0029184;Unigene0029621;Unigene0030040;Unigene0030265;Unigene0030267;Unigene0030297;Unigene0030363;Unigene0032441;Unigene0034373;Unigene0034509;Unigene0034569;Unigene0035516;Unigene0035518;Unigene0035971;Unigene0036553;Unigene00…
M1+M6	Biological Process	GO:0051179	localization	414	3.18009e-06	0.000157023	Unigene0000100;Unigene0000280;Unigene0000310;Unigene0000507;Unigene0000526;Unigene0000627;Unigene0000701;Unigene0000865;Unigene0000941;Unigene0000990;Unigene0001014;Unigene0001302;Unigene0001414;Unigene0001804;Unigene0001862;Unigene0001963;Unigene0001997;Unigene0002044;Unigene0002158;Unigene0002323;Unigene0002345;Unigene0002803;Unigene0002819;Unigene0002905;Unigene0002956;Unigene0003261;Unigene00…
M1+M6	Biological Process	GO:0044707	single-multicellular organism process	379	3.26844e-06	0.000158783	Unigene0000007;Unigene0000100;Unigene0000137;Unigene0000221;Unigene0000239;Unigene0000252;Unigene0000280;Unigene0000310;Unigene0000507;Unigene0000627;Unigene0000648;Unigene0000710;Unigene0000865;Unigene0000990;Unigene0001071;Unigene0001414;Unigene0001795;Unigene0001843;Unigene0001862;Unigene0002087;Unigene0002323;Unigene0002345;Unigene0002428;Unigene0002437;Unigene0002641;Unigene0002917;Unigene00…
M1+M6	Biological Process	GO:0030154	cell differentiation	249	3.76093e-06	0.000179808	Unigene0000100;Unigene0000137;Unigene0000239;Unigene0000252;Unigene0000280;Unigene0000507;Unigene0000526;Unigene0000627;Unigene0000648;Unigene0000710;Unigene0000865;Unigene0001071;Unigene0001414;Unigene0001795;Unigene0001817;Unigene0002323;Unigene0002345;Unigene0002428;Unigene0002437;Unigene0003707;Unigene0004236;Unigene0004293;Unigene0004554;Unigene0004599;Unigene0004728;Unigene0004750;Unigene00…
M1+M6	Biological Process	GO:0017156	calcium ion regulated exocytosis	10	3.98799e-06	0.000184797	Unigene0001804;Unigene0004844;Unigene0030363;Unigene0030852;Unigene0039317;Unigene0044311;Unigene0045581;Unigene0046825;Unigene0049261;Unigene0068258
M1+M6	Biological Process	GO:0045055	regulated exocytosis	10	3.98799e-06	0.000184797	Unigene0001804;Unigene0004844;Unigene0030363;Unigene0030852;Unigene0039317;Unigene0044311;Unigene0045581;Unigene0046825;Unigene0049261;Unigene0068258
M1+M6	Biological Process	GO:0048169	regulation of long-term neuronal synaptic plasticity	5	5.35602e-06	0.000244429	Unigene0030040;Unigene0030265;Unigene0030267;Unigene0030297;Unigene0043375
M1+M6	Biological Process	GO:1902578	single-organism localization	250	5.50648e-06	0.000247545	Unigene0000280;Unigene0000310;Unigene0000507;Unigene0000627;Unigene0000701;Unigene0000990;Unigene0001302;Unigene0001804;Unigene0001997;Unigene0002044;Unigene0002158;Unigene0002323;Unigene0002803;Unigene0002819;Unigene0002905;Unigene0002956;Unigene0003261;Unigene0003348;Unigene0003401;Unigene0003411;Unigene0003777;Unigene0004722;Unigene0004844;Unigene0005066;Unigene0005239;Unigene0005273;Unigene00…
M1+M6	Biological Process	GO:0050808	synapse organization	17	6.53108e-06	0.000289288	Unigene0000280;Unigene0006311;Unigene0012646;Unigene0022598;Unigene0030265;Unigene0030267;Unigene0030297;Unigene0035021;Unigene0035516;Unigene0036738;Unigene0038719;Unigene0040404;Unigene0044642;Unigene0045081;Unigene0047815;Unigene0049397;Unigene0052119
M1+M6	Biological Process	GO:0007613	memory	10	6.73298e-06	0.000293909	Unigene0000280;Unigene0006096;Unigene0030980;Unigene0033840;Unigene0035807;Unigene0040837;Unigene0042156;Unigene0049477;Unigene0051878;Unigene0052470
M1+M6	Biological Process	GO:0042551	neuron maturation	9	7.44449e-06	0.000320326	Unigene0020013;Unigene0029680;Unigene0033196;Unigene0039394;Unigene0039523;Unigene0042337;Unigene0043128;Unigene0043132;Unigene0052239
M1+M6	Biological Process	GO:0032879	regulation of localization	139	8.54626e-06	0.000362554	Unigene0000280;Unigene0000507;Unigene0000990;Unigene0001014;Unigene0001414;Unigene0001804;Unigene0002819;Unigene0003411;Unigene0003414;Unigene0005239;Unigene0005273;Unigene0005277;Unigene0005460;Unigene0005467;Unigene0005559;Unigene0005643;Unigene0006058;Unigene0006096;Unigene0006349;Unigene0006716;Unigene0006971;Unigene0007779;Unigene0008647;Unigene0022598;Unigene0022976;Unigene0025843;Unigene00…
M1+M6	Biological Process	GO:0048869	cellular developmental process	273	1.10306e-05	0.000461448	Unigene0000100;Unigene0000137;Unigene0000239;Unigene0000252;Unigene0000280;Unigene0000507;Unigene0000526;Unigene0000627;Unigene0000648;Unigene0000710;Unigene0000865;Unigene0001071;Unigene0001414;Unigene0001795;Unigene0001817;Unigene0001963;Unigene0002323;Unigene0002345;Unigene0002428;Unigene0002437;Unigene0003707;Unigene0003810;Unigene0004236;Unigene0004293;Unigene0004554;Unigene0004599;Unigene00…
M1+M6	Biological Process	GO:0044765	single-organism transport	238	1.45147e-05	0.000598879	Unigene0000280;Unigene0000310;Unigene0000507;Unigene0000627;Unigene0000701;Unigene0000990;Unigene0001302;Unigene0001804;Unigene0001997;Unigene0002044;Unigene0002158;Unigene0002323;Unigene0002803;Unigene0002819;Unigene0002905;Unigene0002956;Unigene0003261;Unigene0003401;Unigene0003411;Unigene0003777;Unigene0004722;Unigene0004844;Unigene0005066;Unigene0005239;Unigene0005273;Unigene0005277;Unigene00…
M1+M6	Biological Process	GO:0060284	regulation of cell development	64	1.74227e-05	0.00070915	Unigene0000239;Unigene0000280;Unigene0000507;Unigene0001414;Unigene0001795;Unigene0003707;Unigene0004728;Unigene0005643;Unigene0007269;Unigene0007779;Unigene0007963;Unigene0008647;Unigene0009080;Unigene0011918;Unigene0020272;Unigene0022483;Unigene0028102;Unigene0029184;Unigene0029371;Unigene0029548;Unigene0029621;Unigene0030265;Unigene0030267;Unigene0030282;Unigene0030297;Unigene0030794;Unigene00…
M1+M6	Biological Process	GO:0007275	multicellular organism development	291	2.07297e-05	0.000832503	Unigene0000100;Unigene0000137;Unigene0000221;Unigene0000239;Unigene0000280;Unigene0000627;Unigene0000648;Unigene0000710;Unigene0000865;Unigene0000990;Unigene0001071;Unigene0001414;Unigene0001795;Unigene0001843;Unigene0001862;Unigene0002087;Unigene0002323;Unigene0002345;Unigene0002428;Unigene0002437;Unigene0003707;Unigene0003903;Unigene0004236;Unigene0004293;Unigene0004530;Unigene0004554;Unigene00…
M1+M6	Biological Process	GO:0097485	neuron projection guidance	41	2.17591e-05	0.000854529	Unigene0000280;Unigene0002345;Unigene0002437;Unigene0004236;Unigene0004772;Unigene0004916;Unigene0005390;Unigene0005643;Unigene0006303;Unigene0008584;Unigene0009004;Unigene0012776;Unigene0025555;Unigene0025938;Unigene0027316;Unigene0029621;Unigene0029825;Unigene0030288;Unigene0031714;Unigene0033196;Unigene0033905;Unigene0034471;Unigene0036553;Unigene0036557;Unigene0038162;Unigene0038613;Unigene00…
M1+M6	Biological Process	GO:0008038	neuron recognition	9	2.18455e-05	0.000854529	Unigene0002437;Unigene0005046;Unigene0008027;Unigene0021374;Unigene0027316;Unigene0037587;Unigene0039330;Unigene0043375;Unigene0044321
M1+M6	Biological Process	GO:0007420	brain development	40	2.40787e-05	0.00091804	Unigene0000280;Unigene0001862;Unigene0004772;Unigene0006024;Unigene0008025;Unigene0008027;Unigene0011918;Unigene0012599;Unigene0014604;Unigene0022483;Unigene0025554;Unigene0025555;Unigene0029371;Unigene0029621;Unigene0030265;Unigene0030267;Unigene0030297;Unigene0030794;Unigene0030852;Unigene0031822;Unigene0035021;Unigene0035357;Unigene0036341;Unigene0037311;Unigene0039317;Unigene0039653;Unigene00…
M1+M6	Biological Process	GO:0060322	head development	40	2.40787e-05	0.00091804	Unigene0000280;Unigene0001862;Unigene0004772;Unigene0006024;Unigene0008025;Unigene0008027;Unigene0011918;Unigene0012599;Unigene0014604;Unigene0022483;Unigene0025554;Unigene0025555;Unigene0029371;Unigene0029621;Unigene0030265;Unigene0030267;Unigene0030297;Unigene0030794;Unigene0030852;Unigene0031822;Unigene0035021;Unigene0035357;Unigene0036341;Unigene0037311;Unigene0039317;Unigene0039653;Unigene00…
M1+M6	Biological Process	GO:0000904	cell morphogenesis involved in differentiation	55	2.44517e-05	0.000920607	Unigene0000507;Unigene0002323;Unigene0004772;Unigene0005643;Unigene0007779;Unigene0011918;Unigene0014604;Unigene0015559;Unigene0020013;Unigene0020272;Unigene0025555;Unigene0025938;Unigene0028102;Unigene0028507;Unigene0029371;Unigene0029548;Unigene0030265;Unigene0030267;Unigene0030282;Unigene0030297;Unigene0030674;Unigene0031580;Unigene0031714;Unigene0033905;Unigene0034373;Unigene0034471;Unigene00…
M1+M6	Biological Process	GO:0021700	developmental maturation	25	2.5674e-05	0.000952331	Unigene0008656;Unigene0012599;Unigene0014604;Unigene0020013;Unigene0022483;Unigene0029680;Unigene0030852;Unigene0032344;Unigene0033196;Unigene0035802;Unigene0036553;Unigene0036557;Unigene0039394;Unigene0039523;Unigene0040837;Unigene0042156;Unigene0042337;Unigene0043128;Unigene0043132;Unigene0044217;Unigene0044321;Unigene0049742;Unigene0052239;Unigene0054861;Unigene0068258
M1+M6	Biological Process	GO:0065008	regulation of biological quality	211	2.59267e-05	0.000952331	Unigene0000077;Unigene0000137;Unigene0000252;Unigene0000280;Unigene0000310;Unigene0000507;Unigene0000648;Unigene0001414;Unigene0001754;Unigene0001804;Unigene0002044;Unigene0002068;Unigene0002323;Unigene0002641;Unigene0002803;Unigene0003401;Unigene0003698;Unigene0003755;Unigene0003934;Unigene0004293;Unigene0004512;Unigene0004519;Unigene0005046;Unigene0005247;Unigene0005273;Unigene0005460;Unigene00…
M1+M6	Biological Process	GO:0043113	receptor clustering	9	3.52387e-05	0.00127878	Unigene0000280;Unigene0006311;Unigene0022598;Unigene0030265;Unigene0030267;Unigene0030297;Unigene0037423;Unigene0040404;Unigene0045081
M1+M6	Biological Process	GO:0098742	cell-cell adhesion via plasma-membrane adhesion molecules	27	4.30297e-05	0.00154292	Unigene0005549;Unigene0006602;Unigene0008241;Unigene0009034;Unigene0018329;Unigene0022054;Unigene0027652;Unigene0030662;Unigene0036062;Unigene0036341;Unigene0036795;Unigene0036981;Unigene0037311;Unigene0038162;Unigene0039330;Unigene0040816;Unigene0042969;Unigene0043517;Unigene0046869;Unigene0047893;Unigene0048749;Unigene0049742;Unigene0051030;Unigene0051862;Unigene0051926;Unigene0051973;Unigene00…
M1+M6	Biological Process	GO:0007215	glutamate receptor signaling pathway	7	4.41116e-05	0.00156311	Unigene0037263;Unigene0037266;Unigene0040837;Unigene0041430;Unigene0044321;Unigene0044643;Unigene0051334
M1+M6	Biological Process	GO:0044763	single-organism cellular process	771	4.81858e-05	0.0016749	Unigene0000100;Unigene0000137;Unigene0000239;Unigene0000252;Unigene0000280;Unigene0000339;Unigene0000507;Unigene0000526;Unigene0000549;Unigene0000627;Unigene0000648;Unigene0000681;Unigene0000701;Unigene0000710;Unigene0000854;Unigene0000865;Unigene0000990;Unigene0001014;Unigene0001071;Unigene0001302;Unigene0001338;Unigene0001414;Unigene0001515;Unigene0001673;Unigene0001708;Unigene0001754;Unigene00…
M1+M6	Biological Process	GO:0006814	sodium ion transport	23	4.83787e-05	0.0016749	Unigene0000990;Unigene0005616;Unigene0006716;Unigene0006920;Unigene0021641;Unigene0022976;Unigene0027949;Unigene0028102;Unigene0030980;Unigene0031166;Unigene0035775;Unigene0038613;Unigene0042438;Unigene0043128;Unigene0043482;Unigene0043489;Unigene0045597;Unigene0050884;Unigene0051334;Unigene0051337;Unigene0051496;Unigene0051497;Unigene0051676
M1+M6	Biological Process	GO:0070838	divalent metal ion transport	43	5.58674e-05	0.0018907	Unigene0000507;Unigene0002803;Unigene0005277;Unigene0005460;Unigene0005586;Unigene0006096;Unigene0006551;Unigene0006716;Unigene0006920;Unigene0006971;Unigene0007779;Unigene0025843;Unigene0031642;Unigene0033075;Unigene0033726;Unigene0034743;Unigene0035775;Unigene0036092;Unigene0036303;Unigene0036858;Unigene0039793;Unigene0040260;Unigene0040837;Unigene0043489;Unigene0043962;Unigene0044642;Unigene00…
M1+M6	Biological Process	GO:0072511	divalent inorganic cation transport	43	5.58674e-05	0.0018907	Unigene0000507;Unigene0002803;Unigene0005277;Unigene0005460;Unigene0005586;Unigene0006096;Unigene0006551;Unigene0006716;Unigene0006920;Unigene0006971;Unigene0007779;Unigene0025843;Unigene0031642;Unigene0033075;Unigene0033726;Unigene0034743;Unigene0035775;Unigene0036092;Unigene0036303;Unigene0036858;Unigene0039793;Unigene0040260;Unigene0040837;Unigene0043489;Unigene0043962;Unigene0044642;Unigene00…
M1+M6	Biological Process	GO:0051899	membrane depolarization	12	6.63145e-05	0.00219839	Unigene0000507;Unigene0022976;Unigene0028102;Unigene0030980;Unigene0035516;Unigene0037263;Unigene0037266;Unigene0038613;Unigene0039317;Unigene0040837;Unigene0050884;Unigene0051337
M1+M6	Biological Process	GO:0032412	regulation of ion transmembrane transporter activity	22	6.64189e-05	0.00219839	Unigene0000280;Unigene0006971;Unigene0022976;Unigene0025843;Unigene0028102;Unigene0030265;Unigene0030267;Unigene0030297;Unigene0035516;Unigene0036303;Unigene0038613;Unigene0040076;Unigene0040260;Unigene0040594;Unigene0043489;Unigene0048008;Unigene0049012;Unigene0049013;Unigene0049015;Unigene0050884;Unigene0051337;Unigene0052657
M1+M6	Biological Process	GO:0021954	central nervous system neuron development	13	7.22753e-05	0.00236623	Unigene0004772;Unigene0007779;Unigene0014604;Unigene0015559;Unigene0020013;Unigene0028507;Unigene0031714;Unigene0043128;Unigene0043132;Unigene0043375;Unigene0045842;Unigene0047384;Unigene0050354
M1+M6	Biological Process	GO:0022898	regulation of transmembrane transporter activity	22	7.75356e-05	0.0024793	Unigene0000280;Unigene0006971;Unigene0022976;Unigene0025843;Unigene0028102;Unigene0030265;Unigene0030267;Unigene0030297;Unigene0035516;Unigene0036303;Unigene0038613;Unigene0040076;Unigene0040260;Unigene0040594;Unigene0043489;Unigene0048008;Unigene0049012;Unigene0049013;Unigene0049015;Unigene0050884;Unigene0051337;Unigene0052657
M1+M6	Biological Process	GO:0050905	neuromuscular process	17	7.75795e-05	0.0024793	Unigene0021641;Unigene0027284;Unigene0029807;Unigene0030265;Unigene0030267;Unigene0030297;Unigene0030674;Unigene0035193;Unigene0038300;Unigene0039296;Unigene0042156;Unigene0044642;Unigene0045081;Unigene0045652;Unigene0047114;Unigene0048008;Unigene0052202
M1+M6	Biological Process	GO:0017158	regulation of calcium ion-dependent exocytosis	7	8.14909e-05	0.0024793	Unigene0001804;Unigene0030852;Unigene0039317;Unigene0044311;Unigene0045581;Unigene0046825;Unigene0068258
M1+M6	Biological Process	GO:0045838	positive regulation of membrane potential	7	8.14909e-05	0.0024793	Unigene0000280;Unigene0030265;Unigene0030267;Unigene0030297;Unigene0035516;Unigene0042156;Unigene0045081
M1+M6	Biological Process	GO:0048813	dendrite morphogenesis	7	8.14909e-05	0.0024793	Unigene0030265;Unigene0030267;Unigene0030297;Unigene0035516;Unigene0039317;Unigene0044321;Unigene0046834
M1+M6	Biological Process	GO:0048814	regulation of dendrite morphogenesis	7	8.14909e-05	0.0024793	Unigene0030265;Unigene0030267;Unigene0030297;Unigene0035516;Unigene0039317;Unigene0044321;Unigene0046834
M1+M6	Biological Process	GO:1903305	regulation of regulated secretory pathway	7	8.14909e-05	0.0024793	Unigene0001804;Unigene0030852;Unigene0039317;Unigene0044311;Unigene0045581;Unigene0046825;Unigene0068258
M1+M6	Biological Process	GO:0045664	regulation of neuron differentiation	30	9.51707e-05	0.00286654	Unigene0000239;Unigene0000280;Unigene0001414;Unigene0001795;Unigene0004728;Unigene0008647;Unigene0022483;Unigene0029184;Unigene0030265;Unigene0030267;Unigene0030297;Unigene0032441;Unigene0034569;Unigene0035516;Unigene0035971;Unigene0036553;Unigene0036557;Unigene0038613;Unigene0039317;Unigene0039523;Unigene0040479;Unigene0042337;Unigene0044321;Unigene0044642;Unigene0045597;Unigene0046834;Unigene00…
M1+M6	Biological Process	GO:0010646	regulation of cell communication	189	9.84229e-05	0.00293515	Unigene0000252;Unigene0000280;Unigene0000507;Unigene0000627;Unigene0000681;Unigene0001014;Unigene0001338;Unigene0001673;Unigene0001708;Unigene0001795;Unigene0001817;Unigene0001843;Unigene0002819;Unigene0002917;Unigene0003637;Unigene0003755;Unigene0003934;Unigene0004236;Unigene0004293;Unigene0004512;Unigene0004519;Unigene0004750;Unigene0005247;Unigene0005277;Unigene0005460;Unigene0005467;Unigene00…
M1+M6	Biological Process	GO:0006816	calcium ion transport	33	0.0001117	0.00329844	Unigene0005277;Unigene0005460;Unigene0005586;Unigene0006096;Unigene0006551;Unigene0006716;Unigene0006971;Unigene0025843;Unigene0031642;Unigene0033075;Unigene0033726;Unigene0034743;Unigene0035775;Unigene0036092;Unigene0036303;Unigene0036858;Unigene0039793;Unigene0040260;Unigene0040837;Unigene0043962;Unigene0044643;Unigene0048008;Unigene0049012;Unigene0049013;Unigene0049015;Unigene0049029;Unigene00…
M1+M6	Biological Process	GO:0050773	regulation of dendrite development	8	0.000113256	0.0033119	Unigene0030265;Unigene0030267;Unigene0030297;Unigene0035516;Unigene0039317;Unigene0044321;Unigene0044642;Unigene0046834
M1+M6	Biological Process	GO:0051234	establishment of localization	319	0.00012118	0.00350957	Unigene0000100;Unigene0000280;Unigene0000310;Unigene0000507;Unigene0000627;Unigene0000701;Unigene0000941;Unigene0000990;Unigene0001302;Unigene0001414;Unigene0001804;Unigene0001997;Unigene0002044;Unigene0002158;Unigene0002323;Unigene0002803;Unigene0002819;Unigene0002905;Unigene0002956;Unigene0003261;Unigene0003348;Unigene0003401;Unigene0003411;Unigene0003755;Unigene0003777;Unigene0004393;Unigene00…
M1+M6	Biological Process	GO:0010469	regulation of receptor activity	16	0.00012653	0.0036296	Unigene0000280;Unigene0000681;Unigene0006052;Unigene0006625;Unigene0030040;Unigene0033075;Unigene0033726;Unigene0035516;Unigene0036092;Unigene0039317;Unigene0040260;Unigene0042156;Unigene0049477;Unigene0051653;Unigene0052119;Unigene0052657
M1+M6	Biological Process	GO:0010975	regulation of neuron projection development	28	0.000141964	0.00403392	Unigene0000239;Unigene0000280;Unigene0001414;Unigene0001795;Unigene0004728;Unigene0008647;Unigene0029184;Unigene0030265;Unigene0030267;Unigene0030297;Unigene0032441;Unigene0034569;Unigene0035516;Unigene0035971;Unigene0036553;Unigene0036557;Unigene0038613;Unigene0039317;Unigene0039523;Unigene0040479;Unigene0044321;Unigene0044642;Unigene0045597;Unigene0046834;Unigene0047209;Unigene0049549;Unigene00…
M1+M6	Biological Process	GO:0007638	mechanosensory behavior	6	0.000147411	0.00411112	Unigene0030265;Unigene0030267;Unigene0030297;Unigene0040404;Unigene0045081;Unigene0045652
M1+M6	Biological Process	GO:0072578	neurotransmitter-gated ion channel clustering	6	0.000147411	0.00411112	Unigene0000280;Unigene0006311;Unigene0022598;Unigene0030265;Unigene0030267;Unigene0030297
M1+M6	Biological Process	GO:1903530	regulation of secretion by cell	34	0.000151556	0.00418794	Unigene0000507;Unigene0001804;Unigene0005277;Unigene0005467;Unigene0006058;Unigene0006096;Unigene0006716;Unigene0007779;Unigene0029621;Unigene0030434;Unigene0030794;Unigene0030852;Unigene0032660;Unigene0033055;Unigene0033555;Unigene0036303;Unigene0036941;Unigene0038181;Unigene0039317;Unigene0039793;Unigene0040260;Unigene0040719;Unigene0041412;Unigene0042117;Unigene0042585;Unigene0044311;Unigene00…
M1+M6	Biological Process	GO:0051046	regulation of secretion	39	0.00016654	0.00456016	Unigene0000507;Unigene0001804;Unigene0005277;Unigene0005467;Unigene0006058;Unigene0006096;Unigene0006716;Unigene0007779;Unigene0029621;Unigene0030434;Unigene0030794;Unigene0030852;Unigene0032660;Unigene0033055;Unigene0033555;Unigene0036303;Unigene0036941;Unigene0037263;Unigene0037266;Unigene0038181;Unigene0039317;Unigene0039793;Unigene0040260;Unigene0040719;Unigene0041412;Unigene0042117;Unigene00…
M1+M6	Biological Process	GO:0023051	regulation of signaling	184	0.000173214	0.00468462	Unigene0000252;Unigene0000280;Unigene0000507;Unigene0000627;Unigene0000681;Unigene0001014;Unigene0001338;Unigene0001673;Unigene0001708;Unigene0001795;Unigene0001817;Unigene0001843;Unigene0002819;Unigene0002917;Unigene0003637;Unigene0003755;Unigene0003934;Unigene0004236;Unigene0004293;Unigene0004512;Unigene0004519;Unigene0004750;Unigene0005247;Unigene0005460;Unigene0005467;Unigene0005479;Unigene00…
M1+M6	Biological Process	GO:0016358	dendrite development	8	0.000174196	0.00468462	Unigene0030265;Unigene0030267;Unigene0030297;Unigene0035516;Unigene0039317;Unigene0044321;Unigene0044642;Unigene0046834
M1+M6	Biological Process	GO:0044699	single-organism process	884	0.000206443	0.00549594	Unigene0000007;Unigene0000100;Unigene0000137;Unigene0000221;Unigene0000239;Unigene0000252;Unigene0000280;Unigene0000310;Unigene0000339;Unigene0000507;Unigene0000526;Unigene0000549;Unigene0000627;Unigene0000648;Unigene0000681;Unigene0000701;Unigene0000710;Unigene0000854;Unigene0000865;Unigene0000990;Unigene0001014;Unigene0001071;Unigene0001302;Unigene0001338;Unigene0001414;Unigene0001515;Unigene00…
M1+M6	Biological Process	GO:0048856	anatomical structure development	341	0.000208014	0.00549594	Unigene0000100;Unigene0000137;Unigene0000221;Unigene0000239;Unigene0000280;Unigene0000507;Unigene0000627;Unigene0000648;Unigene0000710;Unigene0000865;Unigene0000990;Unigene0001014;Unigene0001071;Unigene0001414;Unigene0001795;Unigene0001843;Unigene0001862;Unigene0001963;Unigene0002087;Unigene0002323;Unigene0002345;Unigene0002428;Unigene0002437;Unigene0003414;Unigene0003707;Unigene0003810;Unigene00…
M1+M6	Biological Process	GO:0010959	regulation of metal ion transport	25	0.000228639	0.00598834	Unigene0000990;Unigene0006971;Unigene0025843;Unigene0033055;Unigene0036303;Unigene0036858;Unigene0037485;Unigene0038613;Unigene0039793;Unigene0040076;Unigene0040260;Unigene0043489;Unigene0044642;Unigene0045597;Unigene0046038;Unigene0048008;Unigene0048155;Unigene0049012;Unigene0049013;Unigene0049015;Unigene0050884;Unigene0051092;Unigene0051337;Unigene0052657;Unigene0052778
M1+M6	Biological Process	GO:0010996	response to auditory stimulus	5	0.000238768	0.00609466	Unigene0030265;Unigene0030267;Unigene0030297;Unigene0040404;Unigene0045081
M1+M6	Biological Process	GO:0031223	auditory behavior	5	0.000238768	0.00609466	Unigene0030265;Unigene0030267;Unigene0030297;Unigene0040404;Unigene0045081
M1+M6	Biological Process	GO:0097688	glutamate receptor clustering	5	0.000238768	0.00609466	Unigene0006311;Unigene0022598;Unigene0030265;Unigene0030267;Unigene0030297
M1+M6	Biological Process	GO:0006810	transport	293	0.000261274	0.00661308	Unigene0000100;Unigene0000280;Unigene0000310;Unigene0000507;Unigene0000627;Unigene0000701;Unigene0000990;Unigene0001302;Unigene0001414;Unigene0001804;Unigene0001997;Unigene0002044;Unigene0002158;Unigene0002323;Unigene0002803;Unigene0002819;Unigene0002905;Unigene0002956;Unigene0003261;Unigene0003401;Unigene0003411;Unigene0003755;Unigene0003777;Unigene0004393;Unigene0004722;Unigene0004844;Unigene00…

## Sheet: Table S8
Table S8. Complete results of the GO enrichment analysis for the merged gene set in modules significantly associated with FL.
ModuleID	Ontology	GO ID	Description	Number of Genes	pvalue	fdr	geneID
M3+M4+M5	Cellular Component	GO:0043292	contractile fiber	37	3.59175e-35	5.85455e-33	Unigene0000308;Unigene0000507;Unigene0002241;Unigene0003896;Unigene0004892;Unigene0006181;Unigene0006585;Unigene0008383;Unigene0013155;Unigene0019700;Unigene0024157;Unigene0024749;Unigene0030234;Unigene0032379;Unigene0034336;Unigene0034474;Unigene0035986;Unigene0036061;Unigene0037708;Unigene0038246;Unigene0039857;Unigene0042554;Unigene0043001;Unigene0044687;Unigene0044688;Unigene0045263;Unigene00…
M3+M4+M5	Cellular Component	GO:0044449	contractile fiber part	33	1.02052e-32	8.31727e-31	Unigene0000308;Unigene0000507;Unigene0002241;Unigene0004892;Unigene0006181;Unigene0006585;Unigene0008383;Unigene0013155;Unigene0019700;Unigene0024157;Unigene0024749;Unigene0030234;Unigene0032379;Unigene0034336;Unigene0034474;Unigene0035986;Unigene0036061;Unigene0037708;Unigene0038246;Unigene0039857;Unigene0042554;Unigene0044687;Unigene0044688;Unigene0045263;Unigene0045515;Unigene0049707;Unigene00…
M3+M4+M5	Cellular Component	GO:0030016	myofibril	24	4.60117e-22	2.49997e-20	Unigene0000308;Unigene0000507;Unigene0002241;Unigene0006181;Unigene0006585;Unigene0008383;Unigene0013155;Unigene0019700;Unigene0024749;Unigene0030234;Unigene0032379;Unigene0034474;Unigene0035986;Unigene0036061;Unigene0038246;Unigene0039857;Unigene0044687;Unigene0044688;Unigene0050605;Unigene0051087;Unigene0051088;Unigene0051976;Unigene0063380;Unigene0070558
M3+M4+M5	Cellular Component	GO:0030017	sarcomere	20	1.3291e-18	5.41609e-17	Unigene0000308;Unigene0000507;Unigene0002241;Unigene0006181;Unigene0006585;Unigene0008383;Unigene0013155;Unigene0019700;Unigene0024749;Unigene0030234;Unigene0032379;Unigene0034474;Unigene0035986;Unigene0036061;Unigene0039857;Unigene0044687;Unigene0044688;Unigene0050605;Unigene0051087;Unigene0070558
M3+M4+M5	Cellular Component	GO:0031674	I band	19	2.54089e-18	8.28329e-17	Unigene0000308;Unigene0000507;Unigene0002241;Unigene0006181;Unigene0006585;Unigene0008383;Unigene0013155;Unigene0019700;Unigene0024749;Unigene0030234;Unigene0032379;Unigene0035986;Unigene0036061;Unigene0039857;Unigene0044687;Unigene0044688;Unigene0050605;Unigene0051087;Unigene0070558
M3+M4+M5	Cellular Component	GO:0015629	actin cytoskeleton	12	1.92666e-07	5.23409e-06	Unigene0001872;Unigene0003896;Unigene0004890;Unigene0026167;Unigene0037708;Unigene0038246;Unigene0042554;Unigene0050605;Unigene0052871;Unigene0052872;Unigene0060931;Unigene0063380
M3+M4+M5	Cellular Component	GO:0043228	non-membrane-bounded organelle	51	1.82093e-06	3.71014e-05	Unigene0000308;Unigene0000507;Unigene0001440;Unigene0001872;Unigene0002241;Unigene0003896;Unigene0004772;Unigene0004890;Unigene0004892;Unigene0006013;Unigene0006181;Unigene0006585;Unigene0006855;Unigene0008383;Unigene0013155;Unigene0014074;Unigene0019700;Unigene0024157;Unigene0024317;Unigene0024749;Unigene0026167;Unigene0030234;Unigene0032379;Unigene0033249;Unigene0034336;Unigene0034474;Unigene00…
M3+M4+M5	Cellular Component	GO:0043232	intracellular non-membrane-bounded organelle	51	1.82093e-06	3.71014e-05	Unigene0000308;Unigene0000507;Unigene0001440;Unigene0001872;Unigene0002241;Unigene0003896;Unigene0004772;Unigene0004890;Unigene0004892;Unigene0006013;Unigene0006181;Unigene0006585;Unigene0006855;Unigene0008383;Unigene0013155;Unigene0014074;Unigene0019700;Unigene0024157;Unigene0024317;Unigene0024749;Unigene0026167;Unigene0030234;Unigene0032379;Unigene0033249;Unigene0034336;Unigene0034474;Unigene00…
M3+M4+M5	Cellular Component	GO:0016459	myosin complex	5	2.02424e-05	0.000366612	Unigene0037708;Unigene0042554;Unigene0050605;Unigene0052871;Unigene0052872
M3+M4+M5	Cellular Component	GO:0044291	cell-cell contact zone	5	2.36545e-05	0.000385568	Unigene0035583;Unigene0037708;Unigene0042554;Unigene0045515;Unigene0052871
M3+M4+M5	Cellular Component	GO:0005737	cytoplasm	58	2.8233e-05	0.000418361	Unigene0000308;Unigene0000507;Unigene0001440;Unigene0001605;Unigene0001670;Unigene0001962;Unigene0002241;Unigene0003896;Unigene0004892;Unigene0005974;Unigene0006181;Unigene0006585;Unigene0007401;Unigene0007607;Unigene0008239;Unigene0008383;Unigene0013155;Unigene0019700;Unigene0024157;Unigene0024749;Unigene0026918;Unigene0028403;Unigene0029063;Unigene0029518;Unigene0030234;Unigene0032379;Unigene00…
M3+M4+M5	Cellular Component	GO:0044444	cytoplasmic part	57	5.03197e-05	0.00068351	Unigene0000308;Unigene0000507;Unigene0001440;Unigene0001605;Unigene0001962;Unigene0002241;Unigene0003896;Unigene0004892;Unigene0005974;Unigene0006181;Unigene0006585;Unigene0007401;Unigene0007607;Unigene0008239;Unigene0008383;Unigene0013155;Unigene0019700;Unigene0024157;Unigene0024749;Unigene0026918;Unigene0028403;Unigene0029063;Unigene0029518;Unigene0030234;Unigene0032379;Unigene0033252;Unigene00…
M3+M4+M5	Cellular Component	GO:0005783	endoplasmic reticulum	10	0.000203854	0.00255601	Unigene0005974;Unigene0007607;Unigene0013155;Unigene0024157;Unigene0028403;Unigene0030234;Unigene0034474;Unigene0037122;Unigene0049707;Unigene0052165
M3+M4+M5	Cellular Component	GO:0036379	myofilament	4	0.000444084	0.0051704	Unigene0032379;Unigene0038246;Unigene0044687;Unigene0063380
M3+M4+M5	Cellular Component	GO:0005913	cell-cell adherens junction	3	0.000596602	0.00648307	Unigene0006181;Unigene0035583;Unigene0043001
M3+M4+M5	Cellular Component	GO:0005576	extracellular region	19	0.000721709	0.00735241	Unigene0001414;Unigene0001962;Unigene0007607;Unigene0014076;Unigene0014411;Unigene0020061;Unigene0020803;Unigene0023440;Unigene0026189;Unigene0027836;Unigene0028403;Unigene0032056;Unigene0032301;Unigene0032759;Unigene0037122;Unigene0038246;Unigene0040319;Unigene0058022;Unigene0063380
M3+M4+M5	Molecular Function	GO:0008092	cytoskeletal protein binding	31	1.70608e-12	3.99222e-10	Unigene0000308;Unigene0002241;Unigene0006013;Unigene0006347;Unigene0006585;Unigene0007088;Unigene0007860;Unigene0008383;Unigene0014074;Unigene0019700;Unigene0024317;Unigene0024749;Unigene0026167;Unigene0029518;Unigene0032379;Unigene0036986;Unigene0037708;Unigene0038246;Unigene0042554;Unigene0043001;Unigene0045515;Unigene0050605;Unigene0051087;Unigene0051088;Unigene0051089;Unigene0051507;Unigene00…
M3+M4+M5	Molecular Function	GO:0005515	protein binding	76	2.37918e-05	0.00278364	Unigene0000139;Unigene0000308;Unigene0000507;Unigene0000990;Unigene0001414;Unigene0001440;Unigene0001605;Unigene0001962;Unigene0002241;Unigene0002930;Unigene0005974;Unigene0006013;Unigene0006181;Unigene0006347;Unigene0006585;Unigene0007088;Unigene0007860;Unigene0008383;Unigene0008440;Unigene0013155;Unigene0014074;Unigene0014076;Unigene0014604;Unigene0019700;Unigene0020061;Unigene0020803;Unigene00…
M3+M4+M5	Molecular Function	GO:0042805	actinin binding	5	0.000140519	0.00940132	Unigene0002241;Unigene0006585;Unigene0008383;Unigene0032379;Unigene0043001
M3+M4+M5	Molecular Function	GO:0001104	RNA polymerase II transcription cofactor activity	5	0.000175965	0.00940132	Unigene0002930;Unigene0004772;Unigene0028918;Unigene0034336;Unigene0045707
M3+M4+M5	Molecular Function	GO:0005198	structural molecule activity	11	0.000200883	0.00940132	Unigene0007607;Unigene0019700;Unigene0032056;Unigene0032379;Unigene0036061;Unigene0037122;Unigene0042554;Unigene0044687;Unigene0060931;Unigene0063380;Unigene0070558
M3+M4+M5	Molecular Function	GO:0051393	alpha-actinin binding	4	0.000707379	0.0275878	Unigene0002241;Unigene0006585;Unigene0032379;Unigene0043001
M3+M4+M5	Molecular Function	GO:0001076	transcription factor activity, RNA polymerase II transcription factor binding	5	0.00184159	0.0604925	Unigene0002930;Unigene0004772;Unigene0028918;Unigene0034336;Unigene0045707
M3+M4+M5	Molecular Function	GO:0003779	actin binding	7	0.00206812	0.0604925	Unigene0000308;Unigene0007860;Unigene0026167;Unigene0032379;Unigene0042554;Unigene0051087;Unigene0051088
M3+M4+M5	Biological Process	GO:0003012	muscle system process	26	4.60221e-17	6.30042e-14	Unigene0000308;Unigene0000507;Unigene0003896;Unigene0006043;Unigene0006181;Unigene0006347;Unigene0007088;Unigene0013155;Unigene0019700;Unigene0024582;Unigene0025763;Unigene0027836;Unigene0029518;Unigene0032379;Unigene0034474;Unigene0036986;Unigene0037708;Unigene0038246;Unigene0042554;Unigene0049707;Unigene0052165;Unigene0052871;Unigene0056770;Unigene0063380;Unigene0065816;Unigene0070558
M3+M4+M5	Biological Process	GO:0055002	striated muscle cell development	17	1.30124e-14	8.90695e-12	Unigene0000507;Unigene0006347;Unigene0019700;Unigene0024582;Unigene0025763;Unigene0028918;Unigene0032379;Unigene0035583;Unigene0038246;Unigene0049707;Unigene0050605;Unigene0051087;Unigene0051088;Unigene0052165;Unigene0056770;Unigene0063380;Unigene0070558
M3+M4+M5	Biological Process	GO:0055001	muscle cell development	17	2.58379e-14	1.17907e-11	Unigene0000507;Unigene0006347;Unigene0019700;Unigene0024582;Unigene0025763;Unigene0028918;Unigene0032379;Unigene0035583;Unigene0038246;Unigene0049707;Unigene0050605;Unigene0051087;Unigene0051088;Unigene0052165;Unigene0056770;Unigene0063380;Unigene0070558
M3+M4+M5	Biological Process	GO:0051146	striated muscle cell differentiation	19	3.9569e-14	1.35425e-11	Unigene0000507;Unigene0006347;Unigene0019700;Unigene0024582;Unigene0025763;Unigene0028918;Unigene0030392;Unigene0032379;Unigene0033512;Unigene0035583;Unigene0038246;Unigene0049707;Unigene0050605;Unigene0051087;Unigene0051088;Unigene0052165;Unigene0056770;Unigene0063380;Unigene0070558
M3+M4+M5	Biological Process	GO:0003008	system process	39	1.9013e-13	5.20577e-11	Unigene0000308;Unigene0000507;Unigene0000990;Unigene0001414;Unigene0001962;Unigene0003896;Unigene0006043;Unigene0006181;Unigene0006347;Unigene0007088;Unigene0009277;Unigene0013155;Unigene0015321;Unigene0019700;Unigene0020803;Unigene0023440;Unigene0024582;Unigene0025763;Unigene0026167;Unigene0027836;Unigene0029518;Unigene0032056;Unigene0032301;Unigene0032379;Unigene0033249;Unigene0034474;Unigene00…
M3+M4+M5	Biological Process	GO:0061061	muscle structure development	25	3.3018e-13	7.53361e-11	Unigene0000507;Unigene0006043;Unigene0006347;Unigene0008383;Unigene0019700;Unigene0024157;Unigene0024582;Unigene0025763;Unigene0028918;Unigene0030234;Unigene0030392;Unigene0032379;Unigene0033512;Unigene0034336;Unigene0035583;Unigene0038246;Unigene0044687;Unigene0049707;Unigene0050605;Unigene0051087;Unigene0051088;Unigene0052165;Unigene0056770;Unigene0063380;Unigene0070558
M3+M4+M5	Biological Process	GO:0042692	muscle cell differentiation	20	6.54276e-12	1.27958e-09	Unigene0000507;Unigene0006347;Unigene0019700;Unigene0024157;Unigene0024582;Unigene0025763;Unigene0028918;Unigene0030392;Unigene0032379;Unigene0033512;Unigene0035583;Unigene0038246;Unigene0049707;Unigene0050605;Unigene0051087;Unigene0051088;Unigene0052165;Unigene0056770;Unigene0063380;Unigene0070558
M3+M4+M5	Biological Process	GO:0006941	striated muscle contraction	13	3.22595e-10	5.52041e-08	Unigene0006347;Unigene0007088;Unigene0019700;Unigene0025763;Unigene0029518;Unigene0032379;Unigene0034474;Unigene0036986;Unigene0038246;Unigene0042554;Unigene0056770;Unigene0065816;Unigene0070558
M3+M4+M5	Biological Process	GO:0014902	myotube differentiation	10	5.161e-10	7.85045e-08	Unigene0000507;Unigene0006347;Unigene0025763;Unigene0033512;Unigene0038246;Unigene0049707;Unigene0052165;Unigene0056770;Unigene0063380;Unigene0070558
M3+M4+M5	Biological Process	GO:0014904	myotube cell development	7	2.17633e-09	2.97939e-07	Unigene0000507;Unigene0025763;Unigene0038246;Unigene0049707;Unigene0052165;Unigene0056770;Unigene0063380
M3+M4+M5	Biological Process	GO:0006936	muscle contraction	15	2.93361e-09	3.65101e-07	Unigene0006043;Unigene0006347;Unigene0007088;Unigene0019700;Unigene0025763;Unigene0029518;Unigene0032379;Unigene0034474;Unigene0036986;Unigene0038246;Unigene0042554;Unigene0052165;Unigene0056770;Unigene0065816;Unigene0070558
M3+M4+M5	Biological Process	GO:0030048	actin filament-based movement	10	7.01949e-09	8.00807e-07	Unigene0006181;Unigene0019700;Unigene0029518;Unigene0038246;Unigene0042554;Unigene0044687;Unigene0052871;Unigene0052872;Unigene0063380;Unigene0065816
M3+M4+M5	Biological Process	GO:0044057	regulation of system process	15	1.4175e-08	1.49274e-06	Unigene0000507;Unigene0001414;Unigene0006043;Unigene0006181;Unigene0006347;Unigene0007088;Unigene0013155;Unigene0015321;Unigene0020803;Unigene0023440;Unigene0029518;Unigene0034474;Unigene0036986;Unigene0044010;Unigene0065816
M3+M4+M5	Biological Process	GO:0033275	actin-myosin filament sliding	7	3.405e-07	3.32961e-05	Unigene0006181;Unigene0019700;Unigene0029518;Unigene0042554;Unigene0044687;Unigene0063380;Unigene0065816
M3+M4+M5	Biological Process	GO:0070252	actin-mediated cell contraction	8	8.05167e-07	7.34849e-05	Unigene0006181;Unigene0019700;Unigene0029518;Unigene0038246;Unigene0042554;Unigene0044687;Unigene0063380;Unigene0065816
M3+M4+M5	Biological Process	GO:0030029	actin filament-based process	18	1.49161e-06	0.000127626	Unigene0002241;Unigene0006181;Unigene0006347;Unigene0007860;Unigene0019700;Unigene0023440;Unigene0029518;Unigene0032379;Unigene0035583;Unigene0036061;Unigene0038246;Unigene0042554;Unigene0044687;Unigene0052871;Unigene0052872;Unigene0063380;Unigene0065816;Unigene0070558
M3+M4+M5	Biological Process	GO:0090257	regulation of muscle system process	9	2.41424e-06	0.000194418	Unigene0000507;Unigene0006043;Unigene0006347;Unigene0007088;Unigene0013155;Unigene0029518;Unigene0034474;Unigene0036986;Unigene0065816
M3+M4+M5	Biological Process	GO:0032501	multicellular organismal process	69	3.98529e-06	0.000303103	Unigene0000308;Unigene0000507;Unigene0000990;Unigene0001414;Unigene0001962;Unigene0002930;Unigene0003896;Unigene0004772;Unigene0004890;Unigene0005974;Unigene0006043;Unigene0006181;Unigene0006347;Unigene0007088;Unigene0007607;Unigene0008383;Unigene0009277;Unigene0013155;Unigene0014074;Unigene0014076;Unigene0014604;Unigene0015321;Unigene0019700;Unigene0020061;Unigene0020803;Unigene0023440;Unigene00…
M3+M4+M5	Biological Process	GO:0007517	muscle organ development	11	5.57065e-06	0.00040138	Unigene0006043;Unigene0008383;Unigene0019700;Unigene0024157;Unigene0028918;Unigene0030234;Unigene0032379;Unigene0033512;Unigene0034336;Unigene0038246;Unigene0052165
M3+M4+M5	Biological Process	GO:0009991	response to extracellular stimulus	8	1.30239e-05	0.000891485	Unigene0007607;Unigene0020061;Unigene0020803;Unigene0023440;Unigene0028438;Unigene0033249;Unigene0037122;Unigene0060020
M3+M4+M5	Biological Process	GO:0014897	striated muscle hypertrophy	6	2.14195e-05	0.00139635	Unigene0000507;Unigene0006347;Unigene0019700;Unigene0027836;Unigene0032379;Unigene0070558
M3+M4+M5	Biological Process	GO:0031032	actomyosin structure organization	7	3.06544e-05	0.00190754	Unigene0002241;Unigene0019700;Unigene0032379;Unigene0035583;Unigene0038246;Unigene0044687;Unigene0070558
M3+M4+M5	Biological Process	GO:0031667	response to nutrient levels	7	4.48211e-05	0.00266783	Unigene0007607;Unigene0020061;Unigene0020803;Unigene0023440;Unigene0028438;Unigene0033249;Unigene0037122
M3+M4+M5	Biological Process	GO:0014896	muscle hypertrophy	6	4.82725e-05	0.00275354	Unigene0000507;Unigene0006347;Unigene0019700;Unigene0027836;Unigene0032379;Unigene0070558
M3+M4+M5	Biological Process	GO:0014706	striated muscle tissue development	10	5.826e-05	0.00314235	Unigene0006043;Unigene0024157;Unigene0028918;Unigene0029487;Unigene0030234;Unigene0033512;Unigene0034336;Unigene0052165;Unigene0060931;Unigene0070558
M3+M4+M5	Biological Process	GO:0060415	muscle tissue morphogenesis	7	5.96794e-05	0.00314235	Unigene0006043;Unigene0008383;Unigene0019700;Unigene0028918;Unigene0032379;Unigene0034336;Unigene0038246
M3+M4+M5	Biological Process	GO:0048644	muscle organ morphogenesis	7	7.83457e-05	0.00397242	Unigene0006043;Unigene0008383;Unigene0019700;Unigene0028918;Unigene0032379;Unigene0034336;Unigene0038246
M3+M4+M5	Biological Process	GO:0060537	muscle tissue development	10	0.000102781	0.00502526	Unigene0006043;Unigene0024157;Unigene0028918;Unigene0029487;Unigene0030234;Unigene0033512;Unigene0034336;Unigene0052165;Unigene0060931;Unigene0070558
M3+M4+M5	Biological Process	GO:0006599	phosphagen metabolic process	2	0.000115637	0.00527691	Unigene0004892;Unigene0026918
M3+M4+M5	Biological Process	GO:0006603	phosphocreatine metabolic process	2	0.000115637	0.00527691	Unigene0004892;Unigene0026918
M3+M4+M5	Biological Process	GO:0043500	muscle adaptation	5	0.000145002	0.00626752	Unigene0000507;Unigene0006347;Unigene0019700;Unigene0052165;Unigene0063380
M3+M4+M5	Biological Process	GO:0009612	response to mechanical stimulus	7	0.000146502	0.00626752	Unigene0019700;Unigene0032379;Unigene0034336;Unigene0037122;Unigene0045515;Unigene0052871;Unigene0070558

## Sheet: Table S9
Table S9 Outlier loci (N = 349) identified in two tests for selection. ‘SNP position’ shows the position in the contig that contains the outlier loci. ‘Tests’ shows which tests identified the SNP as an outlier.
Contig	SNP position	Gene	Tests
Unigene0031564	418	PREDICTED: protein NipSnap homolog 3A [Rhinolophus sinicus]	Bayenv2/LFMM/PCAdapt
Unigene0020544	176	PREDICTED: complement C1q-like protein 2, partial [Equus przewalskii]	Bayenv2/LFMM/PCAdapt
Unigene0031746	1878	PREDICTED: protein FAM45A isoform X2 [Mus musculus]	Bayenv2/LFMM/PCAdapt
Unigene0008250	864	PREDICTED: teashirt homolog 1 [Leptonychotes weddellii]	Bayenv2/LFMM/PCAdapt
Unigene0033184	250	PREDICTED: microtubule-associated protein RP/EB family member 3 [Nomascus leucogenys]	Bayenv2/LFMM/PCAdapt
Unigene0046232	6346	PREDICTED: E1A-binding protein p400 isoform X8 [Hipposideros armiger]	Bayenv2/LFMM
Unigene0044780	495	PREDICTED: histone-lysine N-methyltransferase EHMT1 isoform X1 [Rhinolophus sinicus]	Bayenv2/LFMM
Unigene0050370	1173	PREDICTED: TRPM8 channel-associated factor 2 [Rhinolophus sinicus]	Bayenv2/LFMM
Unigene0049162	79	PREDICTED: collagen alpha-1(III) chain-like [Bos taurus]	Bayenv2/LFMM
Unigene0007438	4100	chromosome 15 open reading frame 39, isoform CRA_b [Homo sapiens]	Bayenv2/LFMM
Unigene0007773	383	PREDICTED: protein KRBA1 isoform X5 [Rhinolophus sinicus]	Bayenv2/LFMM
Unigene0008614	2015	PREDICTED: guanine nucleotide exchange factor VAV2 isoform X6 [Rhinolophus sinicus]	Bayenv2/LFMM
Unigene0044314	594	PREDICTED: zinc finger protein 17-like [Ceratotherium simum simum]	Bayenv2/LFMM
Unigene0005403	2781	PREDICTED: leucine-rich repeat-containing G-protein coupled receptor 6 isoform X1 [Rhinolophus sinicus]	Bayenv2/LFMM
Unigene0049225	4063	PREDICTED: kin of IRRE-like protein 3 isoform X3 [Hipposideros armiger]	Bayenv2/LFMM
Unigene0033700	2617	PREDICTED: APC membrane recruitment protein 1 [Rhinolophus sinicus]	Bayenv2/PCAdapt
Unigene0029454	1697	PREDICTED: PWWP domain-containing protein 2B isoform X1 [Rhinolophus sinicus]	LFMM/PCAdapt
Unigene0039223	1481	PREDICTED: DNA excision repair protein ERCC-6-like 2 isoform X1 [Rhinolophus sinicus]	LFMM/PCAdapt
Unigene0045232	1694	PREDICTED: synapse differentiation-inducing gene protein 1-like isoform X1 [Rhinolophus sinicus]	LFMM/PCAdapt
Unigene0033170	231	--	LFMM/PCAdapt
Unigene0051861	719	PREDICTED: protocadherin beta-6 [Equus caballus]	LFMM/PCAdapt
Unigene0039016	903	PREDICTED: C-C chemokine receptor type 2 [Rhinolophus sinicus]	LFMM/PCAdapt
Unigene0035200	361	PREDICTED: 39S ribosomal protein L15, mitochondrial [Rhinolophus sinicus]	LFMM/PCAdapt
Unigene0044026	81	--	LFMM/PCAdapt
Unigene0032343	2056	PREDICTED: protein ARV1 [Rhinolophus sinicus]	LFMM/PCAdapt
Unigene0035938	92	PREDICTED: G1/S-specific cyclin-E2 isoform X1 [Rhinolophus sinicus]	LFMM/PCAdapt
Unigene0040087	943	PREDICTED: oral-facial-digital syndrome 1 protein isoform X3 [Rhinolophus sinicus]	LFMM/PCAdapt
Unigene0043653	574	PREDICTED: trafficking protein particle complex subunit 6B [Ceratotherium simum simum]	LFMM/PCAdapt
Unigene0030005	457	hCG1817774 [Homo sapiens]	LFMM/PCAdapt
Unigene0024070	132	PREDICTED: synaptotagmin-16-like, partial [Rhinolophus sinicus]	LFMM/PCAdapt
Unigene0044921	3679	PREDICTED: LOW QUALITY PROTEIN: butyrophilin-like protein 10 [Rousettus aegyptiacus]	LFMM/PCAdapt
Unigene0005552	364	PREDICTED: osteoclast-stimulating factor 1 [Rhinolophus sinicus]	LFMM/PCAdapt
Unigene0046897	2144	PREDICTED: coiled-coil domain-containing protein 78 isoform X3 [Rhinolophus sinicus]	LFMM/PCAdapt
Unigene0006866	1858	PREDICTED: post-GPI attachment to proteins factor 3 [Rhinolophus sinicus]	LFMM/PCAdapt
Unigene0022755	880	PREDICTED: CD164 sialomucin-like 2 protein isoform X2 [Rhinolophus sinicus]	LFMM/PCAdapt
Unigene0039612	1623	PREDICTED: UPF0600 protein C5orf51 homolog isoform X2 [Rhinolophus sinicus]	LFMM/PCAdapt
Unigene0050615	547	PREDICTED: hematological and neurological expressed 1-like protein [Rhinolophus sinicus]	LFMM/PCAdapt
Unigene0041176	1111	PREDICTED: fatty acid desaturase 2 [Rhinolophus sinicus]	LFMM/PCAdapt
Unigene0049241	1116	PREDICTED: patatin-like phospholipase domain-containing protein 2 [Rhinolophus sinicus]	LFMM/PCAdapt
Unigene0005167	752	PREDICTED: testis-specific Y-encoded-like protein 2 [Rhinolophus sinicus]	LFMM/PCAdapt
Unigene0045910	1436	PREDICTED: LOW QUALITY PROTEIN: TRAF-interacting protein with FHA domain-containing protein A [Rhinolophus sinicus]	LFMM/PCAdapt
Unigene0044907	473	PREDICTED: transcriptional adapter 2-beta [Rhinolophus sinicus]	LFMM/PCAdapt
Unigene0036303	1978	PREDICTED: corticotropin-releasing factor receptor 1 isoform X1 [Pan troglodytes]	LFMM/PCAdapt
Unigene0042127	3138	PREDICTED: calcineurin-binding protein cabin-1 [Rhinolophus sinicus]	LFMM/PCAdapt
Unigene0003643	496	PREDICTED: transmembrane and coiled-coil domain-containing protein 3 isoform X2 [Rhinolophus sinicus]	LFMM/PCAdapt
Unigene0067947	442	PREDICTED: LOW QUALITY PROTEIN: uncharacterized protein LOC103300225 [Eptesicus fuscus]	LFMM/PCAdapt
Unigene0042394	1592	PREDICTED: E3 ubiquitin-protein ligase CBL-B isoform X1 [Rhinolophus sinicus]	LFMM/PCAdapt
Unigene0021168	518	protein GREB1 isoform 3 [Camelus ferus]	LFMM/PCAdapt
Unigene0045999	407	PREDICTED: DNA repair protein complementing XP-C cells [Rhinolophus sinicus]	LFMM/PCAdapt
Unigene0044623	1456	PREDICTED: zinc finger protein 705A-like [Rhinolophus sinicus]	LFMM/PCAdapt
Unigene0040537	2881	PREDICTED: dual specificity mitogen-activated protein kinase kinase 1 isoform X1 [Rhinolophus sinicus]	LFMM/PCAdapt
Unigene0041999	2616	PREDICTED: RING finger protein 10 [Rhinolophus sinicus]	LFMM/PCAdapt
Unigene0034578	789	PREDICTED: transcription factor AP-2-beta isoform X1 [Dasypus novemcinctus]	LFMM/PCAdapt
Unigene0036784	2286	PREDICTED: otogelin-like protein [Rhinolophus sinicus]	LFMM/PCAdapt
Unigene0006281	833	PREDICTED: vacuolar protein sorting-associated protein 51 homolog [Rhinolophus sinicus]	LFMM/PCAdapt
Unigene0052679	2150	PREDICTED: Parkinson disease 7 domain-containing protein 1 isoform X3 [Rhinolophus sinicus]	LFMM/PCAdapt
Unigene0033483	163	PREDICTED: probable 18S rRNA (guanine-N(7))-methyltransferase [Rhinolophus sinicus]	LFMM/PCAdapt
Unigene0038382	2279	PREDICTED: phosphofurin acidic cluster sorting protein 1 isoform X1 [Rhinolophus sinicus]	LFMM/PCAdapt
Unigene0035029	391	PREDICTED: E3 ubiquitin-protein ligase HACE1 isoform X2 [Pteropus alecto]	LFMM/PCAdapt
Unigene0022921	890	PREDICTED: LOW QUALITY PROTEIN: F-box only protein 9 [Rhinolophus sinicus]	LFMM/PCAdapt
Unigene0044766	828	PREDICTED: ribose-phosphate pyrophosphokinase 2 [Hipposideros armiger]	LFMM/PCAdapt
Unigene0002708	355	--	LFMM/PCAdapt
Unigene0047173	7194	PREDICTED: nuclear receptor coactivator 6 isoform X1 [Rhinolophus sinicus]	LFMM/PCAdapt
Unigene0040281	1280	--	LFMM/PCAdapt
Unigene0036989	1106	PREDICTED: T-complex protein 1 subunit eta [Rhinolophus sinicus]	LFMM/PCAdapt
Unigene0029960	1621	PREDICTED: retinoic acid-induced protein 3 [Rhinolophus sinicus]	LFMM/PCAdapt
Unigene0048423	804	PREDICTED: protein SLFN14-like [Rhinolophus sinicus]	LFMM/PCAdapt
Unigene0005986	139	PREDICTED: zinc finger protein 469 [Rhinolophus sinicus]	LFMM/PCAdapt
Unigene0040829	1452	PREDICTED: sn1-specific diacylglycerol lipase alpha [Rhinolophus sinicus]	LFMM/PCAdapt
Unigene0033209	3019	PREDICTED: phosphatidylinositide phosphatase SAC2 isoform X1 [Rhinolophus sinicus]	LFMM/PCAdapt
Unigene0038944	2029	PREDICTED: leucine-rich repeat and transmembrane domain-containing protein 2 [Rhinolophus sinicus]	LFMM/PCAdapt
Unigene0044836	55	PREDICTED: RAD50-interacting protein 1 isoform X1 [Rhinolophus sinicus]	LFMM/PCAdapt
Unigene0037286	2044	PREDICTED: TBC1 domain family member 15 isoform X2 [Rhinolophus sinicus]	LFMM/PCAdapt
Unigene0051261	4850	GA repeat binding protein, beta 2 (predicted) [Rhinolophus ferrumequinum]	LFMM/PCAdapt
Unigene0041913	2522	PREDICTED: UDP-GalNAc:beta-1,3-N-acetylgalactosaminyltransferase 1 isoform X1 [Hipposideros armiger]	LFMM/PCAdapt
Unigene0029561	456	RING finger protein 4 [Pteropus alecto]	LFMM/PCAdapt
Unigene0002474	605	PREDICTED: Ig heavy chain Mem5-like [Miniopterus natalensis]	LFMM/PCAdapt
Unigene0044271	1915	--	LFMM/PCAdapt
Unigene0028165	38	PREDICTED: endothelial differentiation-related factor 1, partial [Myotis brandtii]	LFMM/PCAdapt
Unigene0039641	408	PREDICTED: integrin beta-5 [Protobothrops mucrosquamatus]	LFMM/PCAdapt
Unigene0030247	408	PREDICTED: SAC3 domain-containing protein 1 [Rhinolophus sinicus]	LFMM/PCAdapt
Unigene0035507	143	PREDICTED: leucine-rich single-pass membrane protein 1 isoform X1 [Rhinolophus sinicus]	LFMM/PCAdapt
Unigene0033041	1462	--	LFMM/PCAdapt
Unigene0014023	224	--	LFMM/PCAdapt
Unigene0045455	882	PREDICTED: armadillo repeat-containing X-linked protein 3 [Rhinolophus sinicus]	LFMM/PCAdapt
Unigene0035102	3130	PREDICTED: LOW QUALITY PROTEIN: zinc finger protein 282 [Myotis lucifugus]	LFMM/PCAdapt
Unigene0022768	591	PREDICTED: zinc finger protein 346 isoform X2 [Hipposideros armiger]	LFMM/PCAdapt
Unigene0070153	1822	PREDICTED: carbohydrate sulfotransferase 7 [Rhinolophus sinicus]	LFMM/PCAdapt
Unigene0047938	2964	PREDICTED: nucleotide-binding oligomerization domain-containing protein 1 isoform X1 [Rhinolophus sinicus]	LFMM/PCAdapt
Unigene0043612	1392	PREDICTED: E3 SUMO-protein ligase ZNF451 isoform X2 [Rhinolophus sinicus]	LFMM/PCAdapt
Unigene0000367	1169	PREDICTED: prosaposin isoform X1 [Rhinolophus sinicus]	LFMM/PCAdapt
Unigene0055879	295	--	LFMM/PCAdapt
Unigene0001151	2332	PREDICTED: leukemia inhibitory factor receptor [Rhinolophus sinicus]	LFMM/PCAdapt
Unigene0029446	552	PREDICTED: TBC1 domain family member 25 [Rhinolophus sinicus]	LFMM/PCAdapt
Unigene0041225	604	--	LFMM/PCAdapt
Unigene0036025	402	PREDICTED: claudin-11 [Rhinolophus sinicus]	LFMM/PCAdapt
Unigene0038992	205	PREDICTED: rho GDP-dissociation inhibitor 1 isoform X1 [Myotis davidii]	LFMM/PCAdapt
Unigene0044004	500	--	LFMM/PCAdapt
Unigene0033224	1970	PREDICTED: transcription factor AP-2 gamma isoform X1 [Odobenus rosmarus divergens]	LFMM/PCAdapt
Unigene0047776	2518	PREDICTED: SUMO-specific isopeptidase USPL1 isoform X2 [Rhinolophus sinicus]	LFMM/PCAdapt
Unigene0005943	1188	PREDICTED: protein-tyrosine sulfotransferase 1 isoform X1 [Hipposideros armiger]	LFMM/PCAdapt
Unigene0040404	3952	PREDICTED: neurexin-2-beta isoform X4 [Hipposideros armiger]	LFMM/PCAdapt
Unigene0004892	368	PREDICTED: creatine kinase S-type, mitochondrial [Rhinolophus sinicus]	LFMM/PCAdapt
Unigene0038150	776	PREDICTED: tetratricopeptide repeat protein 23 isoform X1 [Rhinolophus sinicus]	LFMM/PCAdapt
Unigene0038267	2946	PREDICTED: clustered mitochondria protein homolog isoform X3 [Rhinolophus sinicus]	LFMM/PCAdapt
Unigene0020382	337	PREDICTED: transmembrane protease serine 7 isoform X4 [Rhinolophus sinicus]	LFMM/PCAdapt
Unigene0044587	988	Band 3 anion transport protein [Fukomys damarensis]	LFMM/PCAdapt
Unigene0003142	1748	PREDICTED: bromo adjacent homology domain-containing 1 protein isoform X2 [Rhinolophus sinicus]	LFMM/PCAdapt
Unigene0063287	659	--	LFMM/PCAdapt
Unigene0046830	1816	PREDICTED: SURP and G-patch domain-containing protein 2 isoform X1 [Rhinolophus sinicus]	LFMM/PCAdapt
Unigene0022874	625	PREDICTED: rho-related GTP-binding protein RhoG isoform X1 [Physeter catodon]	LFMM/PCAdapt
Unigene0046227	2146	PREDICTED: store-operated calcium entry-associated regulatory factor [Rhinolophus sinicus]	LFMM/PCAdapt
Unigene0007095	2405	PREDICTED: LOW QUALITY PROTEIN: protein AHNAK2 [Hipposideros armiger]	LFMM/PCAdapt
Unigene0047489	1241	PREDICTED: adhesion G protein-coupled receptor E1 [Rhinolophus sinicus]	LFMM/PCAdapt
Unigene0026407	609	PREDICTED: tumor necrosis factor receptor superfamily member 8 isoform X2 [Rhinolophus sinicus]	LFMM/PCAdapt
Unigene0028324	750	--	LFMM/PCAdapt
Unigene0017291	896	PREDICTED: probable C-mannosyltransferase DPY19L2 [Rhinolophus sinicus]	LFMM/PCAdapt
Unigene0001678	657	PREDICTED: CMP-N-acetylneuraminate-beta-galactosamide-alpha-2,3-sialyltransferase 4 isoform X5 [Rhinolophus sinicus]	LFMM/PCAdapt
Unigene0007478	569	serine proteinase inhibitor, clade B, member 10 (predicted) [Rhinolophus ferrumequinum]	LFMM/PCAdapt
Unigene0038616	2753	PREDICTED: F-box/LRR-repeat protein 19 isoform X2 [Gorilla gorilla gorilla]	LFMM/PCAdapt
Unigene0002330	4517	PREDICTED: zinc finger protein 250 isoform X2 [Rhinolophus sinicus]	LFMM/PCAdapt
Unigene0004487	206	PREDICTED: immunoglobulin superfamily member 3-like [Equus przewalskii]	LFMM/PCAdapt
Unigene0045841	2276	PREDICTED: 5'-nucleotidase domain-containing protein 3, partial [Rhinolophus sinicus]	LFMM/PCAdapt
Unigene0032828	1113	Ras GTPase-activating protein-binding protein 1 [Fukomys damarensis]	LFMM/PCAdapt
Unigene0005460	683	PREDICTED: inositol 1,4,5-trisphosphate receptor type 1 isoform X5 [Canis lupus familiaris]	LFMM/PCAdapt
Unigene0049523	512	PREDICTED: beta-1,3-galactosyl-O-glycosyl-glycoprotein beta-1,6-N-acetylglucosaminyltransferase [Rhinolophus sinicus]	LFMM/PCAdapt
Unigene0050471	2491	PREDICTED: DNA repair endonuclease XPF [Rhinolophus sinicus]	LFMM/PCAdapt
Unigene0037960	166	PREDICTED: vesicle-associated membrane protein 7 [Bubalus bubalis]	LFMM/PCAdapt
Unigene0007769	695	PREDICTED: trafficking protein particle complex subunit 3-like protein isoform X1 [Condylura cristata]	LFMM/PCAdapt
Unigene0016765	183	--	LFMM/PCAdapt
Unigene0039402	407	PREDICTED: transmembrane protein 71 isoform X1 [Rhinolophus sinicus]	LFMM/PCAdapt
Unigene0049788	603	--	LFMM/PCAdapt
Unigene0043139	965	--	LFMM/PCAdapt
Unigene0032380	939	PREDICTED: gamma-sarcoglycan [Rhinolophus sinicus]	LFMM/PCAdapt
Unigene0038059	367	PREDICTED: survival of motor neuron-related-splicing factor 30 [Heterocephalus glaber]	LFMM/PCAdapt
Unigene0042554	300	PREDICTED: myosin-1-like [Hipposideros armiger]	LFMM/PCAdapt
Unigene0024864	522	PREDICTED: PIN2/TERF1-interacting telomerase inhibitor 1 [Rhinolophus sinicus]	LFMM/PCAdapt
Unigene0032863	397	PREDICTED: pyrroline-5-carboxylate reductase 2 isoform X1 [Camelus ferus]	LFMM/PCAdapt
Unigene0040728	737	PREDICTED: transcription factor SOX-17 [Rhinolophus sinicus]	LFMM/PCAdapt
Unigene0040047	2322	PREDICTED: 3-oxoacyl-[acyl-carrier-protein] synthase, mitochondrial [Rhinolophus sinicus]	LFMM/PCAdapt
Unigene0043786	1921	PREDICTED: retinol dehydrogenase 13 isoform X1 [Rhinolophus sinicus]	LFMM/PCAdapt
Unigene0023338	993	PREDICTED: aquaporin-3 [Rhinolophus sinicus]	LFMM/PCAdapt
Unigene0033144	1672	PREDICTED: palmitoyltransferase ZDHHC18, partial [Leptonychotes weddellii]	LFMM/PCAdapt
Unigene0007863	431	PREDICTED: D-tyrosyl-tRNA(Tyr) deacylase 1 [Rhinolophus sinicus]	LFMM/PCAdapt
Unigene0038653	572	Lupus La protein like protein [Pteropus alecto]	LFMM/PCAdapt
Unigene0047092	486	PREDICTED: band 4.1-like protein 3 isoform X1 [Rhinolophus sinicus]	LFMM/PCAdapt
Unigene0034977	913	PREDICTED: beta-1,3-galactosyl-O-glycosyl-glycoprotein beta-1,6-N-acetylglucosaminyltransferase 4 [Rhinolophus sinicus]	LFMM/PCAdapt
Unigene0047587	2192	PREDICTED: E3 ubiquitin-protein ligase HUWE1 isoform X3 [Rhinolophus sinicus]	LFMM/PCAdapt
Unigene0008811	858	PREDICTED: three-prime repair exonuclease 1 [Rhinolophus sinicus]	LFMM/PCAdapt
Unigene0035753	1479	--	LFMM/PCAdapt
Unigene0026451	419	PREDICTED: fibrillin-3 [Rhinolophus sinicus]	LFMM/PCAdapt
Unigene0039140	438	PREDICTED: calpain-5 [Rhinolophus sinicus]	LFMM/PCAdapt
Unigene0044897	1057	PREDICTED: wiskott-Aldrich syndrome protein family member 2 [Hipposideros armiger]	LFMM/PCAdapt
Unigene0002476	940	--	LFMM/PCAdapt
Unigene0051594	245	mKIAA1109 protein, partial [Mus musculus]	LFMM/PCAdapt
Unigene0037922	110	PREDICTED: cell division cycle protein 123 homolog [Rhinolophus sinicus]	LFMM/PCAdapt
Unigene0052712	1073	PREDICTED: potassium voltage-gated channel subfamily A member 2 [Rhinolophus sinicus]	LFMM/PCAdapt
Unigene0003503	1323	--	LFMM/PCAdapt
Unigene0006750	10932	PREDICTED: dynein heavy chain 11, axonemal isoform X1 [Rhinolophus sinicus]	LFMM/PCAdapt
Unigene0000847	3139	KIAA0895 protein, isoform CRA_b [Homo sapiens]	LFMM/PCAdapt
Unigene0031537	1651	PREDICTED: F-box only protein 6 [Canis lupus familiaris]	LFMM/PCAdapt
Unigene0034897	277	NADH dehydrogenase [ubiquinone] 1 alpha subcomplex subunit 4 [Tupaia chinensis]	LFMM/PCAdapt
Unigene0042717	630	PREDICTED: coiled-coil domain-containing protein 120 [Rhinolophus sinicus]	LFMM/PCAdapt
Unigene0032159	1006	PREDICTED: leukocyte elastase inhibitor [Rhinolophus sinicus]	LFMM/PCAdapt
Unigene0005070	112	--	LFMM/PCAdapt
Unigene0050056	1115	PREDICTED: adenosine receptor A2b [Hipposideros armiger]	LFMM/PCAdapt
Unigene0044435	476	PREDICTED: arfaptin-1-like isoform X1 [Rousettus aegyptiacus]	LFMM/PCAdapt
Unigene0044510	2128	PREDICTED: acetoacetyl-CoA synthetase [Rhinolophus sinicus]	LFMM/PCAdapt
Unigene0047568	1872	PREDICTED: calpastatin isoform X1 [Rhinolophus sinicus]	LFMM/PCAdapt
Unigene0037494	4000	PREDICTED: protein Shroom4 isoform X3 [Rhinolophus sinicus]	LFMM/PCAdapt
Unigene0032210	1592	PREDICTED: glutamate--cysteine ligase regulatory subunit [Rhinolophus sinicus]	LFMM/PCAdapt
Unigene0041989	1865	PREDICTED: C5a anaphylatoxin chemotactic receptor 1 [Rhinolophus sinicus]	LFMM/PCAdapt
Unigene0042450	913	PREDICTED: torsin-1B-like [Galeopterus variegatus]	LFMM/PCAdapt
Unigene0033382	836	PREDICTED: small conductance calcium-activated potassium channel protein 3 isoform X1 [Rhinolophus sinicus]	LFMM/PCAdapt
Unigene0040916	515	PREDICTED: zinc finger protein 555-like [Rhinolophus sinicus]	LFMM/PCAdapt
Unigene0008431	6102	PREDICTED: mucin-19 [Panthera pardus]	LFMM/PCAdapt
Unigene0028005	828	--	LFMM/PCAdapt
Unigene0043548	2535	PREDICTED: FYVE, RhoGEF and PH domain-containing protein 5 isoform X1 [Rhinolophus sinicus]	LFMM/PCAdapt
Unigene0042887	1453	PREDICTED: LOW QUALITY PROTEIN: protein TMEM155 [Rhinolophus sinicus]	LFMM/PCAdapt
Unigene0045909	1683	PREDICTED: structure-specific endonuclease subunit SLX1 isoform X1 [Rhinolophus sinicus]	LFMM/PCAdapt
Unigene0032834	1741	PREDICTED: jmjC domain-containing protein 7 [Rhinolophus sinicus]	LFMM/PCAdapt
Unigene0041412	1446	PREDICTED: ephrin type-A receptor 5 isoform X1 [Rhinolophus sinicus]	LFMM/PCAdapt
Unigene0050200	868	PREDICTED: membrane-associated phosphatidylinositol transfer protein 1 isoform X1 [Rhinolophus sinicus]	LFMM/PCAdapt
Unigene0035132	316	PREDICTED: keratin-associated protein 10-2-like isoform X3 [Condylura cristata]	LFMM/PCAdapt
Unigene0027244	1740	PREDICTED: EH domain-containing protein 2 [Rhinolophus sinicus]	LFMM/PCAdapt
Unigene0040135	1676	--	LFMM/PCAdapt
Unigene0035281	2320	PREDICTED: retinol dehydrogenase 12 isoform X2 [Rhinolophus sinicus]	LFMM/PCAdapt
Unigene0040223	163	PREDICTED: FAD-dependent oxidoreductase domain-containing protein 1 isoform X2 [Sus scrofa]	LFMM/PCAdapt
Unigene0003515	3317	PREDICTED: leptin receptor gene-related protein [Camelus bactrianus]	LFMM/PCAdapt
Unigene0069585	121	--	LFMM/PCAdapt
Unigene0035267	189	PREDICTED: retinoic acid receptor responder protein 1 [Rhinolophus sinicus]	LFMM/PCAdapt
Unigene0022748	379	PREDICTED: uncharacterized protein C1orf186 homolog [Rhinolophus sinicus]	LFMM/PCAdapt
Unigene0023394	258	--	LFMM/PCAdapt
Unigene0002284	4195	PREDICTED: zinc finger protein 454 isoform X1 [Hipposideros armiger]	LFMM/PCAdapt
Unigene0047630	1504	--	LFMM/PCAdapt
Unigene0042687	1591	PREDICTED: 6-phosphofructo-2-kinase/fructose-2,6-bisphosphatase 4 isoform X1 [Rhinolophus sinicus]	LFMM/PCAdapt
Unigene0033320	1554	PREDICTED: B-cell scaffold protein with ankyrin repeats [Rhinolophus sinicus]	LFMM/PCAdapt
Unigene0047409	752	PREDICTED: T-cell-interacting, activating receptor on myeloid cells protein 1-like isoform X1 [Rhinolophus sinicus]	LFMM/PCAdapt
Unigene0048063	102	PREDICTED: proline-rich transmembrane protein 1 [Rhinolophus sinicus]	LFMM/PCAdapt
Unigene0038739	2359	PREDICTED: EF-hand domain-containing protein 1 [Rhinolophus sinicus]	LFMM/PCAdapt
Unigene0030092	1323	PREDICTED: guanine nucleotide-binding protein-like 3 [Rhinolophus sinicus]	LFMM/PCAdapt
Unigene0042492	843	hCG39261, isoform CRA_b [Homo sapiens]	LFMM/PCAdapt
Unigene0031840	1800	PREDICTED: PDZ domain-containing protein 4 isoform X3 [Rhinolophus sinicus]	LFMM/PCAdapt
Unigene0035276	1245	PREDICTED: transmembrane channel-like protein 2 [Rhinolophus sinicus]	LFMM/PCAdapt
Unigene0030638	128	transmembrane emp24 domain-containing protein 2 isoform X2 [Microcebus murinus]	LFMM/PCAdapt
Unigene0023907	643	PREDICTED: LOW QUALITY PROTEIN: nuclear receptor subfamily 4 group A member 3 [Rhinolophus sinicus]	LFMM/PCAdapt
Unigene0033704	1564	PREDICTED: semaphorin-4C isoform X1 [Rhinolophus sinicus]	LFMM/PCAdapt
Unigene0032013	1433	PREDICTED: diacylglycerol kinase beta isoform X1 [Rhinolophus sinicus]	LFMM/PCAdapt
Unigene0039138	571	PREDICTED: netrin-G2 isoform X3 [Hipposideros armiger]	LFMM/PCAdapt
Unigene0043434	1679	PREDICTED: sulfhydryl oxidase 2, partial [Rhinolophus sinicus]	LFMM/PCAdapt
Unigene0042043	2947	PREDICTED: tRNA (adenine(58)-N(1))-methyltransferase catalytic subunit TRMT61A isoform X1 [Rhinolophus sinicus]	LFMM/PCAdapt
Unigene0028536	1880	PREDICTED: 60S ribosomal protein L22 isoform X2 [Chlorocebus sabaeus]	LFMM/PCAdapt
Unigene0031396	1076	mKIAA4036 protein, partial [Mus musculus]	LFMM/PCAdapt
Unigene0036616	481	PREDICTED: tankyrase-2 isoform X1 [Hipposideros armiger]	LFMM/PCAdapt
Unigene0042359	351	PREDICTED: protein TALPID3 isoform X1 [Hipposideros armiger]	LFMM/PCAdapt
Unigene0050750	5007	PREDICTED: retinol dehydrogenase 16 [Hipposideros armiger]	LFMM/PCAdapt
Unigene0008209	155	PREDICTED: immunoglobulin omega chain-like [Rhinolophus sinicus]	LFMM/PCAdapt
Unigene0042600	1659	--	LFMM/PCAdapt
Unigene0040895	246	PREDICTED: bcl-2 homologous antagonist/killer [Rhinolophus sinicus]	LFMM/PCAdapt
Unigene0006144	971	PREDICTED: serine/threonine-protein kinase Nek5 isoform X3 [Rhinolophus sinicus]	LFMM/PCAdapt
Unigene0043718	840	PREDICTED: LOW QUALITY PROTEIN: histone-lysine N-methyltransferase SETD1A [Rhinolophus sinicus]	LFMM/PCAdapt
Unigene0037682	86	PREDICTED: magnesium transporter NIPA1 [Hipposideros armiger]	LFMM/PCAdapt
Unigene0050625	5522	PREDICTED: tyrosine-protein phosphatase non-receptor type 13 isoform X3 [Rhinolophus sinicus]	LFMM/PCAdapt
Unigene0030268	133	PREDICTED: mediator of RNA polymerase II transcription subunit 12 isoform X8 [Rhinolophus sinicus]	LFMM/PCAdapt
Unigene0002341	1305	protein RUBCNL-like [Bos taurus]	LFMM/PCAdapt
Unigene0040519	427	PREDICTED: receptor-binding cancer antigen expressed on SiSo cells isoform X1 [Macaca fascicularis]	LFMM/PCAdapt
Unigene0004241	1247	PREDICTED: telomere length regulation protein TEL2 homolog [Rhinolophus sinicus]	LFMM/PCAdapt
Unigene0039511	3006	PREDICTED: double C2-like domain-containing protein beta [Pteropus vampyrus]	LFMM/PCAdapt
Unigene0027808	1137	PREDICTED: coiled-coil domain-containing protein 34 [Rhinolophus sinicus]	LFMM/PCAdapt
Unigene0038583	467	PREDICTED: myosin light polypeptide 6 isoform X1 [Pantholops hodgsonii]	LFMM/PCAdapt
Unigene0041353	834	PREDICTED: prostaglandin G/H synthase 1 [Rhinolophus sinicus]	LFMM/PCAdapt
Unigene0038396	2247	PREDICTED: ubiquitin-like modifier-activating enzyme 7 isoform X2 [Rhinolophus sinicus]	LFMM/PCAdapt
Unigene0048229	3556	Pre-mRNA-processing-splicing factor 8 [Myotis brandtii]	LFMM/PCAdapt
Unigene0043928	1374	PREDICTED: tumor necrosis factor receptor superfamily member 1B isoform X1 [Rhinolophus sinicus]	LFMM/PCAdapt
Unigene0041196	492	PREDICTED: protein PRRC2A isoform X1 [Rhinolophus sinicus]	LFMM/PCAdapt
Unigene0047350	185	PREDICTED: short/branched chain specific acyl-CoA dehydrogenase, mitochondrial [Rhinolophus sinicus]	LFMM/PCAdapt
Unigene0041402	539	glutamate receptor ionotropic, delta-1 isoform X1 [Microcebus murinus]	LFMM/PCAdapt
Unigene0046859	1510	PREDICTED: kinesin-like protein KIF16B isoform X4 [Rhinolophus sinicus]	LFMM/PCAdapt
Unigene0027263	1221	PREDICTED: mitogen-activated protein kinase 15 isoform X2 [Rhinolophus sinicus]	LFMM/PCAdapt
Unigene0038316	3326	PREDICTED: peptidyl-prolyl cis-trans isomerase-like 4 [Rhinolophus sinicus]	LFMM/PCAdapt
Unigene0039739	761	C12orf45 protein [Homo sapiens]	LFMM/PCAdapt
Unigene0040319	2503	PREDICTED: polymeric immunoglobulin receptor [Rhinolophus sinicus]	LFMM/PCAdapt
Unigene0037153	512	PREDICTED: yrdC domain-containing protein, mitochondrial isoform X1 [Hipposideros armiger]	LFMM/PCAdapt
Unigene0040378	1706	PREDICTED: leucine-rich repeat-containing protein 32 isoform X1 [Rhinolophus sinicus]	LFMM/PCAdapt
Unigene0039795	327	--	LFMM/PCAdapt
Unigene0003971	208	--	LFMM/PCAdapt
Unigene0050001	1053	PREDICTED: peroxisome proliferator-activated receptor alpha [Rhinolophus sinicus]	LFMM/PCAdapt
Unigene0034957	732	PREDICTED: transmembrane protein 182 [Rhinolophus sinicus]	LFMM/PCAdapt
Unigene0043244	1501	PREDICTED: arginyl-tRNA--protein transferase 1 isoform X6 [Hipposideros armiger]	LFMM/PCAdapt
Unigene0004591	192	PREDICTED: villin-like protein isoform X3 [Rhinolophus sinicus]	LFMM/PCAdapt
Unigene0026369	457	PREDICTED: GAS2-like protein 2 [Rhinolophus sinicus]	LFMM/PCAdapt
Unigene0041073	355	PREDICTED: protein AF1q [Rhinolophus sinicus]	LFMM/PCAdapt
Unigene0013749	548	PREDICTED: kallikrein-9 isoform X2 [Rhinolophus sinicus]	LFMM/PCAdapt
Unigene0045985	788	PREDICTED: nuclear receptor-interacting protein 2 [Hipposideros armiger]	LFMM/PCAdapt
Unigene0039663	1656	PREDICTED: GPI mannosyltransferase 2 [Rhinolophus sinicus]	LFMM/PCAdapt
Unigene0052025	4167	PREDICTED: protein KIAA0556 homolog isoform X1 [Rhinolophus sinicus]	LFMM/PCAdapt
Unigene0047345	618	PREDICTED: rho guanine nucleotide exchange factor 40 isoform X7 [Rhinolophus sinicus]	LFMM/PCAdapt
Unigene0032877	660	C14orf93 protein [Homo sapiens]	LFMM/PCAdapt
Unigene0041599	1276	PREDICTED: sulfhydryl oxidase 1 [Rhinolophus sinicus]	LFMM/PCAdapt
Unigene0026000	234	--	LFMM/PCAdapt
Unigene0032484	187	PREDICTED: histamine H3 receptor isoform X2 [Miniopterus natalensis]	LFMM/PCAdapt
Unigene0004653	94	PREDICTED: protein FAM168A isoform X2 [Nannospalax galili]	LFMM/PCAdapt
Unigene0004747	578	PREDICTED: receptor tyrosine-protein kinase erbB-4 [Ornithorhynchus anatinus]	LFMM/PCAdapt
Unigene0051055	6029	PREDICTED: high affinity cationic amino acid transporter 1 [Rhinolophus sinicus]	LFMM/PCAdapt
Unigene0036404	1957	PREDICTED: potassium voltage-gated channel subfamily H member 3 isoform X1 [Rhinolophus sinicus]	LFMM/PCAdapt
Unigene0031549	1479	PREDICTED: IQ and AAA domain-containing protein 1 [Rhinolophus sinicus]	LFMM/PCAdapt
Unigene0051589	4646	PREDICTED: probable E3 ubiquitin-protein ligase HECTD4 isoform X3 [Ovis aries musimon]	LFMM/PCAdapt
Unigene0050099	481	PREDICTED: dual serine/threonine and tyrosine protein kinase [Rhinolophus sinicus]	LFMM/PCAdapt
Unigene0007191	129	--	LFMM/PCAdapt
Unigene0052368	151	--	LFMM/PCAdapt
Unigene0032286	445	PREDICTED: RNA-binding protein 40 isoform X1 [Rhinolophus sinicus]	LFMM/PCAdapt
Unigene0036028	1205	TatD DNase domain containing 2 [Homo sapiens]	LFMM/PCAdapt
Unigene0014668	622	Fructose-bisphosphate aldolase C, partial [Bos mutus]	LFMM/PCAdapt
Unigene0033824	599	PREDICTED: TRIO and F-actin-binding protein isoform X2 [Rhinolophus sinicus]	LFMM/PCAdapt
Unigene0049746	1607	casein kinase 1, gamma 1, partial [Mus musculus]	LFMM/PCAdapt
Unigene0028031	1065	PREDICTED: OTU domain-containing protein 1 [Rhinolophus sinicus]	LFMM/PCAdapt
Unigene0045530	2056	PREDICTED: integrin alpha-11 [Rhinolophus sinicus]	LFMM/PCAdapt
Unigene0040213	1600	PREDICTED: sodium channel subunit beta-4 isoform X1 [Hipposideros armiger]	LFMM/PCAdapt
Unigene0034123	1871	PREDICTED: WD repeat-containing protein 19 isoform X2 [Rhinolophus sinicus]	LFMM/PCAdapt
Unigene0039874	1483	PREDICTED: ensconsin isoform X2 [Rhinolophus sinicus]	LFMM/PCAdapt
Unigene0002454	413	PREDICTED: tumor necrosis factor receptor superfamily member 5 [Rhinolophus sinicus]	LFMM/PCAdapt
Unigene0002217	4733	PREDICTED: pyridoxal-dependent decarboxylase domain-containing protein 1 [Rhinolophus sinicus]	LFMM/PCAdapt
Unigene0049603	301	--	LFMM/PCAdapt
Unigene0043041	2823	PREDICTED: protein Wnt-7b [Mesocricetus auratus]	LFMM/PCAdapt
Unigene0030527	1266	PREDICTED: taperin, partial [Rhinolophus sinicus]	LFMM/PCAdapt
Unigene0052597	5614	PREDICTED: very large A-kinase anchor protein [Rhinolophus sinicus]	LFMM/PCAdapt
Unigene0036429	1264	PREDICTED: potassium channel subfamily K member 12 [Rhinolophus sinicus]	LFMM/PCAdapt
Unigene0020517	394	--	LFMM/PCAdapt
Unigene0034519	1109	PREDICTED: F-box only protein 2 [Rhinolophus sinicus]	LFMM/PCAdapt
Unigene0026673	126	PREDICTED: KN motif and ankyrin repeat domain-containing protein 3 [Rhinolophus sinicus]	LFMM/PCAdapt
Unigene0050373	4392	PREDICTED: transformation/transcription domain-associated protein isoform X4 [Canis lupus familiaris]	LFMM/PCAdapt
Unigene0003750	691	PREDICTED: zinc finger protein 343 isoform X2 [Rhinolophus sinicus]	LFMM/PCAdapt
Unigene0046287	125	--	LFMM/PCAdapt
Unigene0013605	125	PREDICTED: chondroitin sulfate proteoglycan 4-like isoform X1 [Rhinolophus sinicus]	LFMM/PCAdapt
Unigene0043459	208	PREDICTED: cysteine-rich DPF motif domain-containing protein 1 isoform X2 [Rhinolophus sinicus]	LFMM/PCAdapt
Unigene0049416	1907	PREDICTED: aldehyde oxidase 2 [Rhinolophus sinicus]	LFMM/PCAdapt
Unigene0040147	1200	PREDICTED: dnaJ homolog subfamily C member 28 [Rhinolophus sinicus]	LFMM/PCAdapt
Unigene0002471	3417	PREDICTED: DNA-directed RNA polymerase III subunit RPC1 [Rhinolophus sinicus]	LFMM/PCAdapt
Unigene0031577	825	--	LFMM/PCAdapt
Unigene0016811	70	PREDICTED: muscarinic acetylcholine receptor M2 [Rhinolophus sinicus]	LFMM/PCAdapt
Unigene0047294	2366	PREDICTED: LOW QUALITY PROTEIN: FLYWCH-type zinc finger-containing protein 1 [Rhinolophus sinicus]	LFMM/PCAdapt
Unigene0037116	406	--	LFMM/PCAdapt
Unigene0005440	2080	myotrophin [Homo sapiens]	LFMM/PCAdapt
Unigene0002805	1416	PREDICTED: Bardet-Biedl syndrome 12 protein [Rhinolophus sinicus]	LFMM/PCAdapt
Unigene0031464	2426	PREDICTED: metabotropic glutamate receptor 4 isoform X5 [Rhinolophus sinicus]	LFMM/PCAdapt
Unigene0044685	1692	PREDICTED: MAP7 domain-containing protein 3 isoform X4 [Rhinolophus sinicus]	LFMM/PCAdapt
Unigene0035749	1069	PREDICTED: cactin [Rhinolophus sinicus]	LFMM/PCAdapt
Unigene0034079	514	PREDICTED: NAD(P)H-hydrate epimerase [Condylura cristata]	LFMM/PCAdapt
Unigene0051868	307	PREDICTED: cytoplasmic dynein 1 heavy chain 1 [Rhinolophus sinicus]	LFMM/PCAdapt
Unigene0002571	239	PREDICTED: nucleobindin-1 isoform X4 [Rhinolophus sinicus]	LFMM/PCAdapt
Unigene0016573	293	--	LFMM/PCAdapt
Unigene0021480	291	--	LFMM/PCAdapt
Unigene0046118	180	--	LFMM/PCAdapt
Unigene0005267	1415	PREDICTED: tumor protein p73 isoform X1 [Hipposideros armiger]	LFMM/PCAdapt
Unigene0027270	2301	PREDICTED: heparan-sulfate 6-O-sulfotransferase 2 isoform X4 [Hipposideros armiger]	LFMM/PCAdapt
Unigene0050335	390	PREDICTED: 60S ribosomal protein L23a [Capra hircus]	LFMM/PCAdapt
Unigene0036915	2899	PREDICTED: ankyrin repeat domain-containing protein SOWAHA [Rhinolophus sinicus]	LFMM/PCAdapt
Unigene0051035	55	hCG1773980 [Homo sapiens]	LFMM/PCAdapt
Unigene0030152	1966	PREDICTED: outer dense fiber protein 2-like isoform X2 [Rhinolophus sinicus]	LFMM/PCAdapt
Unigene0029701	2979	PREDICTED: proline-rich basic protein 1 [Rhinolophus sinicus]	LFMM/PCAdapt
Unigene0052435	7035	PREDICTED: CLIP-associating protein 1 isoform X2 [Rhinolophus sinicus]	LFMM/PCAdapt
Unigene0049493	194	--	LFMM/PCAdapt
Unigene0000327	69	PREDICTED: sorting nexin-27 isoform X1 [Hipposideros armiger]	LFMM/PCAdapt
Unigene0034509	1540	PREDICTED: dihydropyrimidinase-related protein 2 isoform X4 [Rhinolophus sinicus]	LFMM/PCAdapt
Unigene0031049	175	PREDICTED: MARVEL domain-containing protein 3 isoform X2 [Rhinolophus sinicus]	LFMM/PCAdapt
Unigene0026686	453	PREDICTED: histone chaperone ASF1B [Rhinolophus sinicus]	LFMM/PCAdapt
Unigene0040167	3421	PREDICTED: rho GTPase-activating protein SYDE2 isoform X1 [Rhinolophus sinicus]	LFMM/PCAdapt
Unigene0048462	4536	PREDICTED: Golgi membrane protein 1 isoform X2 [Rhinolophus sinicus]	LFMM/PCAdapt
Unigene0051178	1357	PREDICTED: interleukin-6 receptor subunit alpha isoform X1 [Rhinolophus sinicus]	LFMM/PCAdapt
Unigene0001742	648	PREDICTED: testis-expressed sequence 33 protein isoform X1 [Rhinolophus sinicus]	LFMM/PCAdapt
Unigene0042378	1057	PREDICTED: zinc finger protein 154-like [Rhinolophus sinicus]	LFMM/PCAdapt
Unigene0041713	3691	PREDICTED: pumilio homolog 2 isoform X1 [Rhinolophus sinicus]	LFMM/PCAdapt
Unigene0035006	413	PREDICTED: protein C9orf72 homolog isoform X1 [Rhinolophus sinicus]	LFMM/PCAdapt
Unigene0039716	259	PREDICTED: G-protein coupled estrogen receptor 1 isoform X2 [Hipposideros armiger]	LFMM/PCAdapt
Unigene0034796	871	PREDICTED: MARVEL domain-containing protein 2 isoform X1 [Rhinolophus sinicus]	LFMM/PCAdapt
Unigene0033570	1012	PREDICTED: actin-binding protein IPP [Rhinolophus sinicus]	LFMM/PCAdapt
Unigene0039017	1168	PREDICTED: phosphatidylinositol 4,5-bisphosphate 3-kinase catalytic subunit alpha isoform [Rhinolophus sinicus]	LFMM/PCAdapt
Unigene0041106	807	PREDICTED: BRCA1-associated RING domain protein 1 isoform X1 [Rhinolophus sinicus]	LFMM/PCAdapt
Unigene0046237	404	PREDICTED: interleukin enhancer-binding factor 2 [Miniopterus natalensis]	LFMM/PCAdapt
Unigene0030116	642	PREDICTED: Kv channel-interacting protein 1 isoform X1 [Orycteropus afer afer]	LFMM/PCAdapt
Unigene0005354	1616	PREDICTED: transmembrane protein 79 [Rhinolophus sinicus]	LFMM/PCAdapt
Unigene0026947	304	PREDICTED: glucagon-like peptide 1 receptor, partial [Hipposideros armiger]	LFMM/PCAdapt
Unigene0039480	1270	PREDICTED: patatin-like phospholipase domain-containing protein 1 isoform X1 [Rhinolophus sinicus]	LFMM/PCAdapt
Unigene0032825	1505	PREDICTED: diacylglycerol O-acyltransferase 2 isoform X1 [Rhinolophus sinicus]	LFMM/PCAdapt
Unigene0047183	3529	PREDICTED: protein FAM124A [Rhinolophus sinicus]	LFMM/PCAdapt
Unigene0033450	1264	PREDICTED: centrosomal protein C10orf90 homolog isoform X2 [Rhinolophus sinicus]	LFMM/PCAdapt
Unigene0041569	809	PREDICTED: cyclin-dependent kinase 4 inhibitor B [Rhinolophus sinicus]	LFMM/PCAdapt
Unigene0044457	3170	PREDICTED: general transcription factor 3C polypeptide 6 isoform X2 [Rhinolophus sinicus]	LFMM/PCAdapt
Unigene0045981	3996	PREDICTED: regulator of G-protein signaling 10 isoform X1 [Rhinolophus sinicus]	LFMM/PCAdapt

## Sheet: Table S10
Table S10 Detail of genes under positive selection.
UnigeneID	lnL of alternative hypothesis	lnL of null hypothesis	P-value	FDR	Gene Symbol
JL_Unigene0017469	-2122.57	-2044.93	0	0	GRINA
JL_Unigene0034858	-656.059	-630.489	7.85438e-12	1.61211e-08	MRPL17
JL_Unigene0000729	-380.311	-363.493	4.96567e-08	6.7947e-05	CDO1
JL_Unigene0000680	-2127.2	-2110.99	9.15848e-08	8.41364e-05	TFIP11
JL_Unigene0028730	-1535.58	-1519.54	1.07522e-07	8.41364e-05	CASP7
JL_Unigene0033652	-1069.5	-1053.72	1.40101e-07	8.41364e-05	H2-Q10
JL_Unigene0015344	-676.724	-660.967	1.43473e-07	8.41364e-05	CFAP20
JL_Unigene0020604	-825.756	-810.252	1.84834e-07	9.48428e-05	EFNA1
JL_Unigene0031266	-1256.65	-1241.32	2.19834e-07	0.000100269	PGAP3
JL_Unigene0011424	-778.824	-763.734	2.79572e-07	0.000114764	IL1B
JL_Unigene0022940	-364.438	-349.528	3.34546e-07	0.000124847	HPF1
JL_Unigene0031349	-1051.97	-1037.99	8.45036e-07	0.000289073	TIMMDC1
JL_Unigene0021141	-627.053	-613.199	9.61487e-07	0.000291762	LYZ
JL_Unigene0008167	-1315.92	-1302.1	9.95048e-07	0.000291762	PRSS22
JL_Unigene0017986	-1941.73	-1928.26	1.41841e-06	0.000383445	DDX1
JL_Unigene0024065	-1282.6	-1269.18	1.49455e-06	0.000383445	CFAP36
JL_Unigene0000751	-797.144	-783.914	1.79581e-06	0.000433635	RPC40
JL_Unigene0004834	-923.233	-910.357	2.55968e-06	0.000583748	FBXL15
JL_Unigene0029268	-849.666	-837.781	6.89636e-06	0.00148998	MRI
JL_Unigene0031692	-634.846	-623.458	1.1333e-05	0.00232611	LIAS
JL_Unigene0023836	-2469.23	-2458.38	1.94005e-05	0.00379233	ZW10
JL_Unigene0019981	-1303.89	-1293.12	2.08284e-05	0.0038864	VEZF1
JL_Unigene0024612	-512.877	-502.309	2.57243e-05	0.00459123	FDFT1
JL_Unigene0011394	-1039.84	-1030.43	8.23252e-05	0.014081	GPN1
JL_Unigene0015124	-2588.75	-2579.72	0.000119685	0.0196523	CCDC65
JL_Unigene0003152	-522.604	-513.712	0.000137466	0.0211525	NFKBIA
JL_Unigene0026667	-1292.81	-1283.93	0.000139128	0.0211525	TMX4
JL_Unigene0022617	-1111.02	-1102.44	0.000188177	0.0275881	NIPSNAP1
JL_Unigene0023264	-1991.12	-1982.77	0.000236103	0.0334207	NDUFS2
JL_Unigene0001933	-1453.79	-1445.59	0.000275254	0.0376639	ADHFE1
JL_Unigene0033799	-817.18	-809.175	0.000333962	0.0442231	DESI1
HN_Unigene0031715	-1542.16	-1557.12	3.164e-07	0.00129882	ZFP64
HN_Unigene0029350	-1233.23	-1244.51	1.26231e-05	0.0227065	CCDC13
HN_Unigene0031490	-1806.2	-1817.21	1.65943e-05	0.0227065	TMEM214
HN_Unigene0030548	-951.513	-961.785	3.45895e-05	0.0354975	MED6
HN_Unigene0012820	-1075.6	-1085.63	4.40589e-05	0.0361723	RWDD1
HN_Unigene0019234	-3879.97	-3870.37	6.71428e-05	0.0459369	PRDM15
YN_Unigene0029570	-3041.47	-3073.33	1.45439e-14	5.97028e-11	FLYWCH1
YN_Unigene0050776	-1837.19	-1855.72	8.93633e-09	1.83418e-05	CLEC4G
YN_Unigene0024038	-1541.27	-1556.18	3.36734e-07	0.000460765	COG8
YN_Unigene0034023	-1377.41	-1389.92	3.67319e-06	0.00376962	PI31,PSMF1
YN_Unigene0022822	-1477.3	-1489.4	5.53397e-06	0.00420097	MS4A8
YN_Unigene0000732	-3055.18	-3067.18	6.14027e-06	0.00420097	PIK3R6
YN_Unigene0033928	-1161.84	-1172.53	2.28062e-05	0.0129662	UBXN1
YN_Unigene0013768	-1938.67	-1949.25	2.52692e-05	0.0129662	CDC25B
YN_Unigene0022706	-854.96	-865.095	3.96483e-05	0.018084	CBX3
YN_Unigene0024661	-1130.12	-1140.11	4.57217e-05	0.0187688	C18orf21
YN_Unigene0018960	-185.176	-195.059	5.10289e-05	0.0190431	EIF4E3
YN_Unigene0002672	-3312.68	-3322.27	6.83309e-05	0.0233748	RECQL
